# Supplementary material
Source: publisher site journal article supplement (https://www.spandidos-publications.com/2007/downloadSupplementary)
Supplement: Supplementary file 1 [file downloadSupplementary]

## Sheet: I-H
Table SII: Differentially expressed peptides between the IgAN group and the healthy control group
Peptide	m/z	Quality	Significance	Avg. ppm	Theoretical pI	Accession	PTM	IgAN-average	Healthy-average	IgAN/Con	P	IgAN 1	IgAN 124	IgAN 13	IgAN 139	IgAN 15	IgAN 16	IgAN 171	IgAN 193	IgAN 194	IgAN 28	IgAN 32	IgAN 33	IgAN 358	IgAN 360	IgAN 4	IgAN 43	IgAN 85	con 116	con 123	con 124	con 128	con 132	con 133	con 134	con 142	con 46	con 81	con 82
GLDQPCPVGP	491.731	0.03	60	4.1	3.8			0	867.455	0	0.0494911	0	0	0	0	0	0	0	0	0	0	0	0	0	0	0	0	0	0	4410	772	0	0	0	0	0	0	0	4360
Q(-17.03)KKGVKNLVS	542.329	0.02	60	5.6	10.3		Pyro-glu from Q	0	5036.36	0	0.0492768	0	0	0	0	0	0	0	0	0	0	0	0	0	0	0	0	0	11300	11700	0	0	32400	0	0	0	0	0	0
PPKPPLPEGEVPPPRPPPPEEKDEEFPEQKAGEVIN	794.206	0.13	60	6.3	4.34	sp|P18206|VINC_HUMAN		9237.06	0	#DIV/0!	0.0492292	0	0	37100	0	17200	50100	0	13100	19900	3680	3450	12500	0	0	0	0	0	0	0	0	0	0	0	0	0	0	0	0
KPGDTGPQGFPGTPGDVGPKGDKGDPGVGERGPPGPQ(+.98)GPPGPPGPS	851.608	0.05	2.42	6.5	4.78		Deamidation (NQ)	1095.88	3804.55	0.288046	0.048991	0	0	0	0	16300	0	0	0	0	0	0	0	2330	0	0	0	0	2260	2680	0	4490	3980	2330	7780	3000	6990	4550	3790
ICQNTPGSFTCECQRGFSLDQTGSSCE	725.298	0.04	60	4.8	4.14			780.588	0	#DIV/0!	0.0489706	0	1880	0	0	0	0	0	0	1060	2250	1320	2730	0	0	0	0	4030	0	0	0	0	0	0	0	0	0	0	0
NGFKSHALQLN	614.827	0.01	60	11.5	8.76			0	447.909	0	0.0489556	0	0	0	0	0	0	0	0	0	0	0	0	0	0	0	0	0	0	0	0	0	0	0	1430	0	2800	0	697
N(+.98)PGGDFGKKELSP	673.831	0.07	60	3.8	6.07		Deamidation (NQ)	3560	0	#DIV/0!	0.0488813	19400	5220	0	6030	0	0	14200	0	0	7270	3470	0	0	0	4930	0	0	0	0	0	0	0	0	0	0	0	0	0
GAGPDPRGGG	420.695	0.03	60	9.8	5.84			0	1635.18	0	0.0487259	0	0	0	0	0	0	0	0	0	0	0	0	0	0	0	0	0	0	0	2130	1660	1280	11300	650	0	0	0	967
SCWN(+.98)CGRKASETC	723.277	0.21	60	6.9	7.7		Deamidation (NQ)	2309.12	0	#DIV/0!	0.0486612	12700	885	0	7400	0	0	6120	0	0	0	0	4190	0	0	5300	2660	0	0	0	0	0	0	0	0	0	0	0	0
VAAVVRGAALM	1057.63	0.12	1.7	7.4	9.72			667.176	1605.55	0.415545	0.0486586	330	313	0	524	1420	2500	900	0	334	662	1530	1260	376	0	150	786	257	939	2170	0	2980	0	5340	2390	2620	132	1090	0
EHAKLEEQ(+.98)LQHAKFEITECFISD	916.112	0.11	60	8.4	4.68		Deamidation (NQ)	1588.82	0	#DIV/0!	0.0486113	0	0	0	0	0	4530	0	0	2030	0	0	7590	2000	0	0	5230	5630	0	0	0	0	0	0	0	0	0	0	0
TQPRGPPASSPAPAPKFSPVTPKFTPVAS	730.142	0.19	60	6.8	11.17	sp|Q15942|ZYX_HUMAN		3858.82	0	#DIV/0!	0.04848	0	0	10400	0	17000	0	0	7860	6010	0	1910	18500	3920	0	0	0	0	0	0	0	0	0	0	0	0	0	0	0
SCPTG	464.188	0.11	60	2.8	5.24			0	533.636	0	0.04839	0	0	0	0	0	0	0	0	0	0	0	0	0	0	0	0	0	387	0	0	3490	0	583	0	0	0	0	1410
HNERKEKLKQQLKGKEV	1046.63	0.03	4.83	12	9.82			759.459	71.7273	10.5881	0.0483559	322	295	29.1	1340	1450	2620	1770	19.7	825	0	3690	0	550	0	0	0	0	409	380	0	0	0	0	0	0	0	0	0
NLAKGKEESLDSDLYA	584.962	0.05	60	11.1	4.32			3471.53	0	#DIV/0!	0.0480299	0	0	9880	0	16000	13000	0	0	586	0	0	2890	0	3470	0	1090	12100	0	0	0	0	0	0	0	0	0	0	0
SGAESSKGAAFVSKQEGSEVVKRPR	519.079	0.08	60	6.1	9.69			118.706	1680.91	0.07062	0.0478852	0	0	0	0	0	0	0	0	0	498	0	0	0	0	1520	0	0	0	0	0	0	0	0	7140	8090	0	0	3260
E(-18.01)YIIQLSKGRLVLKT	581.69	0.15	3.14	2.9	9.7		Pyro-glu from E	5790.59	26036.4	0.222404	0.047863	0	4840	0	0	0	0	0	33500	0	10000	36100	0	0	0	14000	0	0	79800	0	0	47000	0	64400	0	0	0	95200	0
LDIQGTGQLLFSVVINQLR	705.397	0.03	60	8	5.84			0	60.2636	0	0.0477882	0	0	0	0	0	0	0	0	0	0	0	0	0	0	0	0	0	13.9	161	0	0	0	0	0	0	0	101	387
DDEEEEN(+.98)SAFESVPDSMQ(+.98)SPELDPES	583.624	0.05	60	7	3.12		Deamidation (NQ)	398	0	#DIV/0!	0.0477177	0	384	1880	409	0	0	0	0	1030	0	260	212	0	1880	0	0	711	0	0	0	0	0	0	0	0	0	0	0
HRHPDEAAFFDTASTGKTFPG	573.02	0.01	5.35	9	6	sp|P02671|FIBA_HUMAN		3621.18	57.4545	63.0268	0.0476043	0	1120	6710	0	21300	0	0	10800	4630	1720	0	0	2650	0	0	4750	7880	0	632	0	0	0	0	0	0	0	0	0
IRPHITT	837.498	0.01	60	12	9.76			63.0588	243.236	0.259249	0.047473	0	889	0	0	0	0	183	0	0	0	0	0	0	0	0	0	0	19.2	173	0	710	556	323	300	89.4	361	144	0
RGGGAGGCGGPGGGGRLGGDSPGSQ(+.98)A	525.736	0.04	60	6.7	8.25		Deamidation (NQ)	0	471.818	0	0.047361	0	0	0	0	0	0	0	0	0	0	0	0	0	0	0	0	0	1960	0	0	0	0	0	2690	0	540	0	0
DDDEEMKN(+.98)QCFGGEYM(+15.99)GEVFDHMM	719.268	0.05	60	5.2	3.84		Deamidation (NQ); Oxidation (M)	1954.12	0	#DIV/0!	0.0472091	10400	3270	0	6410	0	0	4010	0	0	0	0	0	4630	0	0	0	4500	0	0	0	0	0	0	0	0	0	0	0
GGSTSYGTGSETESPRNPSSAGSWNSGSSGPG	1001.43	0.01	60	12.9	4.53	sp|P02671|FIBA_HUMAN		41.1765	429.091	0.0959621	0.0472061	700	0	0	0	0	0	0	0	0	0	0	0	0	0	0	0	0	1350	0	0	0	0	0	0	1890	1480	0	0
LGQKVCRPVVLKPIPTKPAV	1072.16	0.19	2.43	6.2	10.32			1801.12	4536.36	0.39704	0.0470555	401	0	1130	2700	858	2180	6800	0	0	6120	2710	0	1580	0	1400	3470	1270	0	3220	0	0	11700	1320	10600	9820	4210	9030	0
KGGGP	415.231	0.11	6.25	6.7	8.75			4813.89	519.745	9.26201	0.047041	0	4830	2690	3790	65.9	40.6	0	26900	9970	3830	163	56.6	8540	6470	0	10300	4190	0	182	0	17.2	0	645	1570	223	0	3080	0
LSRQ(+.98)N(+.98)LQSPKSSRSTIFV	513.281	0.01	60	1.3	12.01		Deamidation (NQ)	0	1052.73	0	0.0470298	0	0	0	0	0	0	0	0	0	0	0	0	0	0	0	0	0	2030	0	0	6610	0	0	0	0	2940	0	0
VKVFSLAVNLIAID	751.452	0.04	5.43	8.8	5.81	sp|P01024|CO3_HUMAN		225.118	4163.27	0.0540723	0.0470094	0	0	1630	0	0	1460	0	0	0	737	0	0	0	0	0	0	0	2450	0	662	24700	1400	2070	13500	0	0	466	548
SSLASQNEGM(+15.99)DDTSSA	808.316	0.04	60	4	3.49		Oxidation (M)	22004.1	0	#DIV/0!	0.0469739	104000	16100	0	46500	0	0	15300	0	0	63700	6070	0	0	13700	10200	98500	0	0	0	0	0	0	0	0	0	0	0	0
ALAASFPTLLVLRLLHGGTLAGALLALYLARLE	855.27	0.01	5.22	8.7	8.8	sp|A6NKX4|S22AV_HUMAN		199.059	1163	0.17116	0.0469338	0	2050	0	0	0	0	0	0	0	0	0	350	0	984	0	0	0	2290	5550	0	3090	0	0	869	994	0	0	0
EAMLQ(+.98)ANHYDMDM	523.87	0.06	60	6.5	4.02		Deamidation (NQ)	5362.94	0	#DIV/0!	0.0469069	0	0	0	0	0	0	15900	3210	7800	0	9060	14200	30200	10800	0	0	0	0	0	0	0	0	0	0	0	0	0	0
KLASGPLAAPAQPRPLRSLSPSVRQ(+.98)LSR	985.599	0.03	60	4.9	12.48		Deamidation (NQ)	1965.29	0	#DIV/0!	0.0468522	0	0	10900	0	0	1490	0	1520	3900	0	2020	1880	0	7440	0	4260	0	0	0	0	0	0	0	0	0	0	0	0
IINCIGGLN(+.98)VL	565.326	0.01	60	12.6	5.52		Deamidation (NQ)	0	895.545	0	0.0468248	0	0	0	0	0	0	0	0	0	0	0	0	0	0	0	0	0	0	911	4480	0	0	4460	0	0	0	0	0
GAVLALLFLLLVLLLLVRKKRK	623.192	0.31	6.06	3.4	12.02			14680	4273.64	3.43501	0.0467065	21400	0	36500	0	18600	2380	0	33600	21000	17200	0	45000	0	28600	0	17900	7380	9790	0	0	0	0	0	920	28500	6290	1510	0
VFTLLRLLVVA	622.41	0.02	60	7	9.72			245.647	0	#DIV/0!	0.0465962	0	999	0	108	0	0	0	846	561	0	783	0	0	0	879	0	0	0	0	0	0	0	0	0	0	0	0	0
HATPLPKK	891.547	0.06	3.29	6.2	10			85.5882	368.636	0.232175	0.0465871	161	246	0	0	0	0	0	337	0	0	0	0	0	0	100	230	381	1080	1690	0	0	264	259	422	0	204	136	0
RGLRRVM	887.547	0.06	3.56	6.1	12.3			125.353	946.055	0.132501	0.0465383	644	0	292	0	0	329	500	204	0	0	162	0	0	0	0	0	0	2160	5260	0	0	329	0	0	1540	1070	47.6	0
Q(-17.03)ARM(+15.99)RGFQARKRYLRRRAALGQ(+.98)LNTILLVAQPLLQRRQ	910.151	0.01	5.21	12.7	12.55		Pyro-glu from Q; Oxidation (M); Deamidation (NQ)	82.3529	1477.27	0.0557466	0.0463156	0	0	0	0	0	0	0	0	0	0	0	0	0	0	1400	0	0	1440	0	0	0	0	0	4960	8400	1450	0	0
SSSGGSSGGSSGGSSGN(+.98)S	702.273	0.27	60	4.5	5.24		Deamidation (NQ)	17854.1	0	#DIV/0!	0.0461929	0	20800	0	69000	0	0	56400	0	0	10500	7980	0	0	9040	93600	17500	18700	0	0	0	0	0	0	0	0	0	0	0
EGMEEGEFSEAREDMAA	944.367	0.09	60	3.5	3.77	sp|P68366|TBA4A_HUMAN		1184.12	0	#DIV/0!	0.0461075	0	0	3100	0	0	4020	0	0	1580	704	966	1170	0	1910	0	0	6680	0	0	0	0	0	0	0	0	0	0	0
SAKPTKPAASDLPVPAEGVRNI	555.308	0.14	60	4.3	8.31			7832.35	0	#DIV/0!	0.0460401	0	0	10300	0	30700	41100	0	0	1040	1280	0	4360	1820	15200	0	20800	6550	0	0	0	0	0	0	0	0	0	0	0
PGGGYGAA	649.289	0.01	60	7.5	5.95			498.941	69.7273	7.15561	0.0459821	0	0	0	0	1140	0	0	0	744	0	731	0	271	1250	936	2070	1340	0	0	767	0	0	0	0	0	0	0	0
SALHHALEESASLL	739.391	0.01	60	8.9	5.22			1720.12	7520.64	0.22872	0.0458227	0	0	0	0	0	0	0	4700	9830	0	0	832	6250	0	0	0	7630	7170	0	0	7460	0	32300	497	19900	15400	0	0
Q(-17.03)EKNPLPSKETIEQE	876.933	0.04	60	2.4	4.49	sp|P62328|TYB4_HUMAN	Pyro-glu from Q	5130	0	#DIV/0!	0.0456046	0	0	14100	0	19400	17700	0	0	0	0	0	0	0	5420	0	8290	22300	0	0	0	0	0	0	0	0	0	0	0
DSSPDSAED	461.663	0.05	60	3.5	3.37			0	1360	0	0.0455524	0	0	0	0	0	0	0	0	0	0	0	0	0	0	0	0	0	6720	0	0	1470	0	0	0	0	0	6770	0
N(+.98)GFKSHALQ(+.98)LNNRQIR	633.346	0.01	60	12.7	12.01		Deamidation (NQ)	28.0588	3835.45	0.00731564	0.0455489	0	0	0	0	477	0	0	0	0	0	0	0	0	0	0	0	0	15700	0	0	3690	21700	0	0	0	1100	0	0
CDRWMHAVCQNLNTEEEVENVADI	564.456	0.04	60	4.1	4.08			1331.88	0	#DIV/0!	0.0454539	0	0	3550	0	4840	4810	0	0	932	0	0	0	0	2900	0	0	5610	0	0	0	0	0	0	0	0	0	0	0
G(+42.01)EDAAQAEKFQHPGSDM(+15.99)	625.933	0.01	60	6.4	4.31		Acetylation (Protein N-term); Oxidation (M)	984.706	0	#DIV/0!	0.0454121	0	0	1850	3030	2600	3680	0	0	0	0	0	0	0	0	0	4540	1040	0	0	0	0	0	0	0	0	0	0	0
EEEGEEEEEEEGGGD	551.526	0.1	60	4.9	3.22			3979.41	0	#DIV/0!	0.0453913	14700	2970	0	0	0	0	0	0	0	0	13500	8480	0	0	10800	17200	0	0	0	0	0	0	0	0	0	0	0	0
PNSSIKNQTILKKGKREN(+.98)IVNIRKQ	969.93	0.02	60	8.7	11.22		Deamidation (NQ)	1925.18	0	#DIV/0!	0.0453624	10200	0	0	0	0	2290	0	7060	4910	0	0	4170	0	1100	0	428	2570	0	0	0	0	0	0	0	0	0	0	0
PRVPKYV	858.532	0.03	4.94	5.3	10.01			43.2353	562.818	0.0768193	0.0453428	0	0	0	0	0	50	0	204	0	0	0	227	0	0	0	254	0	3420	0	0	0	0	717	0	246	0	738	1070
REYHTEKLVTSKGDKEL	509.022	0.06	60	1.9	6.77	sp|P02671|FIBA_HUMAN		160.588	2755.82	0.0582724	0.045182	2730	0	0	0	0	0	0	0	0	0	0	0	0	0	0	0	0	5060	0	0	0	0	15100	0	9290	0	0	864
VLRRPVRP	496.824	0.04	60	2.6	12.3			0	1114.55	0	0.0451064	0	0	0	0	0	0	0	0	0	0	0	0	0	0	0	0	0	1230	0	0	5500	5530	0	0	0	0	0	0
GKGMG	449.211	0.02	60	6.1	8.75			0	1035.45	0	0.0450867	0	0	0	0	0	0	0	0	0	0	0	0	0	0	0	0	0	0	0	0	0	6220	1650	0	3520	0	0	0
QGGLAEVLLAAKEHRRPRETRVIAVLGKAGQ	1108.64	0.18	60	7	10.83			9669.24	0	#DIV/0!	0.0450349	5130	0	27200	2670	27900	0	0	29500	0	997	1310	9270	0	8800	0	51600	0	0	0	0	0	0	0	0	0	0	0	0
PN(+.98)SLESHN(+.98)DFANMELS	452.441	0.04	60	1	4.13		Deamidation (NQ)	0	723.273	0	0.0448482	0	0	0	0	0	0	0	0	0	0	0	0	0	0	0	0	0	986	0	0	0	0	2800	0	4170	0	0	0
SSSYSKQFTSSTSYN(+.98)RGDSTFESKS	923.744	0.05	5.8	7.3	8.16	sp|P02671|FIBA_HUMAN	Deamidation (NQ)	16081.2	2121.82	7.57896	0.0448318	69100	9690	18000	24200	0	6650	7850	0	2640	0	0	27900	5050	17100	68000	0	17200	1060	0	0	0	0	6930	0	5570	8470	1310	0
FLHPHLLVLGVAVVLALGAALVNVQIPLLLGQLVEVV	960.086	0.03	5.51	10.7	5.98			320.571	976.636	0.328239	0.0448163	0	515	57.7	0	908	609	0	0	0	0	0	1840	1370	0	150	0	0	642	2590	0	520	1740	2780	0	1980	0	491	0
HIKILTR	440.794	0.02	60	6.1	11			2570	0	#DIV/0!	0.0447479	5560	15200	5460	0	0	0	0	0	4900	0	0	0	5180	4060	3330	0	0	0	0	0	0	0	0	0	0	0	0	0
LHAGLIIGILILVLIVATAILVT	780.51	0.23	60	5	6.74			10506.5	0	#DIV/0!	0.0444742	0	7590	58200	13500	35900	0	0	0	31000	11800	7010	9710	3900	0	0	0	0	0	0	0	0	0	0	0	0	0	0	0
GDFLAEGGGVR	539.269	0.17	8.13	7.2	4.37	sp|P02671|FIBA_HUMAN		370059	10172.7	36.3775	0.0443632	2040000	139000	12700	1300000	22600	15400	505000	12900	17400	175000	118000	582000	120000	83000	894000	121000	133000	3820	7440	9190	6210	52900	5570	8350	4230	0	9730	4460
TGGSSYTCSCLPGFSGDGQACQDVDECQPS	750.546	0.01	60	3.4	3.37			0	2444	0	0.0443183	0	0	0	0	0	0	0	0	0	0	0	0	0	0	0	0	0	6740	0	0	0	0	3800	0	15400	0	0	944
VGAGVVLMLIILVALLMLVFRSKREVKRQ(+.98)KYRLSQ(+.98)L	1036.39	0.01	60	8.7	11.58		Deamidation (NQ)	1237.65	0	#DIV/0!	0.0441741	0	0	0	2700	2740	5520	2000	0	0	0	0	0	5380	0	0	2700	0	0	0	0	0	0	0	0	0	0	0	0
HTAGAK	584.321	0.06	60	9.3	8.76			1310	0	#DIV/0!	0.0440933	0	0	0	0	0	0	0	0	4210	1220	6060	4430	3260	3090	0	0	0	0	0	0	0	0	0	0	0	0	0	0
YPPLRL	758.461	0.08	3.76	9	8.75			1123.41	3544.64	0.316933	0.0439663	556	2550	0	1650	1620	366	510	0	2440	514	0	441	0	341	3580	0	4530	2130	2580	1060	2840	0	13000	3860	0	2140	181	11200
E(-18.01)AKKKSKAEKEKGKTKQ(+.98)EKLKEKVKREK	832.003	0.02	60	6.7	10.07		Pyro-glu from E; Deamidation (NQ)	864.706	3294.55	0.262466	0.043931	0	0	0	0	2230	0	0	0	0	0	1730	2360	0	0	8380	0	0	0	1340	0	0	7800	0	4370	6770	0	11300	4660
Q(-17.03)GSLGNFS	396.677	0.02	60	4	5.52		Pyro-glu from Q	0	6381.82	0	0.0437577	0	0	0	0	0	0	0	0	0	0	0	0	0	0	0	0	0	15000	0	39300	0	15900	0	0	0	0	0	0
GKASIKLSET	517.303	0.03	60	11.6	8.59			0	3148.18	0	0.0436847	0	0	0	0	0	0	0	0	0	0	0	0	0	0	0	0	0	0	0	17800	0	0	4330	12500	0	0	0	0
MVAVIVYRL	532.322	0.05	60	7.9	8.5			1523.53	12910.9	0.118003	0.0435992	0	0	0	0	0	0	0	0	0	0	0	0	0	0	0	0	25900	0	0	0	54400	1400	0	41800	0	6220	0	38200
HLRGLVS	781.467	0.04	4.87	10.9	9.76			447.535	2702.64	0.165592	0.0435413	4340	0	0	0	0	0	0	0	0	646	2370	171	81.1	0	0	0	0	3660	0	0	14500	953	443	4120	2890	947	226	1990
DNEEGFFSARGHRPLDK	494.491	0.02	60	7.5	5.48	sp|P02675|FIBB_HUMAN		0	1052.73	0	0.0433389	0	0	0	0	0	0	0	0	0	0	0	0	0	0	0	0	0	2230	0	0	0	0	6430	0	2920	0	0	0
LAETLKREKLKVAN(+.98)KIESIPVKGIIPSKKTKQKEV	987.099	0.01	5.26	9.4	10.1		Deamidation (NQ)	67.6471	937.273	0.0721744	0.0432947	0	0	0	0	0	1150	0	0	0	0	0	0	0	0	0	0	0	0	1770	0	1820	0	0	5420	0	1300	0	0
GKSSSYSKQFTSSTSYNRGDSTFESKSYKMADEAGSEADHEGTHST	994.839	0.03	60	3	5.46	sp|P02671|FIBA_HUMAN		1092.35	0	#DIV/0!	0.0432092	3420	0	4340	0	0	3830	0	1860	1080	0	0	0	0	0	0	4040	0	0	0	0	0	0	0	0	0	0	0	0
PQVKGGAL	769.466	0.21	2.93	5.7	9.18			3692.41	7717.18	0.478466	0.0431581	7800	882	3510	5000	0	4050	11400	1420	1310	496	604	4520	0	5090	6470	299	9920	3930	1950	9170	489	3600	2170	16400	17500	2780	11600	15300
RIHWESASLLR	456.59	0.13	60	4	9.61	sp|P01024|CO3_HUMAN		951.235	0	#DIV/0!	0.0430727	0	0	991	0	5300	2290	1550	0	0	0	1560	0	1560	0	0	2920	0	0	0	0	0	0	0	0	0	0	0	0
RPLGPEKLLDGPPGVDVTLLPAPPARLQ(+.98)V	1006.28	0.11	4.49	6.7	6.12		Deamidation (NQ)	3780.53	695.091	5.4389	0.0429414	2350	0	3660	15300	4190	1950	6680	3890	0	1390	13700	789	1510	5650	1220	1990	0	0	0	0	0	666	6980	0	0	0	0	0
E(-18.01)RSLRPYSLVRPLLV	890.533	0.12	4.52	8.1	10.74		Pyro-glu from E	2977.94	1212.27	2.45649	0.0428132	0	6270	5120	0	3370	2910	0	4970	2610	1860	5350	292	7580	0	3650	6030	613	599	1310	0	0	1710	0	1010	3320	2260	406	2720
GGAGGGGGGMQPGSAAVTSGAYRGDPSSVKM(+15.99)VQSDFMQ(+.98)G	727.523	0.14	6.48	7.3	5.96		Oxidation (M); Deamidation (NQ)	4276.47	754.909	5.66488	0.042808	16500	4620	0	14900	0	0	10800	0	0	6110	5240	2640	5990	0	5900	0	0	971	904	0	714	0	0	3530	0	0	1230	955
L(+42.01)GAAFAT	692.358	0.01	60	8.2	5.52		Acetylation (Protein N-term)	228.824	6409.09	0.035703	0.042508	0	0	0	0	2720	0	0	0	810	0	0	0	0	0	0	0	360	0	0	0	0	33500	0	0	25400	0	11600	0
KFSPGAPGGSGSQPNQKLGHPEALSAGTGSPQPPSFT	894.692	0.09	60	7.4	8.6	sp|Q15942|ZYX_HUMAN		2492.94	0	#DIV/0!	0.0424717	0	0	10300	0	0	12400	0	4720	5090	0	0	0	2420	3000	0	4450	0	0	0	0	0	0	0	0	0	0	0	0
PN(+.98)FELLLGPICLPLVDRFIQLLKVAQ(+.98)A	1008.25	0.17	60	5.9	6.45		Deamidation (NQ)	7105.88	0	#DIV/0!	0.042392	11800	0	0	0	0	0	0	0	13300	0	0	0	11900	11600	6700	32300	33200	0	0	0	0	0	0	0	0	0	0	0
MALWSCT	406.179	0.03	60	9.6	5.27			0	1476.09	0	0.0421393	0	0	0	0	0	0	0	0	0	0	0	0	0	0	0	0	0	0	0	0	857	9380	0	2820	3180	0	0	0
PPALGLLVAAGVAGAALLLVH	962.096	0.09	4.3	5.8	7.17			1720.59	581.818	2.95726	0.0421372	0	0	2110	2610	0	4640	3070	3180	1780	1720	0	2740	1620	4060	1720	0	0	0	1110	0	2850	0	0	0	0	0	2440	0
GNALVVDPKK	1040.61	0.06	5.58	7.9	8.59			195.9	541.909	0.3615	0.0421148	0	308	0	783	197	0	62.1	0	37.2	0	218	626	0	0	459	280	360	367	1200	0	1030	1020	1700	0	478	166	0	0
KAGGR	488.29	0.02	60	9.9	11			0	258.273	0	0.0419164	0	0	0	0	0	0	0	0	0	0	0	0	0	0	0	0	0	0	1540	0	500	801	0	0	0	0	0	0
PPPKK	566.38	0.12	6.71	8.5	10.02	sp|P21817|RYR1_HUMAN		2503	13.3636	187.299	0.0418872	291	0	0	6350	0	0	8510	9310	7890	0	0	0	0	8820	0	1380	0	0	0	0	0	0	0	147	0	0	0	0
SRATRPSAGITG	587.312	0.01	60	17.6	12			42.7059	887.273	0.0481316	0.0418275	0	0	0	0	0	0	0	0	0	0	0	0	0	0	0	0	726	4760	0	0	0	0	0	0	2620	2380	0	0
KKIKN	630.435	0.06	60	5.9	10.3			665.176	0	#DIV/0!	0.0418127	0	0	1130	895	4190	1120	838	0	0	477	0	683	0	835	0	1140	0	0	0	0	0	0	0	0	0	0	0	0
LKGALLFITIALIGTGWAFIKHILSDKDKKIF	893.545	0.01	60	6.5	9.83			1580.59	0	#DIV/0!	0.0416908	0	7620	3710	0	0	0	0	1890	0	0	0	1590	0	2160	0	6590	3310	0	0	0	0	0	0	0	0	0	0	0
TAQSGN	577.249	0.27	60	1.8	5.19			9946.47	0	#DIV/0!	0.0416855	0	2080	0	0	0	0	0	9730	35600	1500	14700	0	16400	7080	0	49900	32100	0	0	0	0	0	0	0	0	0	0	0
Q(-17.03)AGAAGSRMNFRPGVLSS	596.964	0.06	60	4.1	12		Pyro-glu from Q	4494.12	0	#DIV/0!	0.0415359	17300	5060	0	0	0	21100	0	11900	0	0	0	0	0	7120	2120	11800	0	0	0	0	0	0	0	0	0	0	0	0
NDNEEGFFSARGH	493.878	0.06	60	5.3	4.65	sp|P02675|FIBB_HUMAN		52.8824	1964.55	0.0269184	0.0415084	0	0	0	0	0	0	899	0	0	0	0	0	0	0	0	0	0	5050	0	0	0	0	5360	0	11200	0	0	0
EEKCTYIVN(+.98)DHPWDSGADGGTSVQ(+.98)AEASL	1027.77	0.32	60	8.9	4.01		Deamidation (NQ)	12150	0	#DIV/0!	0.0414622	41100	9790	0	49900	0	0	51100	0	0	0	4540	18800	2820	0	28500	0	0	0	0	0	0	0	0	0	0	0	0	0
QKLPHLK	432.28	0.03	60	8	10			118.465	0	#DIV/0!	0.0414289	0	136	0	671	234	380	0	0	87.9	0	0	0	189	100	0	216	0	0	0	0	0	0	0	0	0	0	0	0
SETESRGSESGIFTN(+.98)TKESSSHHPGIAEFPSRG	702.129	0.03	5.52	5.3	5.44	sp|P02671|FIBA_HUMAN	Deamidation (NQ)	6061.18	96.3636	62.899	0.0412927	0	3600	2340	0	6700	25000	0	28500	1560	0	0	2470	4340	19900	0	3180	5450	0	0	0	0	0	0	0	0	1060	0	0
CSPDTGSC	385.127	0.1	60	2.6	3.8			538.588	0	#DIV/0!	0.0412839	0	742	0	2250	0	0	1390	0	0	2190	1590	0	0	0	0	994	0	0	0	0	0	0	0	0	0	0	0	0
CADHFADGRCDQ(+.98)GCN	806.776	0.11	60	6.1	4.41		Deamidation (NQ)	1194.12	0	#DIV/0!	0.0411146	0	1560	0	3880	0	0	3840	4370	4810	0	0	0	0	1840	0	0	0	0	0	0	0	0	0	0	0	0	0	0
SYSKQFTSSTSYNRGDSTFES	793.681	0.3	60	4.3	5.79	sp|P02671|FIBA_HUMAN		7871.18	0	#DIV/0!	0.0411046	11100	2300	1950	5040	5080	3740	4660	0	3920	4300	2160	7800	9000	10300	2100	53100	7260	0	0	0	0	0	0	0	0	0	0	0
LVPILLVTLVFT	664.42	0.07	60	7.5	5.52			623.529	3884.55	0.160515	0.0410808	0	0	0	0	10600	0	0	0	0	0	0	0	0	0	0	0	0	10800	9130	0	11400	11400	0	0	0	0	0	0
ALTDMPQM(+15.99)RMELERPGGNEITR	641.061	0.02	5.32	7.6	4.87	sp|P02671|FIBA_HUMAN	Oxidation (M)	420.941	5290.91	0.0795593	0.0410651	0	0	0	0	816	0	0	0	0	0	3710	0	0	0	0	0	2630	0	0	0	0	0	23100	0	13600	21500	0	0
ATGPPGEEGPRGP	611.292	0.02	60	8.8	4.53			0	250.818	0	0.0410626	0	0	0	0	0	0	0	0	0	0	0	0	0	0	0	0	0	402	0	937	1420	0	0	0	0	0	0	0
LPGDQ(+.98)GEPGSPGP	403.517	0.05	60	3	3.67		Deamidation (NQ)	0	839.182	0	0.0408939	0	0	0	0	0	0	0	0	0	0	0	0	0	0	0	0	0	0	441	0	5130	0	0	0	2520	0	0	1140
SKART	562.326	0.01	60	4	11			0	4095.45	0	0.04087	0	0	0	0	0	0	0	0	0	0	0	0	0	0	0	0	0	0	0	0	3670	1480	0	0	19000	20900	0	0
HAMCPISAGSRPLEFFPDDDCT	803.679	0.03	60	6.9	4.22			122.471	5115.45	0.0239413	0.0407057	0	0	0	0	0	0	0	0	0	0	0	0	1210	0	0	872	0	0	0	0	0	0	21100	0	26400	8770	0	0
TPVGG	430.235	0.01	60	10.5	5.19			2087.65	0	#DIV/0!	0.0405188	0	0	0	5570	0	0	0	0	6420	4090	9940	3270	6200	0	0	0	0	0	0	0	0	0	0	0	0	0	0	0
AKTVQ(+.98)GGR	409.236	0.04	60	2.6	11		Deamidation (NQ)	0	1382.73	0	0.0404194	0	0	0	0	0	0	0	0	0	0	0	0	0	0	0	0	0	0	8260	0	0	3500	3450	0	0	0	0	0
STASSPAPEEN(+.98)APSEGQRVWGQ(+.98)GQSPRPEN	788.855	0.03	60	10.3	4.49		Deamidation (NQ)	0	856.364	0	0.0403292	0	0	0	0	0	0	0	0	0	0	0	0	0	0	0	0	0	0	3600	0	0	1250	4570	0	0	0	0	0
PPYLTVGT	424.238	0.03	60	4.5	5.95			0	966.364	0	0.0403026	0	0	0	0	0	0	0	0	0	0	0	0	0	0	0	0	0	0	5740	0	2150	0	0	0	0	0	2740	0
RIIGLD	686.42	0.03	60	8.6	5.84			230.765	712.273	0.323984	0.0400858	0	0	0	0	951	0	1370	495	0	0	0	0	0	0	384	0	723	0	0	1340	0	1020	0	260	2270	1170	1340	435
Q(+.98)HECSAGSSQDHPPPGA	569.25	0.01	60	7.5	5.15		Deamidation (NQ)	55.5294	899.091	0.0617617	0.040074	0	0	0	0	0	944	0	0	0	0	0	0	0	0	0	0	0	2170	0	0	3840	0	0	3880	0	0	0	0
AAGSAAASAGGAGGAGGGGPASAGGGGGGGGGGGGGGAAGAG	909.396	0.01	60	8.9	5.57			18.4706	2661.82	0.00693909	0.0399147	0	0	0	314	0	0	0	0	0	0	0	0	0	0	0	0	0	719	0	0	0	1760	0	0	13200	12600	660	341
TVTLEHQKE	542.78	0.01	60	4.6	5.37			0	313	0	0.0398074	0	0	0	0	0	0	0	0	0	0	0	0	0	0	0	0	0	0	0	0	0	593	1040	1810	0	0	0	0
GDSGDDSDSEHGDGT	725.741	0.08	60	4	3.61	sp|Q9P1Y6|PHRF1_HUMAN		55759.4	0	#DIV/0!	0.039511	0	138000	5550	0	0	0	33300	72100	6460	0	141000	332000	52500	65500	0	52800	48700	0	0	0	0	0	0	0	0	0	0	0
ERGGAGGM(+15.99)Q(+.98)Q(+.98)GSSPAPDSCQPGPGPSPG	646.772	0.03	60	1	4.37		Oxidation (M); Deamidation (NQ)	0	1169.09	0	0.0394609	0	0	0	0	0	0	0	0	0	0	0	0	0	0	0	0	0	0	0	0	5070	0	0	6070	0	0	1720	0
GAPAQLPLVLT	1079.66	0.16	5.99	7.4	5.52			1140.06	212.636	5.36157	0.0393485	2240	250	499	0	1350	151	89.1	1250	281	116	244	124	687	1230	3080	2830	4960	487	0	0	272	845	0	0	486	249	0	0
HGILLIT	766.471	0.01	60	8	6.74			129.906	1095.45	0.118586	0.0392555	0	0	0	0	98.4	0	0	2110	0	0	0	0	0	0	0	0	0	0	727	278	123	1590	5630	2820	0	0	748	134
E(-18.01)KKAGK	642.404	0.01	60	7.2	9.71		Pyro-glu from E	0	2171.82	0	0.0390937	0	0	0	0	0	0	0	0	0	0	0	0	0	0	0	0	0	0	9330	0	0	0	0	0	0	0	11300	3260
PGSPGNIGPAGKEGP	667.831	0.02	60	3.1	6.43			0	586.364	0	0.0390566	0	0	0	0	0	0	0	0	0	0	0	0	0	0	0	0	0	1600	0	1400	0	0	0	3450	0	0	0	0
GLVPQALP	397.741	0.03	60	7	5.52			0	6245.45	0	0.0389411	0	0	0	0	0	0	0	0	0	0	0	0	0	0	0	0	0	0	36500	18400	0	0	0	0	13800	0	0	0
LHPPPRGPFPPGDIF	822.449	0.04	5.55	8.2	6.74			7190	954.545	7.53238	0.0389218	0	0	0	0	0	28100	11400	16500	21900	12200	15500	0	0	10200	6430	0	0	0	0	0	0	0	0	10500	0	0	0	0
AGATARVVAAAGRALRGLSYRSLRRRVRRLRRLT	952.324	0.04	3.31	11.5	12.65	sp|P21817|RYR1_HUMAN		577.541	89.3636	6.46282	0.0388221	0	0	0	0	0	2060	559	1090	0	70.2	1600	978	0	330	1590	301	1240	0	0	0	983	0	0	0	0	0	0	0
AEEVHSDPCENNPCLHGGTCNANGT	643	0.08	60	7.7	4.39			994.706	0	#DIV/0!	0.0388003	0	1120	0	0	0	0	0	3130	4320	2960	2960	0	2420	0	0	0	0	0	0	0	0	0	0	0	0	0	0	0
TLDPERLGREGVQK	400.222	0.05	60	1.9	5.85	sp|P01024|CO3_HUMAN		0	1680	0	0.038705	0	0	0	0	0	0	0	0	0	0	0	0	0	0	0	0	0	4440	0	0	0	0	4180	0	9860	0	0	0
LPVATRAVLITG	605.874	0.06	60	5.8	9.75			762.529	0	#DIV/0!	0.0384716	0	0	0	0	2610	0	0	0	0	2270	0	3280	0	923	2040	0	1840	0	0	0	0	0	0	0	0	0	0	0
CVIFVRILQ	545.831	0.07	5.91	6	8.25			417.647	7370	0.0566685	0.038315	0	0	0	0	0	0	0	0	0	0	0	0	0	0	0	7100	0	7820	0	0	36800	4620	0	29500	0	2330	0	0
NLARLIIVK	520.34	0.08	60	11.7	11			875.588	0	#DIV/0!	0.038251	1150	2290	0	0	0	0	0	0	0	244	1710	1180	0	4150	0	641	3520	0	0	0	0	0	0	0	0	0	0	0
HYGHG	570.237	0.05	60	3.4	6.92			0	668.455	0	0.0382352	0	0	0	0	0	0	0	0	0	0	0	0	0	0	0	0	0	0	812	0	2260	0	371	3910	0	0	0	0
RGAASKVKVPM	1143.66	0.04	60	8.2	11.17			482.176	81	5.9528	0.0379876	0	113	0	1120	1610	0	696	1710	861	683	590	184	0	0	630	0	0	0	0	0	0	777	0	0	0	114	0	0
S(+42.01)DKPDM(+15.99)AEIEKFDKSKLKKTET	526.07	0.22	8.71	3.3	6.03	sp|P62328|TYB4_HUMAN	Acetylation (Protein N-term); Oxidation (M)	6365.41	51.5455	123.491	0.0378247	0	0	18400	0	27900	17400	0	0	0	0	642	0	0	8570	0	14700	20600	0	0	0	0	0	0	0	0	567	0	0
IVGLLAILDRRNKGVPAGLEPVVVGM(+15.99)LIL	761.201	0.01	5.07	8.7	8.75		Oxidation (M)	128.171	1539.09	0.0832768	0.0377674	0	0	0	0	0	0	0	0	0	2130	48.9	0	0	0	0	0	0	0	0	0	8590	1210	3030	2790	0	0	1310	0
PADKCMPCSCHPQGS	780.791	0.22	60	6.5	7.05			6346.47	0	#DIV/0!	0.0377224	0	0	0	29200	0	0	23100	0	0	0	0	19100	4670	8040	15300	0	8480	0	0	0	0	0	0	0	0	0	0	0
GLIFI	562.376	0.24	60	4.8	5.52			5132.35	0	#DIV/0!	0.0377008	0	0	10100	0	21400	19100	0	0	0	0	0	0	0	8750	0	16300	11600	0	0	0	0	0	0	0	0	0	0	0
SSYSKQFTSSTSY	736.832	0.03	60	9.6	8.22	sp|P02671|FIBA_HUMAN		1389.59	0	#DIV/0!	0.0375392	6560	1600	0	1520	3820	0	4620	0	0	0	975	0	0	318	0	4210	0	0	0	0	0	0	0	0	0	0	0	0
NPGGDFGKKELSP	673.34	0.16	60	5.5	6.07			2638.82	0	#DIV/0!	0.0375264	6210	0	0	8080	0	0	10500	0	0	3630	2320	0	0	0	2720	0	11400	0	0	0	0	0	0	0	0	0	0	0
NDNEEGFFSARGHRPLDK	523.001	0.02	60	0.2	5.48	sp|P02675|FIBB_HUMAN		0	1484.55	0	0.0374554	0	0	0	0	0	0	0	0	0	0	0	0	0	0	0	0	0	2310	0	0	0	0	7330	0	6690	0	0	0
LPLLQPQ(+.98)LLQ(+.98)PPPPPPPLL	1035.63	0.07	5.76	7.2	5.52		Deamidation (NQ)	2577.05	177.818	14.4926	0.0373787	1510	1580	0	0	1380	2030	1820	448	8300	2890	3750	71.8	4030	0	13900	2100	0	680	0	0	360	0	0	916	0	0	0	0
Q(-17.03)PPGGFAPAAINRSIPCKVI	673.709	0.08	60	5.4	9.51		Pyro-glu from Q	2767.65	9831.82	0.281499	0.0373592	0	0	14100	8380	0	0	0	0	0	3340	8830	0	0	0	12400	0	0	25700	0	34800	0	15200	15000	9650	0	0	0	7800
SFCSN(+.98)GVTHRNQ	450.861	0.03	60	2.8	7.99		Deamidation (NQ)	0	745.455	0	0.0373573	0	0	0	0	0	0	0	0	0	0	0	0	0	0	0	0	0	0	0	2950	0	0	0	3980	0	0	0	1270
HGLRRRR	950.572	0.19	4.09	8.5	12.48			1866.24	6291	0.296652	0.0373572	2860	1430	496	7330	5890	4770	1430	1010	613	342	1110	493	115	193	3480	0	164	4910	341	0	17700	3990	1420	8270	24700	4770	1130	1970
GAN(+.98)ENSAENM(+15.99)Q	591.222	0.04	60	4.3	3.79		Deamidation (NQ); Oxidation (M)	0	2395.45	0	0.0372726	0	0	0	0	0	0	0	0	0	0	0	0	0	0	0	0	0	7370	0	0	13700	0	0	5280	0	0	0	0
LLSPLLLLLVGGA	639.917	0.07	60	4.2	5.52			453.529	0	#DIV/0!	0.0372677	0	2060	0	0	0	0	730	1160	1410	0	1040	0	1310	0	0	0	0	0	0	0	0	0	0	0	0	0	0	0
KRSHGTSPGACPPPRSQ(+.98)TP	491.24	0.03	60	7.1	10.86		Deamidation (NQ)	0	583.455	0	0.0372494	0	0	0	0	0	0	0	0	0	0	0	0	0	0	0	0	0	446	0	672	1840	0	0	0	3460	0	0	0
DEYECACNCVNST	725.743	0.07	6.19	7	3.57			15256.9	452.545	33.7136	0.0370637	0	4590	1970	83600	0	0	0	18700	598	0	29300	8110	0	12000	33600	37400	29500	0	0	1860	0	727	0	0	0	0	1850	541
TKEQVTNVGGAVVTGVT	830.447	0.08	60	7.4	5.66			962.235	0	#DIV/0!	0.0370622	0	0	518	0	0	0	0	0	0	1390	810	0	1520	2590	1780	2470	5280	0	0	0	0	0	0	0	0	0	0	0
QM(+15.99)LKSKHGGNYLLFNLS	492.27	0.02	60	5.7	9.7		Oxidation (M)	0	494.182	0	0.0370552	0	0	0	0	0	0	0	0	0	0	0	0	0	0	0	0	0	886	0	0	1870	0	0	0	0	0	2680	0
KGKEEKAKK	523.325	0.03	60	2.8	9.83			406.471	6118.18	0.0664365	0.0368782	0	0	0	0	0	6910	0	0	0	0	0	0	0	0	0	0	0	22600	3100	29500	0	0	0	0	0	0	0	12100
HGGKKLFK	914.563	0.19	2.22	7.9	10.3			585	1827.09	0.320181	0.0368345	359	705	384	222	745	0	1020	971	2080	113	0	204	889	452	1510	291	0	1120	1020	0	1340	1010	3020	327	3300	517	644	7800
E(-18.01)GDFLAEGGGVR	594.786	0.1	60	2.4	4.14	sp|P02671|FIBA_HUMAN	Pyro-glu from E	58191.2	0	#DIV/0!	0.0367956	288000	23600	1380	129000	0	0	66400	0	0	11500	14100	109000	49800	9670	242000	24400	20400	0	0	0	0	0	0	0	0	0	0	0
LQPIPASPPPQIPPGLRPRFCA	1176.67	0.02	60	9.9	10.35			1225.88	4848.18	0.252854	0.0367285	0	0	0	13700	0	0	0	0	0	1230	0	4120	0	0	0	0	1790	0	2980	0	6020	12600	6440	4810	4480	0	16000	0
HAALHIL	774.47	0.01	5.22	10.8	6.92			148.353	7017.82	0.0211395	0.0367053	0	0	0	0	206	0	0	0	0	2100	0	0	216	0	0	0	0	616	0	0	19400	0	555	40000	299	379	147	15800
QALAGAELR	464.757	0.03	60	14.9	6			0	205.273	0	0.0366266	0	0	0	0	0	0	0	0	0	0	0	0	0	0	0	0	0	0	893	0	0	0	0	0	0	1030	335	0
GFIKSIRGV	976.579	0.03	5	10.9	11			190.882	1253.18	0.152318	0.036586	0	0	0	0	0	959	21	0	0	122	757	0	0	667	0	719	0	111	613	0	2350	2910	0	0	6330	1080	391	0
DEDDKGWPEN(+.98)Q(+.98)LDMSDYSSSYQDVAC	1000.39	0.06	60	3	3.5		Deamidation (NQ)	0	1332.73	0	0.0363304	0	0	0	0	0	0	0	0	0	0	0	0	0	0	0	0	0	0	0	0	0	0	2910	0	7510	4240	0	0
GLDPQ(+.98)GAADCA	509.7	0.05	60	2.3	3.56		Deamidation (NQ)	0	484.091	0	0.0362392	0	0	0	0	0	0	0	0	0	0	0	0	0	0	0	0	0	0	0	851	827	0	0	3020	0	0	627	0
SVIQ(+.98)KAVRHFLL	706.429	0.02	4.33	9.7	11		Deamidation (NQ)	484.706	2091.09	0.231796	0.0361934	0	0	0	0	3680	0	2150	0	0	1140	1270	0	0	0	0	0	0	0	0	0	2730	1460	4240	6680	0	0	7070	822
AVSTFAK	723.405	0.01	60	9	8.8			0	1898.18	0	0.0361547	0	0	0	0	0	0	0	0	0	0	0	0	0	0	0	0	0	8330	0	0	3140	0	0	9410	0	0	0	0
TVPVALPIQQ	533.321	0.03	60	8.3	5.19			1210.29	0	#DIV/0!	0.0360141	0	0	4910	397	1180	4540	0	4890	699	1420	0	0	559	1980	0	0	0	0	0	0	0	0	0	0	0	0	0	0
ILVGN(+.98)HSSRLGGVARY	567.312	0.02	60	1.9	10.84		Deamidation (NQ)	0	2555.45	0	0.036013	0	0	0	0	0	0	0	0	0	0	0	0	0	0	0	0	0	0	0	0	0	0	11500	4210	0	0	0	12400
AVSGNETSTTTTQ(+.98)Q(+.98)VATPGTTM(+15.99)F	783.345	0.02	60	6.6	4		Deamidation (NQ); Oxidation (M)	1332.35	0	#DIV/0!	0.0359328	0	0	0	2970	0	0	4320	1000	6650	2930	1920	0	2860	0	0	0	0	0	0	0	0	0	0	0	0	0	0	0
NDPVMGTH	435.69	0.03	60	2.1	5.08			0	892.727	0	0.0358677	0	0	0	0	0	0	0	0	0	0	0	0	0	0	0	0	0	0	0	4330	0	0	4010	0	0	0	0	1480
VGIVAGLAVLAVVVIGAVVAAVMCR	784.146	0.01	60	11	8.22			284.706	1328.81	0.214256	0.0357675	875	0	0	231	0	0	0	0	354	0	3380	0	0	0	0	0	0	1810	843	80.9	0	2700	0	3760	0	0	4570	853
LGIARPRV	441.295	0.03	60	3.9	12			0	683.636	0	0.0355829	0	0	0	0	0	0	0	0	0	0	0	0	0	0	0	0	0	0	1140	0	0	0	3220	0	3160	0	0	0
VAPLAITYVREKVI	786.486	0.06	3.28	9.4	8.56			215.294	590.182	0.364793	0.035565	0	811	298	0	0	885	0	199	0	0	0	0	1020	0	447	0	0	1160	0	0	1500	550	1150	1060	485	0	187	400
G(+42.01)SGSGGGGSGGGGGGGSS	413.165	0.12	60	6.1	5.52		Acetylation (Protein N-term)	2895.29	0	#DIV/0!	0.0354529	12500	7220	0	10400	0	0	8360	0	0	0	2650	6500	1590	0	0	0	0	0	0	0	0	0	0	0	0	0	0	0
YGNQ(+.98)DQSGGGGSGGY	702.741	0.03	60	7.5	3.8		Deamidation (NQ)	2247.06	0	#DIV/0!	0.0354338	11200	0	0	0	0	0	6930	0	0	2110	5520	0	3810	2940	5690	0	0	0	0	0	0	0	0	0	0	0	0	0
ALTDMPQM(+15.99)RM(+15.99)ELERPGGNEITR	645.066	0.03	60	9.9	4.87	sp|P02671|FIBA_HUMAN	Oxidation (M)	0	2427.27	0	0.0352904	0	0	0	0	0	0	0	0	0	0	0	0	0	0	0	0	0	0	0	0	0	0	13100	0	8820	4780	0	0
GHRPLDKKREEAPSLRPAPPPISGGGY	577.312	0.27	60	4.9	9.69	sp|P02675|FIBB_HUMAN		30655.9	0	#DIV/0!	0.0350087	0	2160	51500	1390	69100	126000	1830	4970	3370	0	0	10200	13300	41700	2030	146000	47600	0	0	0	0	0	0	0	0	0	0	0
SSSYSKQFTSSTSYNRGDSTFESKSYKMADEAG	909.151	0.05	60	6.6	5.94	sp|P02671|FIBA_HUMAN		1628.24	0	#DIV/0!	0.0348002	7070	0	0	0	0	0	5550	0	3670	0	0	3810	3360	4220	0	0	0	0	0	0	0	0	0	0	0	0	0	0
EAAGAGAGPG	757.339	0.33	60	3.8	4			2481.18	0	#DIV/0!	0.034751	0	0	0	0	0	0	5480	0	9480	0	6970	0	4780	9860	0	5610	0	0	0	0	0	0	0	0	0	0	0	0
GFVTLGRLAK	531.336	0.06	60	5.1	11			922.353	0	#DIV/0!	0.0346106	1980	3920	0	0	0	3080	0	0	0	0	0	2380	0	0	2610	1710	0	0	0	0	0	0	0	0	0	0	0	0
SSLVKNAIQ	480.284	0.04	60	12.7	8.47			704.118	0	#DIV/0!	0.0342286	0	0	1220	0	0	2450	0	2340	0	0	0	1560	0	1660	0	2740	0	0	0	0	0	0	0	0	0	0	0	0
E(-18.01)GRIRLPRKATKTKKN	939.57	0.08	3.29	9.1	11.74		Pyro-glu from E	296.353	1027.91	0.288307	0.034141	0	1560	342	0	0	104	977	0	456	337	311	0	0	0	576	0	375	2020	688	0	4270	1200	1210	0	140	911	868	0
QN(+.98)LNEDVSQEESPSLIAGN(+.98)PQGPSP	653.039	0.05	60	5.7	3.5		Deamidation (NQ)	852.353	0	#DIV/0!	0.0341346	0	0	3270	0	0	0	0	0	0	1310	2810	2920	2160	0	2020	0	0	0	0	0	0	0	0	0	0	0	0	0
GAAGLLALLLLLLLLLLGLGGRVEGG	829.195	0.1	60	6.2	6			1638.29	0	#DIV/0!	0.0340593	3070	0	7660	1490	5240	0	0	0	5570	1310	0	0	0	0	741	2770	0	0	0	0	0	0	0	0	0	0	0	0
Q(+.98)NEGQGVGEINMATSGN(+.98)GQ(+.98)GSTTRMDHETAS	634.263	0.13	6.36	5.4	4.4		Deamidation (NQ)	6920.59	518.182	13.3555	0.0340096	0	0	0	0	26700	0	0	3100	5030	9320	19300	17300	15400	0	0	0	21500	0	0	0	0	0	0	0	0	5700	0	0
KTETQEKNPLPSKETIEQEKQAGES	566.688	0.06	60	2	4.77	sp|P62328|TYB4_HUMAN		990	5872.73	0.168576	0.0338103	0	0	0	0	0	10000	0	0	0	0	0	0	0	0	0	0	6830	9860	0	0	0	6200	15600	0	25200	0	7740	0
HVNSAHPGSSFLKKTSKKLAALLQ(+.98)GK	916.855	0.07	60	6	10.6		Deamidation (NQ)	2501.18	0	#DIV/0!	0.0338059	0	2970	11200	0	0	6300	0	3040	6570	0	0	9300	0	3140	0	0	0	0	0	0	0	0	0	0	0	0	0	0
GPQ(+.98)GVRGEPGP	526.275	0.03	60	13.5	6		Deamidation (NQ)	0	945.182	0	0.0337354	0	0	0	0	0	0	0	0	0	0	0	0	0	0	0	0	0	0	0	2340	0	0	477	5560	0	2020	0	0
GPPDVPDHAAYHPF	507.237	0.19	60	3.5	5.05			8132.35	0	#DIV/0!	0.0336564	0	0	13000	0	16700	35400	0	2700	1250	0	0	0	0	15700	0	29900	23600	0	0	0	0	0	0	0	0	0	0	0
QELVVKPIKVKRKKKKKKT	769.528	0.07	60	4.1	10.87			3650	0	#DIV/0!	0.033557	0	7870	8940	0	0	13500	0	10800	2830	3010	0	0	0	15100	0	0	0	0	0	0	0	0	0	0	0	0	0	0
IFKKGSR	835.538	0.11	60	5.1	11.17			4318.24	0	#DIV/0!	0.0334331	0	0	0	18800	0	0	0	0	0	0	0	10200	12400	12300	0	8810	10900	0	0	0	0	0	0	0	0	0	0	0
KPRRAGTT	886.537	0.23	2.96	6.4	12.01			923.459	2863.55	0.322488	0.0334123	4600	624	578	323	1260	586	838	0	246	133	228	1410	808	389	370	85.8	3220	4060	1460	3030	949	940	2480	11900	851	3930	1610	289
VKEAPGKRKKEMAKQKAAPEAKKQKV	727.442	0.01	4.36	12.5	10.3			258.059	2121.36	0.121648	0.0333887	0	0	0	0	0	0	0	0	0	1310	0	2950	127	0	0	0	0	4230	0	485	0	0	5930	9940	0	0	0	2750
S(+42.01)DKPDM(+15.99)AEIEKFD	791.849	0.03	60	8.6	4.1	sp|P62328|TYB4_HUMAN	Acetylation (Protein N-term); Oxidation (M)	2049.41	0	#DIV/0!	0.0333489	0	0	4790	0	7430	4430	0	1590	0	0	0	0	0	4100	0	3040	9460	0	0	0	0	0	0	0	0	0	0	0
KKLLLLVC	465.309	0.02	60	11.6	9.31			487.882	0	#DIV/0!	0.0333455	2840	142	0	0	0	868	626	704	0	0	864	0	968	650	0	632	0	0	0	0	0	0	0	0	0	0	0	0
KPMNVGLSETQNGGM(+15.99)SQ(+.98)EAVGNI	595.266	0.1	60	4.9	4.53		Oxidation (M); Deamidation (NQ)	829.353	0	#DIV/0!	0.0333223	0	0	1900	0	0	0	0	0	1610	879	0	2410	1040	2160	0	0	4100	0	0	0	0	0	0	0	0	0	0	0
FGQCQVGVGQA	547.263	0.03	60	8.2	5.52			0	4142.73	0	0.0333084	0	0	0	0	0	0	0	0	0	0	0	0	0	0	0	0	0	0	20600	0	0	0	17100	7870	0	0	0	0
EEAGARVQQNVPSGTDTGDPQSKPLG	880.092	0.09	2.42	6.6	4.32			2357.12	848.182	2.77902	0.0332311	0	0	4740	1460	6340	4040	941	0	1120	1350	1070	1650	1840	5520	1020	3680	5300	1980	1680	1280	1490	1080	0	1820	0	0	0	0
TTQ(+.98)Q(+.98)GIQECREACGGH	573.903	0.04	60	1.6	5.37		Deamidation (NQ)	0	528.182	0	0.0331805	0	0	0	0	0	0	0	0	0	0	0	0	0	0	0	0	0	0	0	2720	0	0	1060	0	0	0	0	2030
Q(-17.03)EGSGGDYM(+15.99)PMN(+.98)NWGS	865.298	0.15	60	8	3.67		Pyro-glu from Q; Oxidation (M); Deamidation (NQ)	2218.24	0	#DIV/0!	0.0331223	5640	0	0	7580	0	0	8580	0	0	0	4960	0	3900	0	7050	0	0	0	0	0	0	0	0	0	0	0	0	0
RRLLESLRGPALDVIRVLKIN(+.98)N(+.98)PLITV	1024.29	0.12	4.37	8.3	11.54		Deamidation (NQ)	3888.65	1649.09	2.35805	0.0330862	6230	11300	0	7200	6530	3250	717	2370	3840	0	3300	1630	3040	1420	4300	5570	5410	0	1810	0	1960	3760	0	2610	5190	2810	0	0
DDDDD	594.156	0.2	7.72	4.7	3.24	sp|Q13255|GRM1_HUMAN		997.353	390.364	2.55493	0.0330344	564	751	1590	943	1020	0	894	421	0	3080	2420	1590	352	1220	911	546	653	0	918	344	137	806	0	1190	0	0	0	899
KLFRNILKEKGIVVGIKLDQ(+.98)GGAPL	903.213	0.06	60	11.2	10		Deamidation (NQ)	1181.18	0	#DIV/0!	0.0329937	0	4010	2750	0	3870	0	0	0	1640	0	0	0	1470	0	1180	0	5160	0	0	0	0	0	0	0	0	0	0	0
TNDTN(+.98)GYSSGGGGHSPSAD	594.564	0.16	60	4.1	4.2		Deamidation (NQ)	1211.76	0	#DIV/0!	0.0327467	5810	0	0	2540	2590	0	0	2190	0	1860	1360	0	0	4250	0	0	0	0	0	0	0	0	0	0	0	0	0	0
TPKGSSLKIEERAEFLN	640.341	0.05	60	7.4	5.9			405.412	0	#DIV/0!	0.0326889	0	1060	0	966	0	0	0	0	0	776	0	1040	0	1460	1590	0	0	0	0	0	0	0	0	0	0	0	0	0
IRAKKKAFNFLGEIIGLIP	1064.65	0.11	4.47	7.3	10.29			5988.24	1692.74	3.53761	0.0326175	0	4170	6460	0	3530	0	0	0	18000	3620	11700	3430	7060	13900	14100	7370	8460	60.1	0	0	7610	0	9240	0	1040	0	670	0
APAVGPRSQKQLELKVSELVQFLLIKDQKK	1131.01	0.02	60	10.4	9.82			1467.65	0	#DIV/0!	0.0324889	6160	0	0	0	1580	0	1920	5640	1550	0	5240	0	0	0	1340	0	1520	0	0	0	0	0	0	0	0	0	0	0
SLAELGGHLDQQVEEFR	643.321	0.05	60	2.2	4.4			0	3530	0	0.032467	0	0	0	0	0	0	0	0	0	0	0	0	0	0	0	0	0	0	0	0	0	0	11200	0	19000	8630	0	0
LLSVLLYAT	496.814	0.05	60	5.1	5.52			1349.41	0	#DIV/0!	0.0324077	5650	1970	0	1190	0	3130	0	0	0	0	2760	5580	0	0	2660	0	0	0	0	0	0	0	0	0	0	0	0	0
Q(-17.03)FTSSTSYN(+.98)RGDSTFESKSYKMADEAGSEADHEGTHSTKRGHAKSRPV	1050.08	0.19	60	5.6	7.03	sp|P02671|FIBA_HUMAN	Pyro-glu from Q; Deamidation (NQ)	1595.41	0	#DIV/0!	0.0323775	756	763	1120	3300	1930	1570	4030	0	0	0	0	1080	653	0	0	2690	9230	0	0	0	0	0	0	0	0	0	0	0
VAVKGQSVTLIVDCKKRVTR	734.115	0.05	3.5	6.5	10.31			1112.65	3779.09	0.294422	0.0322723	0	0	435	0	0	2620	0	0	0	0	0	650	0	5970	9240	0	0	2960	9290	2890	0	0	2210	8650	2830	0	9420	3320
TLDPERLGR	352.865	0.07	60	1.7	5.74	sp|P01024|CO3_HUMAN		0	1105.45	0	0.0322567	0	0	0	0	0	0	0	0	0	0	0	0	0	0	0	0	0	0	0	0	0	0	2120	0	4980	5060	0	0
FEKKSLEDKTERELLESY	561.79	0.08	60	7.2	4.72			4288.24	0	#DIV/0!	0.032215	0	0	17400	0	11800	6390	0	18800	7860	0	3150	0	0	3680	0	0	3820	0	0	0	0	0	0	0	0	0	0	0
CQ(+.98)EHESENSPV	630.247	0.27	60	5.7	4.24		Deamidation (NQ)	16624.8	0	#DIV/0!	0.032208	0	20200	845	976	0	0	64400	0	0	27500	0	72400	15600	0	53800	16100	10800	0	0	0	0	0	0	0	0	0	0	0
ISRPVGVSKPIGVSKPVTIGKPVGVSKPIGISKPVSVGRP	994.348	0.03	5.33	7.9	12.04			191.765	860.727	0.222794	0.0321773	0	0	0	0	0	0	0	0	0	0	0	0	1880	0	0	1380	0	2020	1730	0	856	2980	792	0	0	0	1090	0
FTSSTSYNRGDSTFESKSYKM	606.525	0.12	60	4.5	8.43	sp|P02671|FIBA_HUMAN		3390.59	0	#DIV/0!	0.0320717	14400	5930	0	15300	0	0	1680	0	0	2660	0	5270	2040	7670	2690	0	0	0	0	0	0	0	0	0	0	0	0	0
KDDSYQ(+.98)PIAAEGEIWGKFGTICREKSLEEQKGVYGEGESVDHVET	1003.89	0.14	6.85	5.7	4.44	sp|Q8N3K9|CMYA5_HUMAN	Deamidation (NQ)	9059.41	230.909	39.2337	0.0320058	9020	0	0	0	19900	0	2680	42000	22300	33000	0	0	2000	5780	0	7510	9820	0	0	0	0	0	0	0	0	2540	0	0
AGIGLLAAATQ	985.589	0.14	3.41	8.4	5.57			441.594	1056.73	0.417888	0.0319046	1870	82.1	565	539	326	443	0	0	656	233	290	2040	463	0	0	0	0	1510	1670	0	1260	0	2110	1510	2110	971	483	0
Q(-17.03)EKPSSPSPMPSSTPSPSLNLG	736.684	0.02	60	9.2	6		Pyro-glu from Q	2479.35	0	#DIV/0!	0.0318859	0	0	4650	0	6480	0	0	5530	339	0	6290	9020	0	0	0	0	9840	0	0	0	0	0	0	0	0	0	0	0
IFIAHRL	869.531	0.13	2.24	7.1	9.76			350.906	1148.09	0.305643	0.0316305	584	846	0	0	373	0	480	0	1390	257	1320	635	80.4	0	0	0	0	155	1090	477	1920	0	617	0	1590	1180	890	4710
LGGTMILVIGGIIVATLLVFIVILM(+15.99)V	895.548	0.04	5.38	9.3	5.52		Oxidation (M)	2347.65	60.2727	38.9504	0.0315563	0	7950	1180	0	2730	0	10500	0	0	5920	0	5590	0	0	0	1930	4110	0	0	0	663	0	0	0	0	0	0	0
TILTKLKAK	508.351	0.02	60	8.3	10.3			1037.18	0	#DIV/0!	0.0315357	2470	0	0	0	0	0	4410	0	2380	0	562	0	1840	0	2060	3910	0	0	0	0	0	0	0	0	0	0	0	0
MDAPQ	561.233	0.28	60	4.3	3.8			2111.18	0	#DIV/0!	0.0314517	0	0	4180	0	0	0	0	8350	3730	1500	2440	0	4480	1530	0	9680	0	0	0	0	0	0	0	0	0	0	0	0
KTKRVSARTNKARA	793.986	0.04	5.8	6.2	12.31			2682.47	62.2	43.1265	0.0314517	742	0	0	1410	6050	0	0	2420	2480	7450	4160	3650	0	2840	0	0	14400	0	0	0	0	0	0	272	346	0	66.2	0
YAAVGKVI	820.49	0.03	5.42	8.2	8.59			176.941	1158.18	0.152775	0.0314448	894	0	2010	0	0	0	0	0	0	104	0	0	0	0	0	0	0	1640	0	3350	681	0	101	5220	795	0	623	330
GPPDVPDHAAYHPFR	419.704	0.05	60	4.1	5.98			0	3269.09	0	0.0314351	0	0	0	0	0	0	0	0	0	0	0	0	0	0	0	0	0	11900	0	0	0	0	5540	0	17400	1120	0	0
PVYDSNVFAESSRPGPPGLPGNQGP	847.078	0.02	60	5.8	4.37			1028.24	0	#DIV/0!	0.0313856	0	880	0	0	0	0	1930	0	0	2510	2020	5070	2590	0	2480	0	0	0	0	0	0	0	0	0	0	0	0	0
KQ(+.98)PETSEDLGKN(+.98)ILPSASTEQ(+.98)SGD	845.389	0.07	4.92	7.4	4.18		Deamidation (NQ)	3643.53	588.182	6.19456	0.0313543	2160	5150	0	0	4600	3740	0	14600	2850	0	11600	0	3510	3150	4910	5670	0	0	0	0	0	0	0	0	6470	0	0	0
VKALGGLLGRQVLVFN(+.98)C	894.544	0.04	60	8.8	9.51		Deamidation (NQ)	317.118	2456	0.12912	0.0310418	617	412	0	2010	260	0	0	0	545	0	0	227	0	0	0	0	1320	6510	340	0	5110	1530	0	1150	11900	476	0	0
QQHFWTSASEGPSRCPAM(+15.99)TVLPSE	666.316	0.03	60	5.6	5.4		Oxidation (M)	1605.88	0	#DIV/0!	0.030946	0	0	2370	0	5190	4200	0	0	0	0	0	2240	1200	0	0	5980	6120	0	0	0	0	0	0	0	0	0	0	0
QKRRRPRYRKRLRS	489.817	0.02	60	10.4	12.4			0	841.818	0	0.0309037	0	0	0	0	0	0	0	0	0	0	0	0	0	0	0	0	0	3020	0	0	1930	0	0	0	4310	0	0	0
L(+42.01)LLPGPPP	845.525	0.06	5.38	6.5	5.52		Acetylation (Protein N-term)	174.294	1173.91	0.148473	0.0308931	644	0	0	0	1340	372	0	0	0	0	0	125	281	0	201	0	0	1430	591	0	157	272	539	1170	6310	1260	941	243
KQFTSSTSYNRGDSTFESKSY	605.779	0.05	60	4.3	8.43	sp|P02671|FIBA_HUMAN		1235.24	0	#DIV/0!	0.0308903	6270	0	2150	0	3600	2510	0	0	0	1310	0	3090	719	0	1350	0	0	0	0	0	0	0	0	0	0	0	0	0
D(+42.01)SGEGDFLAEGGGV	676.284	0.15	60	3.4	3.43	sp|P02671|FIBA_HUMAN	Acetylation (Protein N-term)	1980	0	#DIV/0!	0.0307098	9330	6620	0	0	0	0	3180	0	0	0	0	4930	3900	2480	0	3220	0	0	0	0	0	0	0	0	0	0	0	0
GSLRPPIVI	476.305	0.03	60	9.5	9.75			758.118	0	#DIV/0!	0.0306723	1690	0	0	2910	0	291	0	0	0	1150	2730	0	107	2570	0	1440	0	0	0	0	0	0	0	0	0	0	0	0
YSGGP	480.205	0.05	60	2.7	5.52			0	329.364	0	0.0306512	0	0	0	0	0	0	0	0	0	0	0	0	0	0	0	0	0	0	793	0	0	0	514	0	1940	0	0	376
SQIIALKLLPLLNSVR	593.395	0.25	3.51	5	11			1063.53	2622.73	0.405505	0.0305644	0	0	3430	0	4700	4980	0	0	0	0	0	0	0	1410	0	0	3560	0	2480	1700	2570	3210	2860	3060	6740	2580	1950	1700
KITHRIHWESASLL	564.31	0.03	60	4.5	8.76	sp|P01024|CO3_HUMAN		762.294	0	#DIV/0!	0.0305609	0	3040	2620	0	1180	2640	0	1740	0	0	0	0	589	1150	0	0	0	0	0	0	0	0	0	0	0	0	0	0
SETATVSTT	448.709	0.04	60	10.1	4			0	4227.27	0	0.0305484	0	0	0	0	0	0	0	0	0	0	0	0	0	0	0	0	0	0	0	0	10600	0	0	13900	22000	0	0	0
STSASRTSEAGFCN(+.98)Q(+.98)PPSAWSSHPPT	673.799	0.02	60	7.3	6.46		Deamidation (NQ)	840	0	#DIV/0!	0.0305269	1490	4100	0	0	0	0	0	0	1890	2630	1240	0	0	1630	0	0	1300	0	0	0	0	0	0	0	0	0	0	0
AGGGCSGASPGKAPSM(+15.99)DGLGSSCPAS	556.986	0.03	60	8.2	5.86		Oxidation (M)	0	524.545	0	0.0304254	0	0	0	0	0	0	0	0	0	0	0	0	0	0	0	0	0	0	2680	0	0	0	0	0	1850	0	1240	0
SSSYSKQFTSSTSYN(+.98)RGDSTFESKSYKMA	816.364	0.05	60	9.6	9.3	sp|P02671|FIBA_HUMAN	Deamidation (NQ)	3166.47	0	#DIV/0!	0.0304204	5710	2490	0	12700	0	0	14200	0	0	7800	3850	0	3260	3820	0	0	0	0	0	0	0	0	0	0	0	0	0	0
LPAAGVVL	739.472	0.11	60	4.5	5.52			448.353	0	#DIV/0!	0.0303841	0	1480	0	1530	972	1560	0	0	0	0	1020	0	0	0	1060	0	0	0	0	0	0	0	0	0	0	0	0	0
RVVVTT	674.42	0.01	5.26	11.8	9.75			53.0588	1212.45	0.0437615	0.0303685	0	0	0	0	0	699	0	0	0	0	0	0	0	0	0	0	203	0	5810	0	607	4490	0	2430	0	0	0	0
KIRVPGN	783.469	0.05	5.96	9.7	11			390.882	1286.75	0.303776	0.0303603	1470	1970	458	0	0	0	0	0	2030	0	717	0	0	0	0	0	0	0	679	396	1000	2540	2990	1350	4090	956	126	27.2
GLRGTIIGIKGAN	635.385	0.03	60	5.1	11			1123.53	8077.27	0.139098	0.0302938	0	0	19100	0	0	0	0	0	0	0	0	0	0	0	0	0	0	0	0	5890	22300	0	23300	0	0	0	28700	8660
PILGALIADS	969.574	0.02	60	11.5	3.8			188.353	3135.18	0.0600772	0.0301729	1850	290	197	0	0	0	0	179	0	0	0	686	0	0	0	0	0	1750	609	0	444	6450	1010	1180	4400	644	18000	0
GLDGIPGH	383.196	0.04	60	13.4	5.08			0	1033.64	0	0.0301408	0	0	0	0	0	0	0	0	0	0	0	0	0	0	0	0	0	0	0	4940	0	2230	0	0	0	0	0	4200
RGSPWPPEA	498.743	0.02	60	6.3	6			0	189.091	0	0.0301115	0	0	0	0	0	0	0	0	0	0	0	0	0	0	0	0	0	0	0	0	0	445	956	0	0	0	0	679
Q(-17.03)GVNDN(+.98)EEGFFS	663.761	0.05	60	6.3	3.57	sp|P02675|FIBB_HUMAN	Pyro-glu from Q; Deamidation (NQ)	1581.18	0	#DIV/0!	0.030047	1280	0	1370	1830	0	1140	3180	0	0	0	1380	1090	1180	0	3040	9440	1950	0	0	0	0	0	0	0	0	0	0	0
VNDNEEGFFSARGHRPLD	515.746	0.03	60	3.1	4.75	sp|P02675|FIBB_HUMAN		115.882	5972.73	0.0194019	0.0298308	0	0	0	0	0	0	0	0	0	0	0	0	0	0	0	0	1970	0	0	0	0	0	27500	0	23000	15200	0	0
Q(-17.03)EKPSSPSPMPSSTPSPSLN	679.986	0.01	60	3.1	6		Pyro-glu from Q	1724.12	0	#DIV/0!	0.0298131	0	0	7060	0	3180	5080	0	2360	2560	0	0	0	0	2390	0	0	6680	0	0	0	0	0	0	0	0	0	0	0
EGQVGKLLIRKSGRVQLLLGKVTLDVTMGTA	1094.32	0.08	2.67	6.9	10.28			2168.65	507.636	4.27205	0.029702	0	2760	6090	6120	3060	1550	2090	957	3110	1220	2390	4960	1110	0	0	1450	0	0	0	0	0	0	0	0	5410	174	0	0
LIVAT	516.328	0.05	60	8.2	5.52	sp|P21817|RYR1_HUMAN		382.706	0	#DIV/0!	0.0295556	1060	0	0	1410	0	1040	0	0	0	0	0	756	0	0	1040	1200	0	0	0	0	0	0	0	0	0	0	0	0
QPQVLPN(+.98)LNL	568.819	0.04	60	5.5	5.52		Deamidation (NQ)	0	1623.91	0	0.029474	0	0	0	0	0	0	0	0	0	0	0	0	0	0	0	0	0	0	2440	0	9900	2130	0	0	0	983	2410	0
GEGDFLAEGGGVR	632.301	0.22	7.95	5.9	4.14	sp|P02671|FIBA_HUMAN		527335	45354.5	11.627	0.029341	2440000	201000	30000	1440000	49200	45700	1200000	22000	22800	231000	162000	919000	163000	141000	1270000	366000	262000	20100	46400	40200	49300	150000	31800	29000	47700	21600	31700	31100
APPKPPLPEGEVPPPRPPPPEEKDEEFPEQ	832.414	0.04	60	3.9	4.22	sp|P18206|VINC_HUMAN		6977.65	0	#DIV/0!	0.0293371	0	0	30200	0	28400	0	0	4890	17000	2490	0	5910	4230	11800	0	0	13700	0	0	0	0	0	0	0	0	0	0	0
SLAELGGHLDQQVEEFRR	521.767	0.04	60	2.7	4.83			0	11096.4	0	0.0293171	0	0	0	0	0	0	0	0	0	0	0	0	0	0	0	0	0	33500	0	0	0	0	16700	0	62300	9560	0	0
GQ(+.98)PSVLQVVNLP	626.353	0.01	60	2.7	5.52		Deamidation (NQ)	0	3098.18	0	0.0292205	0	0	0	0	0	0	0	0	0	0	0	0	0	0	0	0	0	7380	0	0	11400	0	15300	0	0	0	0	0
NRGDSTFESKSYKMA	574.267	0.07	60	5.5	8.5	sp|P02671|FIBA_HUMAN		858.059	0	#DIV/0!	0.0292076	3720	441	0	2020	0	0	862	0	0	0	1820	1860	624	3240	0	0	0	0	0	0	0	0	0	0	0	0	0	0
SAVTTVVNPKYEG	682.857	0.01	60	6.3	5.72			0	673.636	0	0.0291755	0	0	0	0	0	0	0	0	0	0	0	0	0	0	0	0	0	1750	0	0	0	0	2240	0	3420	0	0	0
TQ(+.98)WGRILSSYVLKTVLLAVLLRKG	905.881	0.15	60	6	11.1		Deamidation (NQ)	2723.18	0	#DIV/0!	0.0291339	14900	2910	5120	0	0	734	7350	3840	0	1240	0	5110	0	0	1860	3230	0	0	0	0	0	0	0	0	0	0	0	0
KGVLQAGGLPLASV	655.415	0.01	60	3.4	8.75			0	5727.27	0	0.0291168	0	0	0	0	0	0	0	0	0	0	0	0	0	0	0	0	0	0	0	27200	22800	0	0	13000	0	0	0	0
LFEKLG	706.401	0.02	60	2.2	6			0	2044.55	0	0.029008	0	0	0	0	0	0	0	0	0	0	0	0	0	0	0	0	0	4950	0	0	10100	0	0	0	0	0	0	7440
RSQ(+.98)KRKLQLGLQFLPGK	666.735	0.05	60	7.6	12.02		Deamidation (NQ)	1298.53	0	#DIV/0!	0.0289552	991	0	0	2270	0	0	1930	1860	3860	0	0	4110	0	934	0	0	6120	0	0	0	0	0	0	0	0	0	0	0
AETSSG	551.227	0.02	60	3.2	4			0	647.273	0	0.0289374	0	0	0	0	0	0	0	0	0	0	0	0	0	0	0	0	0	0	1470	0	2610	0	0	3040	0	0	0	0
ASGLILAPGPAPLFP	710.928	0.02	5.33	6.2	5.57			832.941	5310.91	0.156836	0.0288728	0	0	0	0	0	0	0	4050	4450	5660	0	0	0	0	0	0	0	0	8720	15600	0	18400	0	0	15700	0	0	0
NRLVMKVVSVT	623.379	0.02	5.04	7.8	11			934.706	12092.7	0.0772949	0.0288106	0	0	0	0	0	0	0	6590	0	0	0	0	0	9300	0	0	0	0	24900	0	4400	0	0	0	51700	0	46800	5220
KGM(+15.99)SHEPKSPSLGM(+15.99)LSTAT	498.494	0.01	60	3	8.6		Oxidation (M)	0	735.455	0	0.0287945	0	0	0	0	0	0	0	0	0	0	0	0	0	0	0	0	0	2440	0	0	3710	0	0	0	0	0	1940	0
REYHTEKLVTSKGDKELR	438.64	0.05	60	3	8.44	sp|P02671|FIBA_HUMAN		0	3107	0	0.0286918	0	0	0	0	0	0	0	0	0	0	0	0	0	0	0	0	0	7970	0	0	0	0	7870	0	17100	652	0	585
LVGGV	444.27	0.03	60	0.5	5.52			0	447.273	0	0.0286764	0	0	0	0	0	0	0	0	0	0	0	0	0	0	0	0	0	1450	0	0	2260	0	0	0	0	0	0	1210
ALTDM(+15.99)PQMRMELERPGGNEITR	641.063	0.02	60	1	4.87	sp|P02671|FIBA_HUMAN	Oxidation (M)	0	2990.91	0	0.0286703	0	0	0	0	0	0	0	0	0	0	0	0	0	0	0	0	0	0	0	0	0	0	7800	0	15000	10100	0	0
TTFGSSTT	401.181	0.04	60	3.8	5.19			0	2440	0	0.028494	0	0	0	0	0	0	0	0	0	0	0	0	0	0	0	0	0	0	10900	10400	5540	0	0	0	0	0	0	0
AGVPRPGVPP	473.787	0.05	60	5.5	9.79			0	639.455	0	0.0284594	0	0	0	0	0	0	0	0	0	0	0	0	0	0	0	0	0	0	1910	0	0	0	0	3580	902	642	0	0
HPRLLSV	821.491	0.01	60	11.3	9.76			106.194	412.464	0.257463	0.0284483	809	0	0	0	0	36.3	0	0	0	0	0	960	0	0	0	0	0	88.5	222	36.6	0	344	1120	741	779	0	917	289
FTKKKPVAG	488.301	0.07	60	5.5	10.3			1293.53	0	#DIV/0!	0.0284367	4270	3230	0	1140	2110	0	0	0	0	0	3150	5680	0	0	2410	0	0	0	0	0	0	0	0	0	0	0	0	0
SSSYSKQFTSSTSYNRGDSTFESKSYKMADEAGSEADHEG	872.574	0.05	5.55	8.9	4.7	sp|P02671|FIBA_HUMAN		1457.29	147.273	9.89521	0.0284144	3620	2780	0	4010	3970	0	5060	0	0	2370	864	0	0	0	2100	0	0	0	0	0	0	1620	0	0	0	0	0	0
EFVSETESRGSESGIFTNTKESSSHHPGIAEFPSRG	776.963	0.03	60	2.7	5.06	sp|P02671|FIBA_HUMAN		3290	0	#DIV/0!	0.0283351	0	0	10000	0	13900	8970	0	7440	9060	0	0	0	0	3290	0	3270	0	0	0	0	0	0	0	0	0	0	0	0
AGFEIFDLN(+.98)SFEQ(+.98)LCIN(+.98)YTNEKLQ	947.087	0.01	60	3.7	4		Deamidation (NQ)	0	457.182	0	0.0282872	0	0	0	0	0	0	0	0	0	0	0	0	0	0	0	0	0	357	2490	0	0	0	0	0	0	0	692	1490
TFVFLAL	405.744	0.04	60	7.3	5.19			0	4545.45	0	0.0282774	0	0	0	0	0	0	0	0	0	0	0	0	0	0	0	0	0	0	0	0	10800	17700	0	21500	0	0	0	0
EGMEEGEFSEAREDM	873.332	0.19	60	7	3.77	sp|P68366|TBA4A_HUMAN		1891.53	0	#DIV/0!	0.0282009	0	0	3410	0	0	3280	0	1600	1670	246	0	5190	1980	2970	1510	0	10300	0	0	0	0	0	0	0	0	0	0	0
AEEEDAIHALFGSM(+15.99)	768.333	0.05	60	6	4		Oxidation (M)	4977.06	0	#DIV/0!	0.0281837	22300	7490	0	18600	0	0	8030	0	0	0	6670	4350	0	3970	13200	0	0	0	0	0	0	0	0	0	0	0	0	0
PRN(+.98)PNCQ	415.191	0.03	60	7	8.68		Deamidation (NQ)	0	700	0	0.0281353	0	0	0	0	0	0	0	0	0	0	0	0	0	0	0	0	0	0	0	0	1850	0	2380	0	0	0	0	3470
VLGKVVGE	800.486	0.15	6.73	7.6	5.97			4808.47	14241.8	0.33763	0.0280815	1110	9770	1690	0	30500	1500	9940	0	0	1320	0	7050	6890	1280	7880	2090	724	10000	26000	3650	33600	9160	6170	6700	42900	1100	15900	1480
S(+42.01)DKPDM(+15.99)AEIEKFDKSKL	680.337	0.18	6.7	4.4	4.86	sp|P62328|TYB4_HUMAN	Acetylation (Protein N-term); Oxidation (M)	23221.2	1699.09	13.6668	0.0280016	0	0	70600	0	86000	43900	0	7820	5060	3180	0	17500	16500	30900	0	28800	84500	0	0	0	0	0	8900	0	7470	2320	0	0
LVN(+.98)AALEGKLVLLDGIHRVNAGTLAVLQRLI	1094.33	0.03	60	12.9	8.75	sp|A3KMH1|VWA8_HUMAN	Deamidation (NQ)	700.118	0	#DIV/0!	0.0277969	0	733	1470	3460	195	0	0	559	1170	619	0	2550	386	760	0	0	0	0	0	0	0	0	0	0	0	0	0	0
RALYLRKTVLGKLAFQVALVLAIHLWMFFILP	936.058	0.01	60	10.2	11.1			104.176	881.455	0.118187	0.0277455	351	0	0	0	0	0	0	0	0	0	0	1420	0	0	0	0	0	0	1890	0	4270	0	371	0	1540	455	1170	0
SQ(+.98)AGQ(+.98)QGLVEPTQFARANQAIQMACQSLGEPGCT	705.126	0.13	60	4.7	4.53		Deamidation (NQ)	7918.82	0	#DIV/0!	0.0277216	15800	0	6200	1020	0	34800	0	0	0	2490	2320	5130	11700	10200	2830	35100	7030	0	0	0	0	0	0	0	0	0	0	0
KLHKVIEPK	546.344	0.07	60	5.9	9.7			2162.94	0	#DIV/0!	0.0276612	6520	6670	0	0	0	7070	0	0	5630	0	0	0	0	0	4760	0	6120	0	0	0	0	0	0	0	0	0	0	0
Q(-17.03)PGDVGPPGP	452.211	0.03	60	9.4	3.8		Pyro-glu from Q	0	4491.82	0	0.0273847	0	0	0	0	0	0	0	0	0	0	0	0	0	0	0	0	0	0	23400	0	3680	0	0	16300	6030	0	0	0
GVPSGFNFT	463.216	0.04	60	10.7	5.52			0	2866.36	0	0.0273115	0	0	0	0	0	0	0	0	0	0	0	0	0	0	0	0	0	0	0	0	9710	0	0	15200	0	0	1900	4720
PPPPPPPPPP	495.277	0.03	60	8.6	5.96			0	433.455	0	0.027301	0	0	0	0	0	0	0	0	0	0	0	0	0	0	0	0	0	595	0	2250	0	343	0	0	0	0	0	1580
Q(-17.03)EKNPLPSKETIEQEKQAGES	785.053	0.21	7.72	5.4	4.65	sp|P62328|TYB4_HUMAN	Pyro-glu from Q	170558	6197	27.5226	0.0271768	7680	0	546000	2030	513000	456000	2370	29800	34600	13400	13200	41700	15300	229000	10400	353000	632000	6710	1910	1930	0	12200	9470	2940	12800	10500	8780	927
TVKSGVWLA	480.784	0.01	60	8.8	8.41			0	1627.32	0	0.0271653	0	0	0	0	0	0	0	0	0	0	0	0	0	0	0	0	0	7110	0	7050	0	4.56	3570	0	166	0	0	0
RAGLPLGG	740.453	0.07	4.01	9.1	9.75			828.353	2295.73	0.360824	0.0271035	0	0	0	2110	4410	1840	3830	0	0	0	0	432	0	0	0	0	1460	1350	6330	499	2590	0	1220	2900	4380	564	2170	3250
TSSTSYNRGDSTFESKSYKMA	587.516	0.02	5.71	5.6	8.1	sp|P02671|FIBA_HUMAN		2201.18	117.273	18.7697	0.0270431	0	0	0	5120	8690	0	0	0	0	3800	3590	5400	1590	7340	1890	0	0	0	0	1290	0	0	0	0	0	0	0	0
FPLLNAIASIF	603.357	0.02	60	11	5.52			10.0588	5070.55	0.00198378	0.0269437	0	0	0	0	0	0	0	0	0	0	0	0	0	0	0	0	171	476	0	0	0	23200	0	0	0	20400	11700	0
FLALQ(+.98)AALPAVPPDTKLSKLDVL	807.824	0.08	5.5	7.7	5.96		Deamidation (NQ)	826.471	5570	0.148379	0.0269269	0	668	0	3750	0	0	266	1840	1810	0	0	756	1780	1870	0	1310	0	7980	0	539	4200	0	15700	25900	0	633	5790	528
IWLSAFAIIVFRV	767.966	0.15	1.6	5.8	9.75			6944.29	17160.6	0.404664	0.0269235	0	0	26700	12300	1390	15400	12400	19600	0	14100	573	8180	1940	0	0	0	5470	297	34300	30000	32600	4210	26000	0	2300	36000	14100	8960
KTAPDVL	372.223	0.04	60	5	5.84			0	897.091	0	0.0269217	0	0	0	0	0	0	0	0	0	0	0	0	0	0	0	0	0	688	0	0	1250	0	3340	4590	0	0	0	0
RALLPLC	785.467	0.02	60	9.2	8.25			131.706	1829.41	0.0719937	0.0269129	0	0	142	499	0	0	0	0	0	147	1190	0	261	0	0	0	0	397	0	97.5	10500	1980	872	877	1970	0	1130	2300
Q(-17.03)VKTTLK	800.484	0.03	60	7.4	10		Pyro-glu from Q	84.8824	1191.38	0.071247	0.026873	0	0	433	0	0	0	0	0	0	0	0	0	0	0	0	1010	0	6170	0	3160	1730	264	1410	0	0	142	79.2	150
G(+42.01)LWLLLPSLSLLLFEVARAGRAVVS	908.217	0.02	60	10.8	9.6		Acetylation (Protein N-term)	638.588	0	#DIV/0!	0.0268629	0	741	0	0	1680	0	1460	1990	0	1160	84	0	169	652	0	2920	0	0	0	0	0	0	0	0	0	0	0	0
GRGASFPPSLGVLVSLQLLLLLGLPPRPQ(+.98)	749.954	0.07	60	3.7	12		Deamidation (NQ)	2793.74	0	#DIV/0!	0.0268553	0	0	9520	9350	0	4000	1590	0	8350	0	0	0	924	9850	79.5	0	3830	0	0	0	0	0	0	0	0	0	0	0
QPNQ(+.98)N(+.98)LWAQ(+.98)GCHE	764.309	0.12	60	9.3	5.24		Deamidation (NQ)	2714.12	0	#DIV/0!	0.0267516	1310	0	9900	4230	0	0	0	0	0	3310	0	6470	12100	3550	0	5270	0	0	0	0	0	0	0	0	0	0	0	0
Q(+.98)RPVVKT	828.48	0.01	60	10	11		Deamidation (NQ)	0	114.982	0	0.0266573	0	0	0	0	0	0	0	0	0	0	0	0	0	0	0	0	0	80.7	646	0	321	0	0	0	182	0	35.1	0
HVQPQPQPKPQVQLHVQ	497.776	0.14	60	1.8	8.76	sp|Q15942|ZYX_HUMAN		1915.29	0	#DIV/0!	0.0265548	0	1050	0	0	0	0	0	0	1460	3760	2080	9960	0	2940	2340	3410	5560	0	0	0	0	0	0	0	0	0	0	0
S(+42.01)QKQEEENPAEETGEEKQDTQEKEGILPERAEEAKL	834.596	0.02	60	9	4.24		Acetylation (Protein N-term)	1533.53	0	#DIV/0!	0.0265111	0	0	0	0	0	0	0	4520	6270	2430	2350	3400	0	1840	0	5260	0	0	0	0	0	0	0	0	0	0	0	0
N(+.98)KAFRTN(+.98)FRLWSHFQ(+.98)S	681.343	0.01	60	8.7	12.01		Deamidation (NQ)	0	1071.82	0	0.0265097	0	0	0	0	0	0	0	0	0	0	0	0	0	0	0	0	0	0	0	0	0	0	1870	2800	0	0	6010	1110
SGCQS	481.169	0.02	60	2.8	5.24			0	1401.82	0	0.0264767	0	0	0	0	0	0	0	0	0	0	0	0	0	0	0	0	0	0	3670	0	5260	0	0	0	6490	0	0	0
VTEPISAESGEQVERVNEPSILEM(+15.99)SR	968.146	0.07	60	5.9	4.21		Oxidation (M)	0	2054.55	0	0.0263278	0	0	0	0	0	0	0	0	0	0	0	0	0	0	0	0	0	6670	0	0	0	0	9860	0	0	6070	0	0
VAPEEHPVLLTEAPLNPK	652.026	0.08	60	2.8	4.75			13165.9	0	#DIV/0!	0.0261989	0	0	36900	0	34500	32100	0	4190	7430	0	0	7070	5430	0	0	48500	47700	0	0	0	0	0	0	0	0	0	0	0
LVLVIGTGISAAVAPQVPALKSWKGLIQ(+.98)ALL	1043.3	0.15	2.87	5	10		Deamidation (NQ)	3792.35	1054.55	3.5962	0.0261599	1810	3110	5720	1340	3780	7790	1500	4240	2220	1250	0	3680	4430	10100	6740	4720	2040	0	0	0	11600	0	0	0	0	0	0	0
GLPSLAPLVPPP	579.364	0.01	60	8	5.52			0	2272.73	0	0.0261278	0	0	0	0	0	0	0	0	0	0	0	0	0	0	0	0	0	0	12200	0	7040	0	4110	0	0	0	1650	0
HSEENEEEEEECAN(+.98)ATDVTTTPSVQ(+.98)YINGKHLVT	761.939	0.02	60	4.7	4.14		Deamidation (NQ)	1134.71	0	#DIV/0!	0.0261268	0	1750	1960	980	3810	4120	0	2850	0	0	0	0	0	3820	0	0	0	0	0	0	0	0	0	0	0	0	0	0
KHSAQLLLGCELRDLVT	474.747	0.02	60	5.9	6.74			0	3719.09	0	0.0260366	0	0	0	0	0	0	0	0	0	0	0	0	0	0	0	0	0	0	0	4750	0	3300	0	5090	0	0	5570	22200
PGKKGTRGKKGPPGSIVKKGLPGLKGLPGNPGLV	823.245	0.02	60	9.1	11.47			270.235	1707.09	0.158302	0.0259282	1510	0	1800	0	970	0	0	0	0	0	0	0	0	0	314	0	0	5620	1570	0	600	675	0	6860	483	0	2970	0
ENRGGDPHSEAPFAKSDN(+.98)QPSTEKAME	977.436	0.64	60	6.1	4.64	sp|Q8WXH0|SYNE2_HUMAN	Deamidation (NQ)	139050	0	#DIV/0!	0.0259271	351000	59600	4350	618000	0	0	499000	0	0	30100	23000	305000	27700	59300	254000	50000	82800	0	0	0	0	0	0	0	0	0	0	0
VNDN(+.98)EEGFFSARGHRPLDKK	580.039	0.04	60	2.9	6.73	sp|P02675|FIBB_HUMAN	Deamidation (NQ)	0	1914.55	0	0.0258445	0	0	0	0	0	0	0	0	0	0	0	0	0	0	0	0	0	5050	0	0	0	0	7470	0	8540	0	0	0
DDPDAPLQPVTPLQLFEGR	703.358	0.09	2.42	9	3.84			2608.24	723.455	3.60525	0.0255979	4230	1520	2930	1720	3920	6610	1040	4140	1130	0	1560	2540	2770	0	1050	7020	2160	0	0	0	0	0	609	0	7000	349	0	0
SQ(+.98)KEHLPVTQ(+.98)IVM(+15.99)TDAGRPHSEAAY	557.468	0.06	60	1.9	5.96		Deamidation (NQ); Oxidation (M)	0	1775.45	0	0.0255645	0	0	0	0	0	0	0	0	0	0	0	0	0	0	0	0	0	5670	0	0	0	0	5510	0	8350	0	0	0
AWTSLALTLLVFALTLA	902.537	0.04	5.44	6.1	5.57			2686.94	86.3636	31.112	0.0253644	0	2010	0	8600	0	8200	0	0	0	4100	0	0	618	8600	0	5680	7870	0	0	0	0	0	0	0	0	950	0	0
FIQ(+.98)TLLQ(+.98)VVGVVSVAVAVIPWIAIPLVPLG	779.223	0.02	3.66	8.3	5.52		Deamidation (NQ)	580.588	2916.09	0.199098	0.025328	0	0	0	0	0	0	1480	0	0	0	2620	5770	0	0	0	0	0	5590	2820	0	0	0	7770	0	0	9730	647	5520
RLSQPPLV	909.563	0.01	60	8.4	9.75			42	601.818	0.0697885	0.0252851	0	0	0	0	0	714	0	0	0	0	0	0	0	0	0	0	0	3200	455	0	674	197	0	0	924	0	1170	0
GRIYIQAHIDRDVLIVLVRDAKN(+.98)L	931.23	0.02	5.26	13.8	8.59		Deamidation (NQ)	32.3529	1425.64	0.0226937	0.0252666	506	0	0	0	0	0	0	0	0	0	0	0	0	0	44	0	0	2900	762	0	0	0	5420	0	6600	0	0	0
Q(-17.03)EILESEEKGDPNKPSGFRSV	777.048	0.06	60	11.2	4.59	sp|O00151|PDLI1_HUMAN	Pyro-glu from Q	3840.65	0	#DIV/0!	0.0252446	0	0	6710	0	11300	0	0	721	3500	3520	2370	14700	0	7170	0	0	15300	0	0	0	0	0	0	0	0	0	0	0
TSGTGT	523.252	0.02	60	8.9	5.19			0	5086.64	0	0.0251168	0	0	0	0	0	0	0	0	0	0	0	0	0	0	0	0	0	543	0	7080	1360	0	1500	6030	9440	0	30000	0
GHSNQCQDGSGICVN(+.98)CQ(+.98)HNTAGEH	625.242	0.09	60	4.1	5.72		Deamidation (NQ)	605.471	0	#DIV/0!	0.0251146	0	0	1960	0	0	2480	0	0	0	1080	755	0	918	0	0	1300	1800	0	0	0	0	0	0	0	0	0	0	0
IGVVAGIMTVILIILIVVMARYCRSKNK	769.231	0.01	5.36	11.1	10.31			11.0588	1271.73	0.00869591	0.0250576	0	0	0	0	0	0	0	0	0	0	0	0	0	0	188	0	0	0	1120	0	0	0	2350	1410	7510	0	549	1050
AALKKADVIVLAG	634.896	0.08	6.05	9	8.64			1329.47	10111.4	0.131483	0.0250262	0	0	2350	0	0	5750	0	2400	0	981	0	0	2160	0	0	4040	4920	0	14100	52700	14500	407	298	3640	4670	3290	13500	4120
PGRAGPM(+15.99)GEPGRPGQGGLEGP	663.997	0.01	60	2.3	6.57		Oxidation (M)	0	636.364	0	0.0250198	0	0	0	0	0	0	0	0	0	0	0	0	0	0	0	0	0	0	0	0	2350	0	0	1800	2850	0	0	0
RAFLS	593.347	0.06	60	4.7	9.75			760.059	0	#DIV/0!	0.0249348	0	0	3080	1420	0	2660	0	1970	0	1260	1640	0	891	0	0	0	0	0	0	0	0	0	0	0	0	0	0	0
ELLESYIDGR	597.802	0.07	60	3.8	4.14			2574.71	0	#DIV/0!	0.0248206	4580	2930	8640	0	0	0	0	10100	0	1830	2690	3830	0	0	9170	0	0	0	0	0	0	0	0	0	0	0	0	0
GIADSLE	704.333	0.01	60	9.6	3.67			0	474.545	0	0.0248125	0	0	0	0	0	0	0	0	0	0	0	0	0	0	0	0	0	0	0	1340	0	0	1790	0	2090	0	0	0
WKQAAQMH	500.251	0.01	60	6.8	8.76			0	308.727	0	0.0247361	0	0	0	0	0	0	0	0	0	0	0	0	0	0	0	0	0	0	0	1370	0	886	0	0	0	0	1140	0
LGGFAGLFDLKAAG	446.235	0.05	60	4	5.84			0	7209.09	0	0.0246131	0	0	0	0	0	0	0	0	0	0	0	0	0	0	0	0	0	0	0	23000	0	23500	0	0	32800	0	0	0
E(-18.01)NAPAQ(+.98)SIGIRRQ	711.887	0.05	60	3.5	9.7		Pyro-glu from E; Deamidation (NQ)	0	1531.73	0	0.0245153	0	0	0	0	0	0	0	0	0	0	0	0	0	0	0	0	0	671	0	0	0	0	8390	0	3260	598	0	3930
AAFSP	492.253	0.04	60	9.5	5.57			0	573.818	0	0.0244938	0	0	0	0	0	0	0	0	0	0	0	0	0	0	0	0	0	0	0	796	2220	2800	0	0	0	0	0	496
AAPGQEPPEHM(+15.99)AELQ	810.878	0.02	60	13.8	4.24		Oxidation (M)	0	1358.09	0	0.0244916	0	0	0	0	0	0	0	0	0	0	0	0	0	0	0	0	0	2670	0	0	0	0	4750	0	6800	0	0	719
NIVLEVLAR	513.82	0.04	60	5.4	6			0	2130.91	0	0.0244644	0	0	0	0	0	0	0	0	0	0	0	0	0	0	0	0	0	0	9580	5150	0	0	8350	0	0	0	360	0
A(+42.01)EGKAGGAAGLFAKQVQKKF	512.785	0.02	60	11.3	10		Acetylation (Protein N-term)	3740.59	0	#DIV/0!	0.0244467	7540	0	0	0	0	0	0	0	3630	6400	0	17400	5370	3080	8070	0	12100	0	0	0	0	0	0	0	0	0	0	0
RVPPT	569.335	0.01	60	7.6	9.75			412.941	6140.91	0.0672443	0.0244141	0	0	7020	0	0	0	0	0	0	0	0	0	0	0	0	0	0	7650	0	28100	0	0	13400	0	0	0	18400	0
SSSYSKQFTSSTSYNRGDSTF	779.676	0.05	5.82	9.7	8.22	sp|P02671|FIBA_HUMAN		3814.71	500.909	7.61557	0.0244006	4140	1800	0	0	1680	1600	0	0	2020	3980	3520	13900	9770	9990	1550	10900	0	0	3500	2010	0	0	0	0	0	0	0	0
A(+42.01)SSDIQVKELEKR	515.613	0.03	60	1.8	6.23		Acetylation (Protein N-term)	0	396.364	0	0.0244	0	0	0	0	0	0	0	0	0	0	0	0	0	0	0	0	0	1770	0	0	0	1200	0	0	1390	0	0	0
SSTSYNRGDSTFESKSYKMADEAGSEADHEGTHST	754.719	0.13	60	5.5	4.69	sp|P02671|FIBA_HUMAN		2700	0	#DIV/0!	0.0243923	0	1400	6130	0	5450	13300	0	5660	3380	0	0	0	0	5250	0	5330	0	0	0	0	0	0	0	0	0	0	0	0
LSKHIKT	826.524	0.01	60	8	10			0	148.436	0	0.0243525	0	0	0	0	0	0	0	0	0	0	0	0	0	0	0	0	0	0	415	0	0	362	0	0	0	0	79.8	776
TYAPVISAEKAYHEQL	607.311	0.05	60	7	5.37	sp|P68366|TBA4A_HUMAN		2348.24	0	#DIV/0!	0.0242506	5760	3350	0	0	0	0	0	0	0	3390	4180	0	2550	11100	2350	0	7240	0	0	0	0	0	0	0	0	0	0	0
HIQSARALMVVAVLLGFVAMV	742.444	0.01	60	9.1	9.76			114.118	2849	0.0400553	0.0242464	0	0	0	0	0	0	0	0	0	0	0	0	0	1940	0	0	0	0	0	0	1820	13300	11000	1440	0	839	2940	0
GSPPWAV	357.191	0.11	60	4.9	5.52			1176.47	4261.82	0.276049	0.0242212	0	0	960	0	4540	3620	0	0	0	0	1170	0	0	0	0	5840	3870	2660	3460	0	4390	4070	17800	0	4530	2470	4200	3300
KDRVLKLLNKN(+.98)GTVKKVSKLKRKEK	738.717	0.43	60	4.7	10.84		Deamidation (NQ)	32820	0	#DIV/0!	0.0241175	184000	91600	10000	5250	0	7190	41300	56400	19600	30000	13100	22100	8300	24100	21800	0	23200	0	0	0	0	0	0	0	0	0	0	0
Q(-17.03)IFLPEPEQPS	634.311	0.3	10.76	4.7	3.79		Pyro-glu from Q	717.529	103.636	6.92353	0.024083	0	0	1460	0	1670	2220	0	0	610	617	0	1580	336	595	0	1020	2090	0	0	0	0	1140	0	0	0	0	0	0
Q(-17.03)EILESEEKGDPNKPSGF	993.963	0.09	60	3.9	4.25	sp|O00151|PDLI1_HUMAN	Pyro-glu from Q	4086.47	0	#DIV/0!	0.0239919	0	0	12600	0	6650	16800	0	13700	6960	0	0	0	1530	0	0	6530	4700	0	0	0	0	0	0	0	0	0	0	0
LRQLALLLWKNYTLQ(+.98)KRKVLVT	675.423	0.01	60	9.3	11.17		Deamidation (NQ)	0	575.636	0	0.0238367	0	0	0	0	0	0	0	0	0	0	0	0	0	0	0	0	0	0	0	576	1940	0	0	0	0	0	846	2970
Q(-17.03)GVN(+.98)DNEEGFF	620.246	0.22	60	7.5	3.57	sp|P02675|FIBB_HUMAN	Pyro-glu from Q; Deamidation (NQ)	5439.41	0	#DIV/0!	0.0238351	2420	0	4960	0	27100	7940	1280	4000	7530	6230	0	0	0	11900	1510	0	17600	0	0	0	0	0	0	0	0	0	0	0
HIN(+.98)LKLTT	940.568	0.25	4.92	6.3	8.76		Deamidation (NQ)	3155.69	8934.27	0.353212	0.0237976	7080	614	6920	3470	4010	769	2320	1470	9100	805	98.7	2050	5910	1500	1720	3220	2590	121	5190	0	18300	30400	5970	746	17000	7570	3260	9720
DFGPC	538.208	0.03	60	9.8	3.8			0	202	0	0.0237178	0	0	0	0	0	0	0	0	0	0	0	0	0	0	0	0	0	860	0	0	0	613	0	0	749	0	0	0
TDN(+.98)VKALLLN(+.98)RDGTQCLSGSSDGT	494.24	0.03	60	4.8	4.43		Deamidation (NQ)	0	1386.36	0	0.0236721	0	0	0	0	0	0	0	0	0	0	0	0	0	0	0	0	0	4410	0	0	0	0	4820	0	0	6020	0	0
TKDLADAPAEEL	636.824	0.05	5.92	6.5	3.92			1461.18	12812.7	0.114041	0.023614	0	0	3730	0	0	20000	0	1110	0	0	0	0	0	0	0	0	0	50600	0	8080	0	44200	9720	0	0	0	24700	3640
PDMHADMHADMPMGPGMN(+.98)PGPPM(+15.99)GPGGPP	971.725	0.17	60	7.6	4.4		Deamidation (NQ); Oxidation (M)	1627.65	0	#DIV/0!	0.0236065	0	0	0	0	6940	0	1600	0	0	1160	1950	3160	2760	0	0	4810	5290	0	0	0	0	0	0	0	0	0	0	0
IKKAS	546.367	0.07	4.91	6.5	10			306.941	1088.73	0.281927	0.0235596	0	0	292	0	3690	0	0	489	0	0	0	0	0	0	0	0	747	0	1670	1680	1710	1840	1610	1600	1010	0	535	321
ADGFPTVSVMLPLHSEQ(+.98)	914.932	0.07	60	2.1	4.35		Deamidation (NQ)	0	2408.18	0	0.0231816	0	0	0	0	0	0	0	0	0	0	0	0	0	0	0	0	0	7590	0	0	0	0	9980	0	0	8920	0	0
NGFKSHALQLNNRQI	435.738	0.29	5.3	2.6	11			17691.8	44845.5	0.394505	0.023147	28600	4820	0	33800	33600	14700	4250	1780	0	8170	5150	8150	7380	9650	9710	131000	0	34400	28900	30300	53600	31900	22500	72600	77800	16300	92300	32700
SPARSAMCL	468.217	0.08	60	8.4	7.96			351.765	4327.27	0.0812902	0.0231209	0	0	0	0	5520	0	0	0	0	460	0	0	0	0	0	0	0	0	1250	4600	21300	3260	0	11200	5990	0	0	0
KRKEKRRKKKE	757.499	0.07	60	7.6	11.17			0	1919	0	0.023106	0	0	0	0	0	0	0	0	0	0	0	0	0	0	0	0	0	899	0	0	0	0	0	0	0	6720	9320	4170
EGDFLAEGGGVR	603.79	0.2	8.43	5.2	4.14	sp|P02671|FIBA_HUMAN		3258340	33454.5	97.396	0.0230775	14200000	2260000	5080	10700000	41600	65400	7670000	69100	88600	1590000	1370000	6560000	854000	684000	7770000	724000	740000	20400	0	43100	55600	95900	43000	48200	0	19700	25500	16600
SLDRNLPSDSQDLGQHGLEEDF	824.713	0.22	60	3.9	3.96			3250.59	0	#DIV/0!	0.0230038	8840	13200	3160	0	0	0	0	12300	5300	0	3790	0	0	4020	4650	0	0	0	0	0	0	0	0	0	0	0	0	0
AGTPGPSSGGHASQ(+.98)SG	678.284	0.01	60	6.2	6.79		Deamidation (NQ)	0	1365.45	0	0.0229409	0	0	0	0	0	0	0	0	0	0	0	0	0	0	0	0	0	0	3510	0	0	0	0	7380	2610	0	0	1520
E(-18.01)LLLPN	680.406	0.06	60	7.1	4		Pyro-glu from E	1699.06	21512.3	0.0789809	0.0228939	0	0	0	6450	0	0	0	0	5240	0	884	1500	3090	4420	0	0	7300	4540	14000	9920	9690	122000	12000	4310	21400	16500	21300	975
ALASVLSGP	407.745	0.06	60	9.6	5.57			0	2512.73	0	0.0228855	0	0	0	0	0	0	0	0	0	0	0	0	0	0	0	0	0	0	0	3490	0	3080	0	5010	14400	0	1660	0
QKPRNIKGKQ	1196.72	0.03	60	7.4	11.26			856.235	0	#DIV/0!	0.022679	340	0	1190	2570	0	0	148	0	1070	1800	1060	4280	417	0	0	301	1380	0	0	0	0	0	0	0	0	0	0	0
KAKKAT	646.433	0.1	60	6.8	10.3			5051.47	0	#DIV/0!	0.0226789	0	0	4300	885	5160	1700	0	10800	24300	0	10200	1070	1110	9480	1570	0	15300	0	0	0	0	0	0	0	0	0	0	0
HLSQDTGSPSGMRPWEDLPSQDTGSPS	957.093	0.14	60	2.9	4.22			2599.06	0	#DIV/0!	0.022635	3580	4710	0	0	0	0	1380	3480	12000	1420	1960	0	584	6590	0	8480	0	0	0	0	0	0	0	0	0	0	0	0
Q(-17.03)VFTNIHGR	527.773	0.04	60	7.4	9.76		Pyro-glu from Q	0	790	0	0.0226276	0	0	0	0	0	0	0	0	0	0	0	0	0	0	0	0	0	820	0	0	2010	4240	0	0	0	0	0	1620
VPPIPSV	708.42	0.01	60	8.4	5.49			79.1176	3010	0.0262849	0.0225199	0	0	0	0	0	0	0	0	0	0	0	305	0	0	0	0	1040	0	0	0	0	1500	13400	0	10600	0	0	7610
GFLILGGLLLN	565.361	0.1	60	4.4	5.52			1069.65	0	#DIV/0!	0.0224679	964	1420	0	5020	0	2740	297	0	211	568	0	3360	0	254	1910	1440	0	0	0	0	0	0	0	0	0	0	0	0
DGTWSGSSPHCIEPTQTSCENPGVPRHGSQNN(+.98)TFG	737.901	0.01	60	5.4	5.27		Deamidation (NQ)	266.471	2224.55	0.119787	0.0224594	0	1370	0	3160	0	0	0	0	0	0	0	0	0	0	0	0	0	3870	0	0	0	0	9430	0	4330	5740	0	1100
Q(-17.03)FTSSTSYNRGDSTFESKS	1056.46	0.07	60	4.9	6.07	sp|P02671|FIBA_HUMAN	Pyro-glu from Q	3485.29	0	#DIV/0!	0.0223405	3930	0	9280	0	19000	4180	0	3050	3180	0	0	0	1590	4280	1800	4820	4140	0	0	0	0	0	0	0	0	0	0	0
KVMLK	618.401	0.09	60	6.5	10			2674.12	0	#DIV/0!	0.0223017	0	0	0	9060	5090	7840	0	0	0	2570	3220	2770	0	3810	0	0	11100	0	0	0	0	0	0	0	0	0	0	0
ILPKCIGG	400.748	0.04	60	8.2	8.22			0	1286.36	0	0.0222611	0	0	0	0	0	0	0	0	0	0	0	0	0	0	0	0	0	4830	4480	0	0	0	0	4840	0	0	0	0
SETESRGSESGIFTNTKESSSHHPGIAEFPSRGK	727.548	0.09	60	2.8	6.01	sp|P02671|FIBA_HUMAN		3153.53	0	#DIV/0!	0.0220711	3510	0	6000	2380	0	6900	0	3060	1850	1350	0	0	3820	15800	0	8940	0	0	0	0	0	0	0	0	0	0	0	0
YNRGDSTFESKSYKMADEAGSEADHEGTHSTKRGHA	792.154	0.03	60	3	5.81	sp|P02671|FIBA_HUMAN		4267.65	0	#DIV/0!	0.0220466	6130	2410	8830	0	12900	20900	0	5290	6000	1560	0	0	1480	7050	0	0	0	0	0	0	0	0	0	0	0	0	0	0
ASEGGFTATGQRQLRPEHFQEVGYAAPPSPPLS	871.427	0.06	60	10.1	5.5			1728.24	0	#DIV/0!	0.0219668	7970	1820	0	2990	0	0	2490	4460	2680	1940	0	5030	0	0	0	0	0	0	0	0	0	0	0	0	0	0	0	0
AGVEMAGQAPSQEDRAQVVS	677.323	0.05	5.65	8.1	4.14			1728.18	140.909	12.2645	0.0218418	0	0	2790	0	3780	6120	0	0	0	837	0	2920	0	3150	802	3380	5600	0	0	0	0	0	0	1550	0	0	0	0
PFLRSSKIIQISSGRELRV	1093.67	0.08	5.75	8.3	11.71			552.371	2595.09	0.212852	0.0217754	1030	1210	0	0	780	0	3760	0	57.3	0	358	535	0	0	0	0	1660	1710	4980	0	0	1240	0	9640	3570	696	0	6710
RLASKTKTSSLAPVVGTTTTTPSPSAIKAAAKSAALQVTKQ(+.98)I	837.303	0.02	60	9.1	11.39		Deamidation (NQ)	256.529	1396.36	0.183712	0.0217598	0	0	0	344	0	0	2150	0	1240	490	0	0	0	137	0	0	0	3600	0	0	1830	0	1850	0	4910	0	3170	0
SETESRGSESGIFTNTKESSSHHPGIAEFPS	823.879	0.02	60	3.2	4.97	sp|P02671|FIBA_HUMAN		2138.82	0	#DIV/0!	0.0217345	0	0	5110	0	2930	8810	0	6960	2770	0	0	0	1020	5640	0	3120	0	0	0	0	0	0	0	0	0	0	0	0
LAQRLQ(+.98)RLTVLAVNRIIY	1071.15	0.1	5.37	6.6	11.71	sp|Q99698|LYST_HUMAN	Deamidation (NQ)	5127.24	1163.55	4.40656	0.0216992	0	11700	0	2960	16900	2800	10800	9360	5230	4950	2830	1910	9450	0	303	1210	6760	0	0	0	0	889	7370	0	0	4540	0	0
VPPGKK	625.397	0.11	2.79	8	10			233.059	770.273	0.302567	0.0216552	0	0	0	1330	0	0	0	0	0	35	0	0	0	477	0	2120	0	249	1300	1790	435	868	1230	339	536	706	1020	0
FLKKSVVA	446.293	0.03	60	5.6	10			225.706	0	#DIV/0!	0.0215602	0	247	503	0	0	504	0	904	443	0	609	0	0	0	627	0	0	0	0	0	0	0	0	0	0	0	0	0
GISFGVACFQLIGIFL	562.307	0.18	60	3.9	5.52			7340.59	21909.1	0.335048	0.0213371	0	0	0	0	0	29200	9790	33800	0	13100	24700	0	0	14200	0	0	0	0	39700	41300	17100	17900	20300	14800	63600	0	0	26300
RGSTGLGAGGAGPGGPAGV	748.394	0.06	3.61	9.6	9.75			5042.94	14810.9	0.340488	0.0212734	0	0	0	0	38600	0	0	11000	5350	5460	0	17900	0	7420	0	0	0	31100	0	20500	22800	13400	29200	0	5430	8790	13700	18000
YFVVIIYALVFL	730.451	0.06	3.83	10.4	5.52			169.765	1300.82	0.130506	0.0212225	962	0	213	0	0	0	0	0	1200	0	0	0	122	0	0	0	389	643	167	0	640	304	593	6630	2000	662	1660	1010
RSPGAPGPLTLKEVEELE	641.345	0.03	60	3.1	4.49	sp|Q15942|ZYX_HUMAN		4341.76	0	#DIV/0!	0.0211455	3390	6670	0	6020	0	0	0	0	0	5030	19100	13100	0	0	10200	0	10300	0	0	0	0	0	0	0	0	0	0	0
GLRGLAVSGL	942.569	0.24	3.91	6.2	9.75			6616.06	2296.36	2.8811	0.0209848	9230	9870	20300	3560	15300	533	1360	8660	11000	4630	2030	2850	8210	4940	1860	5170	2970	5260	7810	0	1190	1800	735	6160	534	1590	181	0
PRKPYTIKK	1130.69	0.18	1.97	7.2	10.47			1294.47	452.273	2.86215	0.0209536	1360	2660	267	1580	1500	2890	2130	342	573	401	972	620	541	1020	0	2010	3140	0	375	0	0	0	0	0	1250	1610	1740	0
VPPNNSNAAEDDLPTVELQGVVPR	844.431	0.01	60	9.9	3.92			3704.12	0	#DIV/0!	0.0209406	10400	0	17100	4670	9090	0	0	6020	6800	0	0	0	0	0	4950	3940	0	0	0	0	0	0	0	0	0	0	0	0
KGVCVDWRTPAFCPIYCGFYN(+.98)THTQDGHGE	1134.82	0.1	60	4.9	6		Deamidation (NQ)	131.176	2808.18	0.0467122	0.0204114	0	0	0	0	0	0	0	0	0	0	0	2230	0	0	0	0	0	0	2560	0	0	2000	3690	0	9640	13000	0	0
VNDNEEGFFSARGHRPLDK	438.416	0.08	60	0.9	5.48	sp|P02675|FIBB_HUMAN		0	10940	0	0.0203951	0	0	0	0	0	0	0	0	0	0	0	0	0	0	0	0	0	18000	0	0	1470	2010	31200	1930	58100	6160	0	1470
CRLGAESPSIA	552.273	0.05	60	8.1	5.99			577.647	4597.27	0.12565	0.020377	0	0	0	0	0	0	0	0	0	0	0	0	0	0	0	9820	0	15300	4020	0	8960	0	0	7790	0	0	0	14500
RSAAVLALLLCAGQVT	793.495	0.01	60	9.8	8.25			115.294	580.745	0.198528	0.0203526	1820	0	0	0	0	0	0	0	0	0	0	0	0	0	0	140	0	957	385	0	1410	1320	0	1170	552	0	51.2	543
TFPLALVLS	960.593	0.04	5.43	8.4	5.19			39.3447	331.427	0.118713	0.0201437	0	0	6.46	186	0	0	0	114	0	0	0	283	0	0	0	79.4	0	1530	800	0	312	0	38.2	609	49	248	59.5	0
RTFLKKKGGK	581.876	0.09	60	3.2	11.33			634.529	0	#DIV/0!	0.0201345	0	1850	0	0	0	0	1190	0	2350	967	1480	0	1930	0	1020	0	0	0	0	0	0	0	0	0	0	0	0	0
NPTGGADEWQM(+15.99)	611.236	0.11	60	7	3.67		Oxidation (M)	1684.88	0	#DIV/0!	0.0198829	2140	0	988	0	2210	477	0	0	2430	368	0	1230	2610	2080	3080	9300	1730	0	0	0	0	0	0	0	0	0	0	0
QPPRISKAQK	1152.68	0.01	60	5.5	11.17			359.035	0	#DIV/0!	0.0198678	0	0	761	527	1630	914	0	403	62.6	0	0	793	0	0	797	0	216	0	0	0	0	0	0	0	0	0	0	0
ADSGEGDFLAEGGGVRGPRVVER	583.292	0.04	60	2.6	4.51	sp|P02671|FIBA_HUMAN		0	4628.18	0	0.0198522	0	0	0	0	0	0	0	0	0	0	0	0	0	0	0	0	0	8400	0	0	0	0	10800	0	24500	7210	0	0
LRRKLDLFANVVHVK	904.559	0.07	5.86	7.9	11			380.547	3057.91	0.124447	0.019836	0	503	32.3	0	0	446	0	242	0	830	0	0	0	156	0	0	4260	977	2930	0	8910	0	1120	2750	3650	0	13300	0
E(-18.01)ALQLLFLILPPPNRN(+.98)LLKLLLDLLY	1010.28	0.13	2.76	7.7	6.17		Pyro-glu from E; Deamidation (NQ)	3548.45	836.273	4.24317	0.0198321	2230	7580	0	1900	972	954	2320	4820	54.6	8350	6670	723	5560	1190	3690	12000	1310	0	2290	0	0	0	0	3000	0	3410	499	0
KIFKIPPQAFKDLKKLQVIDLSN(+.98)NALITI	828.245	0.01	60	8.6	9.83		Deamidation (NQ)	208.647	1007.27	0.207141	0.0196289	1110	0	0	0	0	0	1730	0	0	0	707	0	0	0	0	0	0	1300	0	0	371	3070	490	2990	0	0	899	1960
TILPKKK	414.286	0.14	60	7.5	10.3			1235.88	0	#DIV/0!	0.0195682	0	0	4810	0	2790	3440	0	0	0	0	0	2220	0	1820	0	3300	2630	0	0	0	0	0	0	0	0	0	0	0
IGEPAN(+.98)VTAIVSLY	483.259	0.18	60	7.3	4		Deamidation (NQ)	7005.88	21463.6	0.326407	0.0193879	0	0	28100	0	33200	22300	0	21400	0	0	0	14100	0	0	0	0	0	0	0	49900	42600	35100	14700	30900	0	0	34000	28900
HLVLTVT	782.478	0.04	5.69	7.7	6.74			216.647	1576.09	0.137458	0.0193682	451	0	0	1380	0	0	0	0	0	375	0	862	171	0	444	0	0	1610	0	0	0	3300	4840	700	312	0	6240	335
DEAGSEADHEGTHSTKRGHAKSRPV	532.656	0.46	4.65	3	6.28	sp|P02671|FIBA_HUMAN		11874.7	4959.64	2.39427	0.0190995	23800	3220	19100	8210	24000	21400	3590	2740	5340	3380	3290	14200	11000	8000	14400	22800	13400	11700	468	499	385	1130	13200	644	14200	7900	1110	3320
KLRRELVAS	536.332	0.05	60	9.9	10.84			614.706	0	#DIV/0!	0.0190005	1100	0	2050	0	0	1830	0	0	0	0	0	1820	1660	0	770	1220	0	0	0	0	0	0	0	0	0	0	0	0
DGTKVNCTCGATAVAVPSNIQG	1053.51	0.11	60	7.7	5.82			220.588	1274.55	0.173072	0.0189755	0	0	0	0	3750	0	0	0	0	0	0	0	0	0	0	0	0	0	1680	2190	1660	1040	0	4390	0	0	1670	1390
LVEGEIAEEAAEKATS	823.905	0.04	60	3.4	3.98			1760.59	0	#DIV/0!	0.0189687	0	0	3270	0	0	0	0	3680	5890	2530	1460	4650	1590	0	0	0	6860	0	0	0	0	0	0	0	0	0	0	0
N(+.98)GQ(+.98)SGHSAAGPGFTSRTE	588.262	0.13	4.26	3.7	6.75		Deamidation (NQ)	2945.47	383.273	7.68505	0.0189369	4730	0	2950	953	9000	10900	1290	2640	1570	2550	0	0	2580	7580	0	3330	0	0	0	0	0	0	806	0	1820	1590	0	0
MGSSGPLE	389.183	0.03	60	5.3	4			0	6817.27	0	0.0189084	0	0	0	0	0	0	0	0	0	0	0	0	0	0	0	0	0	0	22600	25400	25300	0	0	0	0	0	0	1690
RAWLARRRFQSIRRFVLN(+.98)IQLTYRVQRLQKK	1001.1	0.01	60	10.5	12.48		Deamidation (NQ)	260.353	1720	0.151368	0.0188861	0	0	0	0	0	0	3880	0	0	0	546	0	0	0	0	0	0	1750	3870	0	0	0	2200	0	6040	920	4140	0
DGRPPEESAHEMMEEEEEIPKPK	674.309	0.01	60	9.9	4.33			1221.76	0	#DIV/0!	0.0186404	0	0	1460	1680	0	2010	0	1870	2440	5660	0	0	3030	2620	0	0	0	0	0	0	0	0	0	0	0	0	0	0
HTLYN(+.98)ICRNMHAWLRQ(+.98)DHKNVC	689.31	0.04	60	1.8	8.91		Deamidation (NQ)	0	3188.18	0	0.0185891	0	0	0	0	0	0	0	0	0	0	0	0	0	0	0	0	0	8010	0	0	0	0	0	0	15900	8080	0	3080
E(-18.01)LTLRKTT	943.581	0.06	5.38	8.2	8.85		Pyro-glu from E	160.876	667.482	0.24102	0.0185133	1410	0	193	744	101	91.9	195	0	0	0	0	0	0	0	0	0	0	1690	889	0	1770	1250	459	0	1090	141	53.3	0
PLLLAPLP	417.288	0.17	60	8	5.96			1241.24	0	#DIV/0!	0.0184929	521	5170	642	483	0	636	948	5480	2190	990	909	510	385	0	957	0	1280	0	0	0	0	0	0	0	0	0	0	0
ALTDM(+15.99)PQM(+15.99)RMELERPGGNEITR	645.057	0.03	60	9.1	4.87	sp|P02671|FIBA_HUMAN	Oxidation (M)	0	2194.55	0	0.01836	0	0	0	0	0	0	0	0	0	0	0	0	0	0	0	0	0	1390	0	0	0	0	10200	0	5880	6670	0	0
Q(-17.03)DSHVSIS	428.192	0.03	60	9.2	5.08		Pyro-glu from Q	0	2223.64	0	0.0182477	0	0	0	0	0	0	0	0	0	0	0	0	0	0	0	0	0	0	0	0	10600	1700	6580	0	0	0	5580	0
SGEGDFLAEGGGVR	450.881	0.19	7.12	5.4	4.14	sp|P02671|FIBA_HUMAN		1.14748e+06	19530	58.7546	0.0180315	5280000	608000	59000	3290000	114000	136000	2070000	31100	40000	513000	306000	2080000	251000	330000	2690000	1080000	629000	11500	19200	0	19600	68500	14200	17800	25700	12700	16400	9230
KERELEEARKKLAQIRQQ	564.075	0.1	60	6.4	9.69			1387	0	#DIV/0!	0.017917	0	0	1350	0	3800	3890	0	0	0	1140	439	4350	0	0	1330	2070	5210	0	0	0	0	0	0	0	0	0	0	0
ERQVEELQVNHTA	518.272	0.03	60	8	4.75			0	634.727	0	0.0177187	0	0	0	0	0	0	0	0	0	0	0	0	0	0	0	0	0	0	0	0	0	0	0	3220	0	1650	1160	952
KKKKEEQ(+.98)RKRVILQSNRLRAEVFKK	1047.64	0.04	60	8.4	11.13		Deamidation (NQ)	1382.76	0	#DIV/0!	0.0176968	3580	0	0	377	0	0	2740	0	3290	350	1480	2070	0	0	4580	0	5040	0	0	0	0	0	0	0	0	0	0	0
NDN(+.98)EEGFFSA	565.717	0.15	60	8.3	3.57	sp|P02675|FIBB_HUMAN	Deamidation (NQ)	2907.06	0	#DIV/0!	0.01766	11200	1600	0	4880	0	0	7950	0	0	7790	0	8260	1280	4940	1520	0	0	0	0	0	0	0	0	0	0	0	0	0
E(-18.01)TQPGLLVASVLGLQ(+.98)KNN	622.016	0.06	60	5.5	6.1		Pyro-glu from E; Deamidation (NQ)	103.529	2729.09	0.0379355	0.0175835	0	0	0	0	0	0	0	0	0	0	0	0	0	1760	0	0	0	0	0	7440	0	0	11400	8540	0	0	0	2640
RPSLVALPGPVV	1204.73	0.06	5.54	7.2	9.75			2364.84	386.909	6.11212	0.0175676	3840	3450	2040	1700	0	5920	400	7290	2100	0	269	3750	295	5910	78.2	0	3160	4090	0	0	0	0	0	0	0	166	0	0
Q(-17.03)KKEFAILISLAIWVLVTLELLPILPLINPVIT	924.314	0.09	4.42	6.5	6.14		Pyro-glu from Q	924.959	217.818	4.24647	0.0173962	0	55.3	0	1470	2360	414	172	0	913	440	1880	2590	1430	1070	1310	0	1620	950	0	0	150	0	0	757	0	0	539	0
GAPALSN(+.98)GPQTQ(+.98)AQLLQ(+.98)PLQ	679.015	0.02	60	9.4	5.52		Deamidation (NQ)	0	311.818	0	0.0173864	0	0	0	0	0	0	0	0	0	0	0	0	0	0	0	0	0	350	0	0	914	0	0	0	0	0	1520	646
Q(-17.03)NILLLVLAM	1110.67	0.17	3.23	7.3	5.52		Pyro-glu from Q	1272.29	517	2.46092	0.0173788	859	1030	1510	1210	1640	1240	764	1150	938	1360	129	496	3090	766	2860	2070	517	1630	462	0	0	1250	0	0	1910	435	0	0
TSAGLKLILK	522.35	0.04	60	4.1	10			475.471	0	#DIV/0!	0.0173662	1560	0	1110	0	1540	0	0	0	0	1010	887	1240	0	0	736	0	0	0	0	0	0	0	0	0	0	0	0	0
SYDIAQDAPDGLAVLAAFVEVK	764.73	0.06	60	6.5	3.84			0	658.727	0	0.017365	0	0	0	0	0	0	0	0	0	0	0	0	0	0	0	0	0	756	0	0	0	0	0	0	0	3230	1880	1380
LISLMSIEVLLLAVR	835.539	0.26	60	4.9	6			11205.9	0	#DIV/0!	0.0173427	44500	22500	0	0	0	0	34900	11400	11100	17300	18800	0	0	0	30000	0	0	0	0	0	0	0	0	0	0	0	0	0
KEGIAARVR	999.605	0.14	3	7	10.84			1780.59	443.727	4.0128	0.0173329	1030	4820	2780	4320	112	4630	994	2540	142	752	1540	3350	0	2110	599	0	551	312	82	0	1210	382	770	0	485	1640	0	0
PVTVTRTTITTTT	696.387	0.27	9.82	5.1	10.18			2866.47	265.818	10.7836	0.0171695	0	2650	0	0	2890	0	1080	1720	1680	4510	0	13200	3200	4220	3740	2610	7230	0	0	0	0	0	0	0	1670	467	787	0
E(-18.01)KINQIILLKDIIYKVKTV	1127.19	0.05	60	7.5	9.41		Pyro-glu from E	3137.24	0	#DIV/0!	0.016998	0	1560	387	5760	257	0	0	7460	9070	336	13700	6150	0	0	953	4130	3570	0	0	0	0	0	0	0	0	0	0	0
G(+42.01)EDAAQAEKFQHPGSDM(+15.99)R	677.965	0.02	60	5	4.75		Acetylation (Protein N-term); Oxidation (M)	0	671.545	0	0.0169095	0	0	0	0	0	0	0	0	0	0	0	0	0	0	0	0	0	0	0	0	0	1770	1560	0	3290	0	767	0
GLPGLKGLPGN	1022.61	0.12	3.26	7.6	8.75			268.876	658	0.408627	0.0168916	98.3	188	515	0	928	571	498	0	268	205	451	52.6	430	0	0	366	0	398	696	0	185	1800	825	1130	976	441	787	0
CFCPEGMTLFSTSAQVCVPTGCPR	634.284	0.01	60	2.3	5.97	sp|P98088|MUC5A_HUMAN		0	2455.45	0	0.0168652	0	0	0	0	0	0	0	0	0	0	0	0	0	0	0	0	0	1970	0	0	5320	0	0	0	10200	9520	0	0
QLLHRVK	447.283	0.13	60	6.8	11			7112.42	0	#DIV/0!	0.0168626	256	0	16700	0	27600	24800	0	0	8300	8060	0	95.1	13700	11200	10200	0	0	0	0	0	0	0	0	0	0	0	0	0
N(+.98)PTSIGSIVLAIIVPSLLL	641.065	0.05	3.08	5.4	5.52		Deamidation (NQ)	1212.47	5337.27	0.22717	0.0168134	0	0	0	0	0	0	0	0	0	0	6840	0	0	3880	8940	0	952	0	11800	7840	4160	5970	18700	1910	2360	0	5970	0
GGGAAGGGAA	645.295	0.05	60	5.7	5.52			520.529	0	#DIV/0!	0.0167842	0	719	0	0	1190	0	0	1350	0	0	0	0	1000	1390	0	1620	1580	0	0	0	0	0	0	0	0	0	0	0
FLN(+.98)STAGTSGGAYDHS	397.159	0.17	60	4.1	5.08		Deamidation (NQ)	4784.12	0	#DIV/0!	0.0167174	0	4130	0	16400	3400	0	0	0	0	5650	4140	0	6290	5740	1880	18600	15100	0	0	0	0	0	0	0	0	0	0	0
DDPDAPLQPVTPLQLFEG	976.481	0.09	60	6.6	3.37			3546.53	0	#DIV/0!	0.016703	1460	1320	9060	0	6480	12500	0	10500	2580	741	0	0	2770	1180	0	11700	0	0	0	0	0	0	0	0	0	0	0	0
EKAYHEQLSVAEITN	577.956	0.11	60	4.1	4.75	sp|P68366|TBA4A_HUMAN		1848.59	0	#DIV/0!	0.016651	2330	0	0	816	0	0	0	0	0	2460	2740	7700	3500	0	2000	3410	6470	0	0	0	0	0	0	0	0	0	0	0
GHAGG	398.183	0.06	60	4	6.74			0	11172.7	0	0.0166399	0	0	0	0	0	0	0	0	0	0	0	0	0	0	0	0	0	0	0	0	0	0	46100	0	45100	0	12700	19000
SSSYSKQFTSSTSYN(+.98)RGDSTFESKSY	978.095	0.2	60	5.2	8.1	sp|P02671|FIBA_HUMAN	Deamidation (NQ)	42517.1	0	#DIV/0!	0.0166289	204000	1550	10300	140000	24700	18400	19400	11600	8020	2120	20800	30500	13500	47100	29400	94700	46700	0	0	0	0	0	0	0	0	0	0	0
EEEGEEEGGGEEGEE	797.772	0.14	60	2.8	3.29			15800.6	0	#DIV/0!	0.0166059	65700	23700	0	0	0	0	0	0	29100	0	45400	2110	25000	19500	42700	15400	0	0	0	0	0	0	0	0	0	0	0	0
PKIKAKKQGF	572.872	0.09	60	8.9	10.48			2468.82	0	#DIV/0!	0.0165137	4970	0	0	0	0	0	0	0	0	5660	0	8390	5240	0	4020	7220	6470	0	0	0	0	0	0	0	0	0	0	0
HPKALKDVKGQ(+.98)IGAPM(+15.99)PGKVIDIKVVAGAKVA	1085	0.08	4.41	7.3	10		Deamidation (NQ); Oxidation (M)	2532.94	286.364	8.84519	0.0165116	4330	3000	0	1510	5320	6090	3390	0	0	2100	1320	3650	0	0	10100	0	2250	0	3150	0	0	0	0	0	0	0	0	0
KCTKCQCNGHADTCN(+.98)EQDGTGCPCQN	920.322	0.21	60	5.9	5.38		Deamidation (NQ)	1978.82	0	#DIV/0!	0.01651	0	2550	6280	0	2650	4290	0	8810	0	0	2100	0	1740	2720	2500	0	0	0	0	0	0	0	0	0	0	0	0	0
INAALPINPTIIRIM(+15.99)RVLRIARVLKLLKM(+15.99)ATGM(+15.99)RALLDTV	904.144	0.02	60	10.9	12.18		Oxidation (M)	172.765	1270	0.136035	0.0164276	0	0	0	0	0	0	0	0	0	0	0	0	0	0	887	0	2050	3810	0	0	1000	0	1240	1590	1520	4810	0	0
FGVILAPAK	458.291	0.03	60	10.2	8.75			2479.41	0	#DIV/0!	0.0163426	4970	0	5770	0	8560	0	0	0	0	4260	0	7270	0	0	5440	0	5880	0	0	0	0	0	0	0	0	0	0	0
KKLADVTILTIFCLSVFALVGLQLFKGNLK	823.995	0.03	5.41	9.7	9.63			388.824	2919.73	0.133171	0.0163287	0	0	0	1500	1940	0	0	0	1970	1200	0	0	0	0	0	0	0	9510	738	0	0	0	0	9730	628	7600	901	3010
KAVLEEDEEVTEEAEMEPEDKGH	661.544	0.18	60	4.5	3.99			1508.82	0	#DIV/0!	0.0162948	0	0	2590	0	0	0	0	0	2880	1610	0	4200	1610	3090	1450	1340	6880	0	0	0	0	0	0	0	0	0	0	0
ASKRMALVL	988.584	0.05	6.02	9.9	11			262.4	1010.36	0.259708	0.0161294	1280	0	495	907	0	26.3	382	0	1070	0	0	249	0	0	0	0	51.5	2110	1180	0	1540	312	0	1160	571	701	3540	0
Q(-17.03)GVNDNEEGFFSARGHRPLDKKREEAPSLR	685.343	0.04	60	2.2	6.78	sp|P02675|FIBB_HUMAN	Pyro-glu from Q	0	8762.73	0	0.0160836	0	0	0	0	0	0	0	0	0	0	0	0	0	0	0	0	0	20500	0	0	0	0	9590	0	41700	24600	0	0
Q(-17.03)AGAAGSRMNFRPGVL	807.913	0.07	60	5.8	12		Pyro-glu from Q	8797.06	0	#DIV/0!	0.016075	7770	3380	23300	0	21700	30900	0	20500	20900	0	0	0	0	0	0	21100	0	0	0	0	0	0	0	0	0	0	0	0
Q(-17.03)FTSSTSYNRGDSTFES	948.895	0.12	60	7.8	4.37	sp|P02671|FIBA_HUMAN	Pyro-glu from Q	2424.71	0	#DIV/0!	0.0159956	0	1860	4130	0	0	0	0	8960	7980	1240	2550	0	3780	3190	0	7530	0	0	0	0	0	0	0	0	0	0	0	0
HVVVAVSVAALVLTAAILLSLRSLKSNVRGI	793.249	0.03	3.94	10.6	12.01			118.588	662.455	0.179013	0.0159014	0	0	0	1220	0	0	0	796	0	0	0	0	0	0	0	0	0	356	0	0	0	2150	703	666	1670	0	1450	292
SKGFLIPLNITNKPGL	856.517	0.11	1.84	7.7	10			1861.88	5108.64	0.364458	0.0158726	0	0	1010	1120	9510	0	4220	0	0	489	1120	333	8760	0	0	0	5090	3750	3750	695	10500	1900	2560	9940	2260	4660	7530	8650
PPPLFIRDTYNQSIPQPPPRK	821.132	0.07	2.56	9.7	10			3377.65	10869.1	0.310757	0.0157274	0	4790	7010	16100	0	12600	0	0	0	2200	7870	0	5120	1730	0	0	0	3110	6410	32700	3040	0	17000	17300	19900	15100	5000	0
GGSTSYGTGSETESPRNPSSAGSWNSGSSGPGSTGNR	1173.18	0.09	60	3	6.14	sp|P02671|FIBA_HUMAN		0	4932.27	0	0.0157071	0	0	0	0	0	0	0	0	0	0	0	0	0	0	0	0	0	5700	0	0	0	0	9000	0	22300	17000	0	255
RSGAVLYIRV	1133.68	0.11	4.96	8.8	10.84			1541.67	174.091	8.85555	0.015686	7130	96.4	1840	0	0	2560	2440	268	1390	600	1460	370	1610	1110	2640	2390	304	0	666	0	0	370	0	0	0	879	0	0
DSTFESKSY	532.232	0.09	60	1.5	4.37	sp|P02671|FIBA_HUMAN		1922.88	0	#DIV/0!	0.0156562	0	8010	0	6140	0	0	3960	3610	2520	2920	939	0	1300	3290	0	0	0	0	0	0	0	0	0	0	0	0	0	0
GDSTFESKSYKMADEAGSEADHEGTHST	744.312	0.05	60	7.4	4.43	sp|P02671|FIBA_HUMAN		7278.06	0	#DIV/0!	0.0156494	9790	837	13800	0	13400	30500	0	7020	5180	3190	2070	6640	1490	2710	0	27100	0	0	0	0	0	0	0	0	0	0	0	0
ALPGARKPH	473.792	0.01	60	13.1	11			0	14123.6	0	0.0156365	0	0	0	0	0	0	0	0	0	0	0	0	0	0	0	0	0	18700	34800	0	16900	0	1810	0	73700	9450	0	0
SSSCTSYSSCLGCLADQGCGWCLTS	630.5	0.27	60	5.8	3.8			4957.06	0	#DIV/0!	0.0155292	0	2520	0	7520	3080	0	3990	0	5620	6200	0	2980	13700	12900	2860	22900	0	0	0	0	0	0	0	0	0	0	0	0
QVHVAPSISGSN(+.98)N(+.98)MVAVVVNN	713.358	0.01	4.41	13.3	6.74		Deamidation (NQ)	90.1765	1011.09	0.0891873	0.0154169	0	0	0	0	0	0	0	0	0	0	0	753	0	0	0	0	780	4900	0	1040	425	0	780	1900	1520	0	0	557
TSRALLVLPPLKASLSNAL	982.601	0.09	2.5	7	11			1406.66	5390.64	0.260945	0.0154107	0	0	1210	93.2	3770	0	4940	0	3610	0	0	1440	0	0	8850	0	0	1760	634	0	493	13800	14400	4480	9790	0	9710	4230
SYSKQFTSSTSYNRGDSTFESKSY	690.061	0.19	60	5.9	8.1	sp|P02671|FIBA_HUMAN		10848.2	0	#DIV/0!	0.0153491	24100	2320	3520	9660	11800	3610	9030	0	6080	6270	3100	8890	9590	7240	4110	59500	15600	0	0	0	0	0	0	0	0	0	0	0
YVHPALVGKDKKGRAPIPPL	1078.65	0.04	3.76	8.7	10			2297.53	306.364	7.49935	0.0152859	1070	6110	0	0	8030	0	2400	0	2560	2700	0	3160	4280	4420	248	4080	0	0	0	0	0	1480	0	0	0	1890	0	0
FTVKLQTF	492.291	0.03	60	9.1	8.75			0	540.727	0	0.0152147	0	0	0	0	0	0	0	0	0	0	0	0	0	0	0	0	0	0	1510	0	0	2600	869	0	0	969	0	0
GDSTFESKSYKMADEAGSEADHEGTHSTKRGHAKSRPV	818.982	0.28	4.84	5.5	6.29	sp|P02671|FIBA_HUMAN		9757.94	2246.36	4.34388	0.0151952	23400	5550	13300	0	12900	31700	705	5810	4110	4550	2090	9350	4200	8360	3460	23700	12700	5920	0	0	0	0	0	0	9140	9650	0	0
RAGVIKVW	928.559	0.04	5.68	10.2	11			113.459	442.364	0.256483	0.015179	0	0	1050	0	0	0	33.1	0	198	0	0	0	0	553	0	0	94.7	199	715	0	747	1250	756	360	140	518	181	0
GKSSSYSKQFTSSTSYNRGDSTFES	685.308	0.13	60	8.2	8.43	sp|P02671|FIBA_HUMAN		9543.53	0	#DIV/0!	0.0151118	14500	5160	2220	3070	16200	6850	1980	0	4470	4270	2400	9680	10300	15200	3240	52200	10500	0	0	0	0	0	0	0	0	0	0	0
SDQ(+.98)SQASGTTGGRR	704.819	0.24	60	5.7	9.31		Deamidation (NQ)	4332.65	0	#DIV/0!	0.0150129	17800	4020	0	5090	0	0	8260	0	0	3870	2240	15100	2810	3450	10200	815	0	0	0	0	0	0	0	0	0	0	0	0
VNDNEEGFFSA	614.759	0.31	60	4.3	3.57	sp|P02675|FIBB_HUMAN		4240.59	0	#DIV/0!	0.015002	19200	8310	0	13200	0	0	4960	0	0	4020	0	4690	4260	6560	5220	1670	0	0	0	0	0	0	0	0	0	0	0	0
HPGSSFLKKTSKKL	779.467	0.1	3.69	9.9	10.48			963.529	2617.45	0.368117	0.0149943	4460	0	1250	0	3560	0	0	0	4250	0	1750	1110	0	0	0	0	0	3950	943	2330	5010	3510	5640	586	2150	2230	1760	683
HGVLHRRR	1030.63	0.04	5.61	7.6	12.3			82.8882	310.182	0.267225	0.0149163	17.1	232	0	0	429	0	382	0	0	0	187	0	0	0	0	162	0	1020	256	0	637	325	254	238	539	143	0	0
SRQLGLPGPPDVPDHAAYHPF	757.714	0.17	60	3.2	5.93			51772.4	0	#DIV/0!	0.0149131	145000	66000	47500	22400	10000	96900	13400	265000	26300	15700	35200	18200	5730	29100	34000	35200	14500	0	0	0	0	0	0	0	0	0	0	0
VVKATVIQN(+.98)SIPQTGVPVSIAV	741.115	0.03	2.91	7.6	8.72		Deamidation (NQ)	582.353	2954.55	0.197104	0.0149091	0	0	0	3330	0	0	0	0	1840	0	0	1080	0	0	3650	0	0	2500	3020	0	10100	0	4670	4920	7290	0	0	0
ATQ(+.98)VM(+15.99)AEPGEGGSET	494.201	0.06	60	6.3	3.67		Deamidation (NQ); Oxidation (M)	0	2020.91	0	0.0148513	0	0	0	0	0	0	0	0	0	0	0	0	0	0	0	0	0	0	2230	8830	2140	0	7740	0	0	0	0	1290
PIVFVLHT	463.288	0.04	60	6.9	7.17			0	1680.91	0	0.014833	0	0	0	0	0	0	0	0	0	0	0	0	0	0	0	0	0	3250	8250	0	0	3320	0	3670	0	0	0	0
KVVGVPVGSALPSTVKQ(+.98)A	869.52	0.01	60	11.1	10		Deamidation (NQ)	18.2353	203.227	0.0897286	0.0147857	0	0	310	0	0	0	0	0	0	0	0	0	0	0	0	0	0	36.1	71.5	0	0	123	486	0	790	586	70.6	72.3
HIALLVLFMVIIYAII	921.561	0.13	6.63	7	6.74			1470.67	74.7273	19.6805	0.0147783	1250	377	1330	497	1380	4360	2980	85.4	362	589	1790	0	6330	2830	841	0	0	162	0	0	0	0	0	0	0	0	660	0
RKHKRKPLG	560.354	0.03	60	3.3	12.02			0	205.636	0	0.0147089	0	0	0	0	0	0	0	0	0	0	0	0	0	0	0	0	0	0	193	0	0	0	835	766	0	0	0	468
DQYMLGILIYIQN(+.98)SDYEEITIDPTC	984.451	0.33	60	7.8	3.33		Deamidation (NQ)	18418.8	0	#DIV/0!	0.0146397	85000	57300	2920	3900	0	0	24300	39900	12600	26000	7700	19700	0	10300	12100	0	11400	0	0	0	0	0	0	0	0	0	0	0
VTEPISAESGEQVERVNEPSILEMSR	962.813	0.02	60	2.1	4.21			0	7627.27	0	0.0146153	0	0	0	0	0	0	0	0	0	0	0	0	0	0	0	0	0	35300	0	0	0	0	15100	0	23100	10400	0	0
GGMGMGP	606.232	0.02	60	6.5	5.52			0	945.455	0	0.0145157	0	0	0	0	0	0	0	0	0	0	0	0	0	0	0	0	0	0	0	4150	0	1300	1670	3280	0	0	0	0
KRKGKFKRSRLKLKDGHRISLP	883.549	0.22	60	5.6	12.02			4640.93	0	#DIV/0!	0.0144964	0	1580	0	3550	7770	17800	2790	8470	0	1100	1280	6770	3430	3170	95.8	19100	1990	0	0	0	0	0	0	0	0	0	0	0
E(-18.01)QLQNIISKFLPPVLLKLSSTQEGVRKKVM	852.245	0.02	60	9.4	10		Pyro-glu from E	255.588	1000.91	0.255356	0.0144641	0	0	0	0	1130	0	1040	762	1220	0	193	0	0	0	0	0	0	1090	0	0	0	621	889	2680	1510	1410	2810	0
KATPVAAAKT	957.578	0.23	2.44	6.4	10			822.941	2380.82	0.345655	0.0144573	853	691	752	1140	2420	1320	305	451	756	593	0	0	540	1280	486	1960	443	815	2800	0	1940	2280	204	2770	1230	3550	8590	2010
HQHSNSM(+15.99)DNLDSECSEVYQ(+.98)PLTSSDDA	757.305	0.09	60	6.9	3.95		Oxidation (M); Deamidation (NQ)	1226.47	0	#DIV/0!	0.0144456	0	1630	0	1980	0	0	3080	0	2040	0	1070	4650	3440	0	2960	0	0	0	0	0	0	0	0	0	0	0	0	0
A(+42.01)WLLVAARALLQ(+.98)LL	797.486	0.12	3.29	7	9.79		Acetylation (Protein N-term); Deamidation (NQ)	527.824	2652.18	0.199015	0.014445	0	0	1390	0	0	1030	0	426	0	591	3420	1340	0	150	626	0	0	5840	965	0	0	1020	983	4810	5610	636	0	9310
GKRPLRSTGVALSIAVGL	898.047	0.11	6.76	5.6	12.01			4693.29	427.573	10.9766	0.0143579	0	0	13400	1040	9730	2070	0	4970	206	5020	0	1430	9530	3230	10400	1860	16900	0	1030	0	342	0	0	1480	511	1310	30.3	0
RPPGFSPFR	354.195	0.1	60	5.8	12			0	13594.5	0	0.0143449	0	0	0	0	0	0	0	0	0	0	0	0	0	0	0	0	0	76000	3910	4600	3470	4070	11200	22100	7100	0	3990	13100
CPGDCFTCCTQEQN(+.98)	517.17	0.05	60	4.8	3.67	sp|Q9BYP8|KR171_HUMAN	Deamidation (NQ)	0	378.273	0	0.0143371	0	0	0	0	0	0	0	0	0	0	0	0	0	0	0	0	0	0	1220	1710	0	0	541	690	0	0	0	0
GITRKKTFKEVANAVKISA	687.756	0.22	3.6	5	10.46	sp|P29474|NOS3_HUMAN		23840.6	58918.2	0.404639	0.0142923	5090	0	60800	73100	0	0	62600	0	20500	0	61600	13700	49900	6400	51600	0	0	0	38100	88500	65500	75100	0	0	93200	77000	116000	94700
KLSGLSFKRNR	653.392	0.05	5.92	9.2	12.02			1010.59	8102.55	0.124725	0.014211	0	1870	0	2100	0	2290	1720	0	0	0	0	0	9200	0	0	0	0	13700	0	0	3130	8160	8040	32600	0	22600	898	0
TPDMNKNVA	495.241	0.06	60	4.7	5.5			741.176	9657.73	0.0767444	0.0142002	0	0	0	0	12600	0	0	0	0	0	0	0	0	0	0	0	0	0	500	0	27300	0	35000	21300	935	0	0	21200
FIALKSVLGF	547.828	0.01	60	10.1	8.75			0	1619.09	0	0.0141867	0	0	0	0	0	0	0	0	0	0	0	0	0	0	0	0	0	0	7510	0	0	0	0	0	0	2240	3400	4660
AFKVPAPK	429.27	0.09	60	5.7	10			1029.53	0	#DIV/0!	0.0141314	2140	0	2310	0	2940	3880	0	0	0	652	1510	1960	0	0	2110	0	0	0	0	0	0	0	0	0	0	0	0	0
FDKSKLKKTETQEKNPLPSKETIEQEKQAGES	735.987	0.08	60	12.8	6.39	sp|P62328|TYB4_HUMAN		6138.24	0	#DIV/0!	0.0141013	0	0	19900	0	17000	15500	0	0	3250	0	1410	12300	3000	11600	1690	0	18700	0	0	0	0	0	0	0	0	0	0	0
LAEPMTY	412.688	0.06	60	7.4	4			0	2924.55	0	0.0140969	0	0	0	0	0	0	0	0	0	0	0	0	0	0	0	0	0	0	7080	1540	0	0	9380	12900	0	0	0	1270
SYKMADEAGSEADHEGTHST	531.47	0.11	60	3.4	4.49	sp|P02671|FIBA_HUMAN		1853	0	#DIV/0!	0.0138439	7530	1320	2230	893	0	5400	260	2290	1590	771	864	0	0	1930	293	6130	0	0	0	0	0	0	0	0	0	0	0	0
HPPKKT	707.427	0.14	3.42	7.8	10			4841.18	13198.2	0.366806	0.0137847	0	3930	0	0	25700	0	0	0	10400	0	6900	4830	9500	0	6040	15000	0	31000	11800	11700	23800	21000	1320	0	2360	13600	14400	14200
GSKGEQ(+.98)GFMGPPGPQ(+.98)GQPGLPGSPGHATEG	940.09	0.08	60	10	5.4		Deamidation (NQ)	1504.18	0	#DIV/0!	0.01376	0	0	2980	1180	5350	0	666	0	2620	849	256	0	3160	0	1300	1360	5850	0	0	0	0	0	0	0	0	0	0	0
QRRRKLRRRKTISGIPR	726.482	0.1	60	7.4	12.78			8174.71	0	#DIV/0!	0.0137456	0	0	4210	0	33800	0	0	5120	0	9400	16400	15200	15600	4520	8520	0	26200	0	0	0	0	0	0	0	0	0	0	0
EYQTFFNPR	601.286	0.1	60	5.6	6.1			3835.29	0	#DIV/0!	0.0136944	7410	3110	0	6270	0	0	3860	0	0	3820	0	6500	2860	14100	2170	0	15100	0	0	0	0	0	0	0	0	0	0	0
HPVLLALRNT	1133.69	0.08	5.95	7.7	9.76			494.041	30.3636	16.2708	0.013641	418	56.7	1080	0	0	627	95.2	411	1400	201	812	0	1690	1400	101	39.5	67.3	0	0	0	0	48	0	0	0	286	0	0
QSEKPDEN(+.98)EKAFQCLSKAYKCDT	888.398	0.08	60	6.2	4.94		Deamidation (NQ)	1917.65	0	#DIV/0!	0.0136299	9260	1620	0	1540	0	0	1280	0	4150	3120	3330	0	3040	0	2320	2940	0	0	0	0	0	0	0	0	0	0	0	0
SASGYTKEMQ(+.98)ADDELLHPLGP	754.006	0.01	60	8.9	4.31		Deamidation (NQ)	0	505	0	0.0135951	0	0	0	0	0	0	0	0	0	0	0	0	0	0	0	0	0	0	0	2110	565	0	0	1760	0	1120	0	0
Q(-17.03)LALIVCPL	952.553	0.01	5.32	9.6	5.52		Pyro-glu from Q	45.1765	573.355	0.0787933	0.013555	0	0	0	168	0	0	0	0	0	0	600	0	0	0	0	0	0	466	1540	0	339	2550	932	0	85.9	136	258	0
ASPPATM(+15.99)AANESQ(+.98)EIDEDEGIHSHEGSDLS	1047.78	0.23	60	6.8	3.89		Oxidation (M); Deamidation (NQ)	6274.12	0	#DIV/0!	0.0135538	5930	0	0	0	17000	18500	0	10600	6920	1580	0	5450	9930	0	0	25700	5050	0	0	0	0	0	0	0	0	0	0	0
LAPLAEDVR	492.276	0.04	60	7.2	4.37			0	533.636	0	0.0135192	0	0	0	0	0	0	0	0	0	0	0	0	0	0	0	0	0	1180	0	0	0	0	2510	0	0	860	0	1320
PMNCPGHCLM(+15.99)FDH	759.268	0.17	60	5.4	5.99		Oxidation (M)	639.765	0	#DIV/0!	0.0134772	2270	300	0	625	0	0	1680	0	0	451	1080	2080	0	1370	1020	0	0	0	0	0	0	0	0	0	0	0	0	0
GEFVSETESRGSESGIFTNTKESSSHHPGIAEFPSRG	788.367	0.08	60	8.2	5.06	sp|P02671|FIBA_HUMAN		5548.24	0	#DIV/0!	0.0133402	0	1300	15800	0	10800	11800	0	16500	20100	0	0	0	2820	7920	0	3090	4190	0	0	0	0	0	0	0	0	0	0	0
KLIRLF	395.278	0.22	60	4.6	11			1152.47	0	#DIV/0!	0.0133355	574	4270	455	0	0	657	808	4560	1920	803	2870	426	419	0	790	0	1040	0	0	0	0	0	0	0	0	0	0	0
GLPSLAPLV	866.53	0.09	3.19	7.7	5.52			269.588	1429.82	0.188547	0.0132611	360	0	0	0	101	2290	0	0	989	0	0	0	0	112	731	0	0	5510	1430	0	619	226	288	1730	948	387	1200	3390
PQSPSLLSKRKKVKMKREKASSSGKRQSSRTVDSDPTVLSIGGSKP	991.559	0.21	60	7.1	11.17			5561.76	0	#DIV/0!	0.0132367	20800	15500	0	4170	0	0	15600	6370	0	1780	0	0	11000	0	10100	0	9230	0	0	0	0	0	0	0	0	0	0	0
LAPLAEDVRGNL	634.353	0.06	60	3.1	4.37			0	8296.36	0	0.0132124	0	0	0	0	0	0	0	0	0	0	0	0	0	0	0	0	0	9060	0	0	0	0	36000	0	23900	22300	0	0
E(-18.01)Q(+.98)DMDSMTDSM(+15.99)AS	723.741	0.03	60	8.3	3.37		Pyro-glu from E; Deamidation (NQ); Oxidation (M)	862.471	0	#DIV/0!	0.0131796	286	0	0	2110	0	0	0	0	0	2230	2350	2250	2200	2360	483	393	0	0	0	0	0	0	0	0	0	0	0	0
RDALRPAPALLAPAVLLGAALGLG	766.141	0.01	60	5.6	9.6			24	1113.64	0.021551	0.0131501	0	0	0	0	0	0	0	0	0	0	0	0	0	0	408	0	0	1230	0	0	1580	628	5060	0	3540	0	0	212
QLASERLKRATRKGTVLQPVLRRKN	973.591	0.08	6.14	8.5	12.18			2377.47	18.7273	126.952	0.013116	1350	4910	0	1370	0	2010	0	9930	2630	440	968	5650	3760	509	0	0	6890	0	0	0	0	0	0	0	0	206	0	0
HGKN(+.98)LVAILHL	1215.74	0.06	60	6.9	8.76		Deamidation (NQ)	1665.65	0	#DIV/0!	0.0130803	1280	1080	3250	0	106	965	5560	2420	465	1520	1130	0	0	600	7250	0	2690	0	0	0	0	0	0	0	0	0	0	0
PPQVIRTLLPLLLE	801.498	0.06	2.91	7.6	6.43			324.941	1460.09	0.222549	0.0130532	0	0	0	0	0	0	0	2080	0	404	0	0	0	1160	0	1880	0	720	1130	5400	0	2630	1260	620	2300	651	1350	0
DAEEEGDGEEAGASPG	760.288	0.47	31.22	4.2	3.3			126912	3626.18	34.9987	0.0129835	21400	155000	43000	392000	18700	0	477000	0	15400	111000	124000	0	96000	0	382000	132000	190000	0	9370	6240	978	17700	2750	0	0	0	0	2850
Q(-17.03)FTSSTSYNRGDSTFESKSYKMADEAGSEADHEGTHST	826.549	0.07	60	5.1	4.69	sp|P02671|FIBA_HUMAN	Pyro-glu from Q	17088.8	0	#DIV/0!	0.0129649	12500	5760	61100	0	38400	58000	0	37000	34500	2890	5360	0	5270	3430	0	26300	0	0	0	0	0	0	0	0	0	0	0	0
E(+42.01)ARPLLILIVLLGQFVSIKAQ(+.98)	1182.72	0.17	2.54	6	8.85	sp|P05997|CO5A2_HUMAN	Acetylation (Protein N-term); Deamidation (NQ)	4888.24	1427.27	3.42488	0.0129472	4560	3530	10900	3520	4930	2850	5210	0	5850	0	9390	6460	5630	1090	6210	4000	8970	0	0	0	0	3300	0	0	12400	0	0	0
LALRGLFIID	565.853	0.06	3.48	3.9	5.84			1593.53	11510	0.138447	0.0129382	0	0	0	0	5040	0	0	0	430	0	0	5810	10000	0	0	5810	0	5210	33000	0	45400	6210	8290	0	0	11600	0	16900
ALSVKEETKEDAEEKQ	459.232	0.25	60	2.2	4.42			442.941	0	#DIV/0!	0.0128743	0	433	684	0	0	0	0	303	741	750	586	1840	0	853	0	0	1340	0	0	0	0	0	0	0	0	0	0	0
QIPFLGAGIK	1043.62	0.15	6.87	8.7	8.75			489.835	1892.45	0.258836	0.0128579	407	155	434	435	339	900	0	1260	0	98	185	561	0	250	73.2	1970	1260	4480	729	854	1920	1190	991	7080	1410	1580	583	0
LQVGIPVA	796.485	0.05	5.08	10.7	5.52			78	605.364	0.128848	0.0128476	0	0	207	0	0	146	0	0	423	0	0	0	0	550	0	0	0	434	0	0	2530	0	1290	536	1280	321	0	268
AANAA	417.21	0.14	4.5	5.5	5.57			4070.59	814.382	4.99838	0.0128118	0	2810	0	6710	0	1780	5660	9590	10400	5260	4410	0	3990	2120	0	8120	8350	6.5	94	0	0	276	174	7350	1040	0	0	17.7
FVNVLSGAQESLKEKVNLRKCDILELKTLKEP	911.295	0.01	60	13.1	8.14			72.3529	674.182	0.10732	0.0127194	0	0	0	0	0	0	1230	0	0	0	0	0	0	0	0	0	0	748	0	0	0	1750	1860	0	2180	702	176	0
GLKQ(+.98)VMAIKSRVVLPYLVPKLTTPPVN(+.98)TRVLA	1168.71	0.05	60	9.4	11.17		Deamidation (NQ)	1393.76	100.909	13.8121	0.0126511	621	1080	346	1870	0	2370	0	4150	410	1600	1080	5910	1010	904	1860	0	483	0	1110	0	0	0	0	0	0	0	0	0
RTPQGIGLLAKTPLSRPVK	1016.63	0.09	6.31	8.1	12.02			262.059	1714	0.152893	0.0126399	0	0	0	0	737	0	1520	0	0	400	520	0	941	337	0	0	0	354	2300	0	0	912	1290	528	4370	6950	2150	0
TPGPLAGLV	824.498	0.06	4.91	11.5	5.19			1338.12	8583.55	0.155893	0.0126371	2860	2050	1740	1400	0	958	8630	0	0	0	1990	0	0	0	1100	0	2020	1080	740	0	549	5790	35400	16100	13200	5560	0	16000
HKLRPGIGEKPTV	716.428	0.02	60	9.6	9.99			412.412	3287	0.125468	0.0126264	0	0	0	0	0	0	0	0	0	4640	0	1500	0	871	0	0	0	0	0	13200	2420	3200	947	9450	2850	0	1870	2220
DKTERELLESYIDGR	608.643	0.14	60	2.7	4.51			16556.5	0	#DIV/0!	0.0126054	49400	12900	3900	14100	0	0	7140	68600	24300	6980	34800	6890	4820	5730	41900	0	0	0	0	0	0	0	0	0	0	0	0	0
RPPTPTLSLKPTPPAPVRLSPA	765.136	0.08	4.41	7.5	12.01			424.612	3747.82	0.113296	0.0124066	0	0	657	0	0	354	0	1530	450	0	747	490	23.4	0	0	2510	457	0	0	0	0	3600	0	5460	476	9430	7060	15200
GLLFLGLLLLPLVVAFASAE	686.091	0.01	60	11.4	4			8.23529	261.455	0.031498	0.0123723	0	140	0	0	0	0	0	0	0	0	0	0	0	0	0	0	0	0	0	698	0	0	454	0	0	644	0	1080
AHKDAIVLAVKSLPPQTLINLAVFGTLVQ(+.98)	765.219	0.01	60	5.2	8.64		Deamidation (NQ)	151.176	941.645	0.160545	0.0123387	2570	0	0	0	0	0	0	0	0	0	0	0	0	0	0	0	0	1360	72.1	608	0	0	2620	1290	1270	0	778	2360
REGNKDGVFSM	620.297	0.01	60	5.9	6.07			85.8824	883.091	0.097252	0.0123343	0	0	0	0	1460	0	0	0	0	0	0	0	0	0	0	0	0	2150	857	1520	0	806	0	3590	0	791	0	0
VALGGLPLPLARPRPGAAP	608.376	0.05	5.22	6.8	12			1473.53	6224.14	0.236744	0.0121934	0	0	0	0	0	9400	4360	6490	0	0	0	0	4800	0	0	0	0	5030	6600	45.5	6840	0	16800	9200	0	6450	17500	0
RRLRN(+.98)LGQPV	1209.72	0.04	60	10.7	12.3		Deamidation (NQ)	350.647	0	#DIV/0!	0.0121824	0	400	1580	257	932	0	659	75	221	458	0	489	215	0	0	0	675	0	0	0	0	0	0	0	0	0	0	0
Q(-17.03)LQKVPPEWK	618.344	0.06	60	5.1	8.59	sp|P02671|FIBA_HUMAN	Pyro-glu from Q	0	7818.18	0	0.0121122	0	0	0	0	0	0	0	0	0	0	0	0	0	0	0	0	0	19100	0	0	0	0	24600	0	32700	9600	0	0
KVMRLRKLAQ(+.98)QIAN	835.506	0.01	60	7.7	12.02		Deamidation (NQ)	9186.47	629.091	14.6028	0.0120708	0	9390	0	0	0	6820	28800	26100	5630	0	8890	21100	24400	8840	16200	0	0	0	0	0	0	0	6920	0	0	0	0	0
DSGEGDFLAEGGG	605.745	0.32	60	3.4	3.43	sp|P02671|FIBA_HUMAN		2115.88	0	#DIV/0!	0.012006	4310	2610	0	0	0	0	5660	0	0	0	3320	6160	1860	0	6360	0	5690	0	0	0	0	0	0	0	0	0	0	0
SSSYSKQFTSSTSYN(+.98)RGDSTFESKSYKM(+15.99)ADEAGSEADHEGTHSTKRGHA	1071.07	0.2	60	5.7	6.23	sp|P02671|FIBA_HUMAN	Deamidation (NQ); Oxidation (M)	4034.71	0	#DIV/0!	0.0119363	13000	5750	13000	9220	0	0	0	0	2640	0	2320	0	7580	11000	0	4080	0	0	0	0	0	0	0	0	0	0	0	0
LKGITAAVVIN(+.98)	1099.66	0.03	5.64	7.1	8.75		Deamidation (NQ)	72.6588	557	0.130447	0.0118882	0	85.8	333	0	0	0	224	0	32.4	0	0	184	0	0	163	0	213	561	135	0	959	205	1950	0	0	447	1870	0
E(-18.01)RKKKST	858.518	0.01	60	8.8	10.29		Pyro-glu from E	23.8235	485.745	0.0490453	0.0118414	0	0	0	0	0	0	0	0	0	0	0	405	0	0	0	0	0	1650	0	0	495	405	2020	0	483	0	72.2	218
AMKDEEKMEIQEMQLKE	528.251	0.04	60	2.5	4.42			3829.82	0	#DIV/0!	0.0118023	0	0	3930	0	0	5510	0	897	5170	3360	2380	13400	2200	9610	0	4050	14600	0	0	0	0	0	0	0	0	0	0	0
KIKDARKGPLVP	661.408	0.08	4.11	10	10.29			896.118	6825.18	0.131296	0.011702	0	0	0	0	0	3790	0	0	0	0	0	564	4670	3660	0	0	2550	8330	3300	31100	0	687	6360	1530	10300	0	4270	9200
E(-18.01)GGTGP	499.197	0.04	60	9.3	4		Pyro-glu from E	0	450.455	0	0.0116765	0	0	0	0	0	0	0	0	0	0	0	0	0	0	0	0	0	1640	525	1110	1680	0	0	0	0	0	0	0
Q(-17.03)EILESEEKGDPNKPSGFRSVKAPVT	707.111	0.12	60	7.1	5.01	sp|O00151|PDLI1_HUMAN	Pyro-glu from Q	17660.6	0	#DIV/0!	0.0116722	0	0	0	0	58100	5370	0	3620	23700	17300	13000	52600	14000	27100	8340	11400	65700	0	0	0	0	0	0	0	0	0	0	0
LTKILHVFHGLLPGFLVK	678.088	0.01	5.21	4.4	10			88.8235	731	0.12151	0.0116667	0	0	0	0	0	0	0	0	1510	0	0	0	0	0	0	0	0	0	0	2500	1100	1130	1400	1640	0	0	271	0
VNDNEEGFFSARGH	526.903	0.13	60	2.5	4.65	sp|P02675|FIBB_HUMAN		0	12298.2	0	0.0116602	0	0	0	0	0	0	0	0	0	0	0	0	0	0	0	0	0	15000	2260	0	0	7310	23700	2280	65000	10300	3160	6270
KGKGKPLQRKVKPPKKQEEKEKKGKG	986.923	0.14	60	6.9	10.42			2198.24	0	#DIV/0!	0.0116278	4990	0	0	0	3030	10200	0	3530	2100	2180	2060	3730	3940	0	1610	0	0	0	0	0	0	0	0	0	0	0	0	0
GDLTF	552.262	0.02	60	10.1	3.8			0	454.182	0	0.0115683	0	0	0	0	0	0	0	0	0	0	0	0	0	0	0	0	0	1620	0	0	877	0	0	0	1800	0	699	0
STSQGSYPCSHPSPSQGPQ(+.98)GAP	540.23	0.02	60	5.7	6.45		Deamidation (NQ)	0	576.364	0	0.0114477	0	0	0	0	0	0	0	0	0	0	0	0	0	0	0	0	0	1030	2180	2170	0	0	0	0	0	960	0	0
Q(-17.03)GVNDN(+.98)EEGFF	1239.48	0.09	60	6.7	3.57	sp|P02675|FIBB_HUMAN	Pyro-glu from Q; Deamidation (NQ)	1919.88	0	#DIV/0!	0.0114209	1140	0	2280	0	3050	6800	2320	728	1400	128	512	0	0	7180	2530	0	4570	0	0	0	0	0	0	0	0	0	0	0
VNDNEEGFFSARGHRPLDKK	579.791	0.14	60	2.4	6.73	sp|P02675|FIBB_HUMAN		0	21711.8	0	0.0113415	0	0	0	0	0	0	0	0	0	0	0	0	0	0	0	0	0	57500	2930	0	0	7290	45100	1480	103000	12100	3470	5960
RATANNQQPQQQQQQQ(+.98)QP	708.005	0.03	60	3	9.75		Deamidation (NQ)	422.941	2320	0.182302	0.0113317	0	0	0	0	7190	0	0	0	0	0	0	0	0	0	0	0	0	0	2970	3750	2250	0	0	5220	4840	2650	2830	1010
TCHGGEPEMCVAALCERPQ(+.98)GCQQ(+.98)YR	554.429	0.13	60	5.4	5.46		Deamidation (NQ)	1653.53	0	#DIV/0!	0.0113316	0	0	5070	0	0	2710	0	0	2520	1720	2280	4270	1510	0	0	1770	6260	0	0	0	0	0	0	0	0	0	0	0
YFGAF	604.288	0.17	5.9	4.8	5.52			1268.41	236.182	5.37049	0.011323	0	1750	0	783	0	0	2030	3240	2910	1810	2330	0	2630	1910	0	2170	0	551	0	0	562	0	0	0	0	295	0	1190
KPVFIKVP	464.312	0.08	60	7.4	10			1256.47	0	#DIV/0!	0.0112944	0	0	0	0	3970	0	3380	0	3450	1030	0	2340	2410	1740	0	0	3040	0	0	0	0	0	0	0	0	0	0	0
SGITGIVTKPIKGAQKGG	856.523	0.26	4.41	5.4	10.3			3093.29	6335.45	0.488251	0.0112218	0	1360	2100	1350	3770	4610	5980	0	4170	10000	2620	186	1190	7460	2340	1370	4080	7370	4400	5000	12600	1310	2500	3000	10500	6720	9140	7150
QFGN(+.98)N(+.98)PFSSLAGNSDSSSS	635.595	0.08	60	6.9	3.8		Deamidation (NQ)	745.529	0	#DIV/0!	0.0111321	2680	0	2060	0	0	1610	0	0	824	1290	1150	0	0	1490	0	0	1570	0	0	0	0	0	0	0	0	0	0	0
TQTDKALFN(+.98)RLVPSVNGVRRFSDIQIRRLKRLGIEKTDPTT	948.938	0.04	60	7.8	11.36		Deamidation (NQ)	3910	0	#DIV/0!	0.0110925	0	4660	0	9980	0	0	0	5590	0	7460	12800	0	7140	0	12100	6740	0	0	0	0	0	0	0	0	0	0	0	0
HIAHKQGL	903.525	0.01	60	10.3	8.76			22.5294	190.818	0.118067	0.0110804	0	0	383	0	0	0	0	0	0	0	0	0	0	0	0	0	0	384	670	0	450	240	191	0	164	0	0	0
ALTSEEAERSDGDPVQPAVLQVHQ	859.421	0.06	5.04	3.6	4.17			3209.41	368.182	8.71692	0.0110803	0	0	5470	0	6980	7530	0	3020	5690	1880	2240	6350	3050	0	0	1550	10800	0	2950	0	1100	0	0	0	0	0	0	0
RAGLAKVIPPK	575.383	0.08	60	3.5	11.17			1694.71	0	#DIV/0!	0.0109257	3580	5220	0	1520	0	4600	0	2650	0	0	0	0	3910	0	2550	4780	0	0	0	0	0	0	0	0	0	0	0	0
GGSTSYGTGSETESPRNPSSAGSWNSGSSGP	982.417	0.06	5.82	2.9	4.53	sp|P02671|FIBA_HUMAN		720.588	11692.7	0.061627	0.0108608	3070	0	0	0	3420	1510	0	0	0	0	0	0	0	0	0	2990	1260	19400	956	0	0	984	21100	0	31700	49100	1640	3740
VAEPVRV	769.455	0.02	5.13	9.1	5.97			760.588	8112.73	0.0937525	0.0108491	0	0	3020	0	0	0	4720	0	0	0	0	5190	0	0	0	0	0	0	0	5630	0	1960	6830	0	1220	19900	26400	27300
GDSTFESKSYKMADEAGSEADHEGTHSTKRGHA	705.514	0.07	60	4.7	5.36	sp|P02671|FIBA_HUMAN		8748.24	0	#DIV/0!	0.0108481	10700	3210	17900	4440	16100	32300	1700	0	3410	2480	0	5220	0	8210	2020	33500	7530	0	0	0	0	0	0	0	0	0	0	0
GAGLLGPAVVT	954.571	0.15	3.24	8.5	5.52			432.235	1325.55	0.326081	0.0107749	2500	0	929	439	323	0	0	222	187	600	564	216	0	0	265	658	445	500	1220	0	2810	2030	3470	626	1600	665	1660	0
PSPAPSPGPGPVPPRP	502.935	0.04	60	4.7	10.18			0	402	0	0.0107641	0	0	0	0	0	0	0	0	0	0	0	0	0	0	0	0	0	522	0	0	1560	0	0	1330	0	0	0	1010
DPREDGASVN(+.98)DQ(+.98)CGF	537.871	0.04	60	4.2	3.84		Deamidation (NQ)	0	392.273	0	0.0107068	0	0	0	0	0	0	0	0	0	0	0	0	0	0	0	0	0	0	1350	0	0	0	0	1540	0	805	0	620
E(-18.01)LANIT	642.347	0.03	60	6.6	4		Pyro-glu from E	120.588	3216.36	0.0374921	0.0106718	0	0	0	0	0	0	0	0	0	0	0	0	2050	0	0	0	0	15400	0	6320	0	0	0	2570	2350	5440	3300	0
VALGFALPLGVMVA	679.403	0.03	4.42	8.9	5.49			924.118	9681.82	0.0954488	0.0105174	0	0	0	0	0	0	0	4530	0	0	0	0	0	4500	0	6680	0	26000	10800	0	18700	0	0	13900	0	37100	0	0
ERGADGEVGQ(+.98)KGDQ(+.98)GHPGVPGFMGPPGNPGP	750.859	0.02	60	2	4.75		Deamidation (NQ)	0	858.182	0	0.0105012	0	0	0	0	0	0	0	0	0	0	0	0	0	0	0	0	0	0	0	1660	0	0	0	3570	0	0	1580	2630
AGQHG	469.214	0.02	60	11.5	6.79			0	453.909	0	0.010468	0	0	0	0	0	0	0	0	0	0	0	0	0	0	0	0	0	0	906	1850	1450	0	787	0	0	0	0	0
GSESGIFTNTKESSSHHPGIAEFPSRG	564.07	0.14	60	3.5	6.02	sp|P02671|FIBA_HUMAN		13492.9	0	#DIV/0!	0.0103759	7130	3350	25000	11800	28500	27200	0	0	0	0	0	0	13800	36200	0	53000	23400	0	0	0	0	0	0	0	0	0	0	0
MSM(+15.99)GRVTPG	476.23	0.06	60	8.6	9.5		Oxidation (M)	0	1029.09	0	0.0103673	0	0	0	0	0	0	0	0	0	0	0	0	0	0	0	0	0	0	1000	2010	1570	0	1710	5030	0	0	0	0
EGQGVGEINMATSGN(+.98)GQ(+.98)GST	474.701	0.08	60	4.3	3.8		Deamidation (NQ)	0	1835.45	0	0.0102671	0	0	0	0	0	0	0	0	0	0	0	0	0	0	0	0	0	2660	0	0	0	0	4230	0	6550	6750	0	0
DGADENDCQYPTCEQLTCDN(+.98)GACYN(+.98)T	949.013	0.07	5.89	8.1	3.25		Deamidation (NQ)	1174.12	18	65.2288	0.0102402	2990	0	0	3130	0	0	2500	0	0	1050	0	3250	2580	2690	0	1770	0	198	0	0	0	0	0	0	0	0	0	0
THSLHQ(+.98)RGLAVPDGPLGLP	656.017	0.01	60	4.5	6.61		Deamidation (NQ)	72.9412	3045.45	0.0239508	0.0101948	0	0	0	0	0	0	0	0	0	1240	0	0	0	0	0	0	0	2630	1810	0	8080	2850	0	14500	0	1720	1910	0
KTKEQVTNVGGAVVTGVT	596.666	0.16	60	4.5	8.59			1326.18	0	#DIV/0!	0.0101457	2640	0	0	0	0	0	0	0	0	1610	882	3990	703	2340	4300	2580	3500	0	0	0	0	0	0	0	0	0	0	0
CDDQ(+.98)SDEEG	499.641	0.21	60	3.9	3.33		Deamidation (NQ)	7197.06	0	#DIV/0!	0.0101378	22700	4210	23500	6170	24700	0	2540	0	8430	5270	6330	0	0	8800	9700	0	0	0	0	0	0	0	0	0	0	0	0	0
PPLAPISGPLFP	1205.72	0.08	4.48	9.2	5.96			606	112.727	5.37581	0.0101042	1310	960	261	124	1400	779	606	543	831	0	479	569	162	291	267	0	1720	0	0	0	0	0	0	0	0	1240	0	0
FTSSTSYNRGDSTFES	893.381	0.07	60	7.1	4.37	sp|P02671|FIBA_HUMAN		2514.71	0	#DIV/0!	0.0100753	3960	2580	0	2780	4980	7210	0	0	0	0	1620	1550	1760	0	0	9170	7140	0	0	0	0	0	0	0	0	0	0	0
QPAPEPPKPYSL	662.356	0.03	4.53	7.6	6			1770.59	9761.82	0.181379	0.0100566	0	0	0	0	0	0	0	18300	0	0	0	0	0	0	0	0	11800	31200	1450	13900	5880	6650	11000	19600	0	0	0	17700
KQADI	574.326	0.04	60	11.4	5.84			0	1960.91	0	0.0100429	0	0	0	0	0	0	0	0	0	0	0	0	0	0	0	0	0	0	0	6730	6840	2450	0	0	0	0	0	5550
KSAGLVKATGR	1087.66	0.13	5.98	6	11.17			1827.76	502.909	3.63438	0.0100378	198	2190	3430	2850	1790	2940	1380	2720	1420	122	5870	970	1040	141	291	2160	1560	633	0	0	751	1840	0	0	658	1650	0	0
HGM(+15.99)FEDDT	967.336	0.01	60	11.7	4.02		Oxidation (M)	0	748.182	0	0.0100073	0	0	0	0	0	0	0	0	0	0	0	0	0	0	0	0	0	0	0	0	0	2290	1560	3050	1330	0	0	0
YSAGSG	541.225	0.03	60	4.6	5.52			0	509.545	0	0.009974	0	0	0	0	0	0	0	0	0	0	0	0	0	0	0	0	0	0	0	0	1370	1290	0	0	2110	835	0	0
KYN(+.98)KEQ(+.98)QLKKITAKQKHLQ(+.98)AILGGA	947.23	0.24	60	5.9	10.13		Deamidation (NQ)	8525.29	0	#DIV/0!	0.00994978	0	0	21600	3580	0	5750	3100	27000	5330	8550	0	14600	7920	16300	0	0	31200	0	0	0	0	0	0	0	0	0	0	0
LLVLITGGK	457.32	0.06	60	5.1	8.75			2128.82	0	#DIV/0!	0.00994386	0	0	0	0	4680	6000	6150	0	5540	0	0	3180	5280	0	2600	0	2760	0	0	0	0	0	0	0	0	0	0	0
AGVMETTGPS	475.222	0.1	60	6.3	4			0	7117.27	0	0.00986868	0	0	0	0	0	0	0	0	0	0	0	0	0	0	0	0	0	2210	9570	13000	2000	36100	2590	0	10300	0	0	2520
QTSQSSSGRQ	533.249	0.08	60	7.9	9.75			646.471	5772.55	0.111991	0.00984286	0	0	0	0	6170	4820	0	0	0	0	0	0	0	0	0	0	0	0	0	19900	5720	9720	12900	14500	0	758	0	0
HAFKLPALKNFQQHILNILNKLILDQ	768.217	0.11	2.91	9.2	9.7	sp|Q99698|LYST_HUMAN		902.118	3154.36	0.28599	0.00983791	0	0	2350	3680	0	4220	0	796	1730	449	1190	0	614	0	0	0	307	8310	421	0	6610	0	987	4120	1920	2280	6430	3620
G(+42.01)EDAAQAEKFQHPGSDM	930.393	0.31	60	7.7	4.31		Acetylation (Protein N-term)	6111.18	0	#DIV/0!	0.00981127	0	0	11100	0	12200	21400	0	0	3580	2200	0	10000	1830	9380	0	13600	18600	0	0	0	0	0	0	0	0	0	0	0
KVPCVGL	715.437	0.03	60	5.1	8.22	sp|P49590|SYHM_HUMAN		0	3440.91	0	0.0097822	0	0	0	0	0	0	0	0	0	0	0	0	0	0	0	0	0	8170	0	0	11100	5280	0	0	0	0	13300	0
AIVGIGGGGGLLLLVIVAVLIAYKRKSR	702.429	0.02	5.22	6.6	11.1			70	1747.64	0.0400541	0.00963327	0	0	0	0	1190	0	0	0	0	0	0	0	0	0	0	0	0	7870	0	1660	4790	0	1180	1020	0	0	604	2100
GPQ(+.98)GQ(+.98)PGLPGPPGPPGP	754.877	0.02	60	9.5	5.52		Deamidation (NQ)	0	832	0	0.00960678	0	0	0	0	0	0	0	0	0	0	0	0	0	0	0	0	0	0	0	0	1720	0	2960	0	242	1050	0	3180
KVIKLVNK	471.331	0.08	60	5.6	10.3			1303.18	0	#DIV/0!	0.00952618	0	0	0	2160	3660	3540	0	1300	614	2350	0	3570	0	1200	0	3760	0	0	0	0	0	0	0	0	0	0	0	0
YLYGLHP	431.732	0.04	60	6.1	6.74			0	480.909	0	0.00950271	0	0	0	0	0	0	0	0	0	0	0	0	0	0	0	0	0	0	0	0	1000	1200	0	0	0	1070	2020	0
SSETF	570.246	0.44	17.9	5.2	4			17893.2	102.273	174.956	0.0094988	0	1770	0	395	3660	0	4360	41800	38900	15300	16500	11200	18000	64100	0	54100	34100	0	0	0	401	0	0	724	0	0	0	0
GSNGSPG	575.247	0.49	60	2.6	5.52	sp|Q96P44|COLA1_HUMAN		18788.8	0	#DIV/0!	0.00943959	0	3690	0	5470	0	0	12600	52200	49900	10600	19500	7850	24100	42800	0	70900	19800	0	0	0	0	0	0	0	0	0	0	0
TCCEST	643.203	0.06	5.59	8.8	4			155.186	882.091	0.17593	0.00939907	0	0	0	0	20.3	0	0	41.1	2480	21.6	8.27	0	0	0	21.8	0	45.1	1920	1760	0	1880	993	991	0	1370	0	387	402
Q(-17.03)GVN(+.98)DNEEGFFSARGHRPLDK	786.371	0.06	60	3.8	5.48	sp|P02675|FIBB_HUMAN	Pyro-glu from Q; Deamidation (NQ)	0	11445.5	0	0.00928833	0	0	0	0	0	0	0	0	0	0	0	0	0	0	0	0	0	34900	0	0	0	0	40700	0	34700	15600	0	0
CVEN(+.98)ECVCDEGFT	724.743	0.11	60	4.4	3.5		Deamidation (NQ)	8706.37	0	#DIV/0!	0.00924356	64.3	14700	0	3810	0	0	29200	1060	0	6910	19000	17000	24000	2470	23700	954	5140	0	0	0	0	0	0	0	0	0	0	0
ATTM(+15.99)HFPSEAFSLSW	576.591	0.33	11.46	3.3	5.24	sp|Q9ULL8|SHRM4_HUMAN	Oxidation (M)	2603.53	55.2727	47.1033	0.0092384	0	0	9570	0	3720	8060	0	3010	2460	2180	0	0	4920	3380	1560	5400	0	0	0	608	0	0	0	0	0	0	0	0
GPSSAPVSTDSPSLGGSQTLFHTSGQ(+.98)PRADN(+.98)PSP	668.501	0.12	4.32	3.9	5.21		Deamidation (NQ)	1512.12	4193.64	0.360574	0.00912268	0	0	0	2650	0	0	2910	0	0	0	1010	4990	2300	716	1030	0	10100	4180	3000	4900	3000	2200	5490	7390	6720	0	3550	5700
GQAGVQIGNACWELYCLEHGIQPDGQMPSDKTIGGGDDSFNTFFSETGAGK	1067.47	0.29	60	9.3	4.14			55741.2	0	#DIV/0!	0.00905357	17800	0	123000	11600	180000	212000	40400	102000	59000	12300	0	29300	15200	99500	0	20200	25300	0	0	0	0	0	0	0	0	0	0	0
STIPIVGIVAGLAVLVVTVAVVAVVAAVMCRRKS	1121.34	0.05	60	8.3	10.86			1904.29	0	#DIV/0!	0.00900469	7230	3940	4950	0	0	606	0	0	797	1870	2690	2830	4360	0	3100	0	0	0	0	0	0	0	0	0	0	0	0	0
LEGQEEEEDNRDSSMKLSFRA	618.282	0.04	60	7.6	4.25			824.706	0	#DIV/0!	0.0089857	0	1020	1280	1910	0	0	0	0	0	0	1290	0	0	2040	2070	1880	2530	0	0	0	0	0	0	0	0	0	0	0
RGRVRTVANVTVKGPILKRLPRKLDVLEG	810.997	0.01	5.31	7.8	11.84			98.2353	2723.64	0.0360677	0.00896872	0	0	0	0	0	0	0	1670	0	0	0	0	0	0	0	0	0	10300	9420	0	1390	0	0	2500	0	4880	1470	0
VLGYKIVY	954.576	0.01	60	7.3	8.47			6.05882	249.6	0.0242741	0.00895593	0	0	0	103	0	0	0	0	0	0	0	0	0	0	0	0	0	452	246	0	0	470	102	0	1180	18.6	277	0
PPGPPQAPPGLPGQ(+.98)ASLLQA	632.019	0.02	60	4.9	5.96		Deamidation (NQ)	658.235	6260	0.105149	0.00892784	0	3330	0	0	0	0	3430	4430	0	0	0	0	0	0	0	0	0	20700	0	6420	10300	0	3850	6490	21100	0	0	0
Q(+.98)SGALDPELKVSPKEAGSMGSRM(+15.99)AELCQWEI	841.891	0.03	60	7.3	4.59		Deamidation (NQ); Oxidation (M)	657.059	2228.18	0.294886	0.00890531	0	0	0	0	5860	0	0	0	0	0	0	0	0	0	0	2140	3170	2460	3260	2220	1810	1650	2210	1870	3120	4260	0	1650
A(+42.01)QQAADKYLYVDKNF	908.446	0.06	60	5.4	6		Acetylation (Protein N-term)	5425.29	0	#DIV/0!	0.00877745	5850	14000	0	0	0	0	0	11800	0	6000	6580	16200	3800	0	17100	0	10900	0	0	0	0	0	0	0	0	0	0	0
GSARIPFR	903.512	0.01	60	6.8	12			0	226.545	0	0.00864426	0	0	0	0	0	0	0	0	0	0	0	0	0	0	0	0	0	0	0	0	575	638	878	0	401	0	0	0
QKLGKAVE	436.752	0.04	60	8.8	8.59			0	757.273	0	0.00863662	0	0	0	0	0	0	0	0	0	0	0	0	0	0	0	0	0	0	0	2930	1810	2210	0	0	0	0	0	1380
PLAPGIQAPSLPPGPPPGPAPTLP	747.085	0.03	60	9	5.96			2467.06	8800	0.280348	0.00856545	0	8360	0	11000	12800	0	0	0	0	0	0	0	0	0	0	9780	0	0	3140	15700	5060	15500	17000	11300	13200	0	0	15900
LGEFVSETESRGSESGIFTNTKESSSHHPGIAEFPSRG	810.984	0.13	60	8.6	5.06	sp|P02671|FIBA_HUMAN		14892.4	0	#DIV/0!	0.00852937	10300	6710	38100	0	21900	32500	0	45900	51100	6510	9630	0	9420	21100	0	0	0	0	0	0	0	0	0	0	0	0	0	0
RLLGLAGNA	884.543	0.13	2.98	9.8	9.75			183.247	712.545	0.257172	0.0085117	681	197	254	0	0	459	309	0	219	87.2	0	0	0	0	354	0	555	1940	270	0	454	617	625	2300	521	303	363	445
LAPLAEDVRGNLR	475.273	0.11	60	2.2	6.07			0	194016	0	0.00845998	0	0	0	0	0	0	0	0	0	0	0	0	0	0	0	0	0	315000	0	0	0	27200	409000	0	875000	425000	7580	75400
GGRGGGGDHK	449.214	0.07	60	6.7	8.75			218.588	3249.09	0.0672767	0.00842847	0	0	0	1140	1680	0	0	0	0	0	0	0	0	896	0	0	0	1520	0	5660	0	0	8500	10500	0	0	0	9560
Q(-17.03)SSLYASN(+.98)ETM(+15.99)	410.829	0.05	60	3.6	4		Pyro-glu from Q; Deamidation (NQ); Oxidation (M)	0	377.182	0	0.00837405	0	0	0	0	0	0	0	0	0	0	0	0	0	0	0	0	0	0	711	0	0	0	0	908	1450	0	0	1080
QSGAWVQ(+.98)LSQ(+.98)KPDGINL	614.994	0.03	60	3	5.84		Deamidation (NQ)	0	1577.27	0	0.00833692	0	0	0	0	0	0	0	0	0	0	0	0	0	0	0	0	0	3230	0	0	0	2790	2450	0	7330	1550	0	0
KIGGDLPKGR	1040.63	0.23	3.89	6.4	9.99			3082.24	1068.36	2.88501	0.0083297	6040	2110	8310	5180	1990	548	3330	442	5770	1420	218	2800	1530	2290	3320	3380	3720	1180	2390	0	2280	818	2250	0	809	1360	665	0
LAASIFFAIKDAIRAARAQHT	568.567	0.04	60	3	10.84			0	2098.18	0	0.00832889	0	0	0	0	0	0	0	0	0	0	0	0	0	0	0	0	0	4640	0	0	0	3960	0	0	7480	7000	0	0
TTKKKK	733.486	0.15	60	5.7	10.48			2043.82	0	#DIV/0!	0.00821605	4060	0	0	2650	0	0	0	0	315	0	6940	4350	4250	3220	4070	0	4890	0	0	0	0	0	0	0	0	0	0	0
SKGIKGGKKVY	1164.7	0.09	2.72	8.3	10.18			392.341	92.0909	4.26037	0.00821408	283	236	503	511	410	984	905	262	184	0	0	558	557	271	69.8	237	699	0	0	0	0	227	0	0	0	786	0	0
KGDLELRPSTFLIIDPLLGLLKIQE	941.241	0.15	60	4.2	4.78			3561.76	0	#DIV/0!	0.00816398	4790	0	6060	0	0	9520	2670	3730	0	1400	0	5900	5620	0	0	14100	6760	0	0	0	0	0	0	0	0	0	0	0
DDVAPGGDQASPEVMLGSEPAMGESAAGAEPGPG	789.096	0.05	60	3.9	3.26			0	2090.91	0	0.00814527	0	0	0	0	0	0	0	0	0	0	0	0	0	0	0	0	0	0	3150	0	4490	1860	0	9570	0	0	0	3930
Q(-17.03)FTSSTSYNRGDSTFESKSYKM	845.355	0.05	60	6.9	8.43	sp|P02671|FIBA_HUMAN	Pyro-glu from Q	14795.1	0	#DIV/0!	0.00808592	0	867	42500	9840	0	38000	9630	0	44100	0	13100	0	9980	38000	12600	0	32900	0	0	0	0	0	0	0	0	0	0	0
GNPGLPGEPGPVGG	602.804	0.31	5.46	4.2	4			391.765	1401.55	0.279523	0.00803159	1720	0	0	0	1780	0	0	0	0	0	0	0	0	1050	0	0	2110	1940	1200	1930	2050	0	3100	2850	1620	727	0	0
SVVPSPKVSDTVVEPYN	908.969	0.11	60	5.3	4.37			32966.5	0	#DIV/0!	0.00801444	0	0	76700	0	55800	79000	0	7780	25800	5760	10900	52200	14500	49500	7890	39600	135000	0	0	0	0	0	0	0	0	0	0	0
WAVLGLGGALLAH	639.382	0.01	60	8.1	6.74			882.353	8308.18	0.106203	0.00800952	0	0	0	0	15000	0	0	0	0	0	0	0	0	0	0	0	0	1570	0	1420	13500	0	14000	19100	0	0	27500	14300
GGSTSYGTGSETESPRNPSSAGSWNSGS	902.048	0.01	60	6.6	4.53	sp|P02671|FIBA_HUMAN		0	1532.73	0	0.00799681	0	0	0	0	0	0	0	0	0	0	0	0	0	0	0	0	0	3390	0	0	0	0	3410	0	4150	5910	0	0
EKGKLSDN(+.98)ILKLEKQIN(+.98)KEKKLIRRGRT	835.256	0.19	6.51	6.1	10.38	sp|Q8WXH0|SYNE2_HUMAN	Deamidation (NQ)	27102.9	505.455	53.6209	0.00799396	0	60200	0	87900	0	0	61800	0	13100	23100	5150	36000	0	29700	85600	18100	40100	0	0	0	0	0	0	0	0	0	5560	0
PALPIFSMTLGAVSNLLALALLAQAAGRLRRRR	1173.04	0.04	5.53	11	12.6			2659.04	30.0909	88.3667	0.00798688	0	9700	1060	6010	0	0	2000	73.6	5970	1650	0	2830	4160	7540	2710	1500	0	331	0	0	0	0	0	0	0	0	0	0
SSGGSIGGRGS	921.429	0.33	60	5.9	9.47			15974.1	0	#DIV/0!	0.00797895	20700	0	0	0	13900	18800	2850	0	0	27100	0	9710	16100	35000	33400	67900	26100	0	0	0	0	0	0	0	0	0	0	0
Q(-17.03)LGLPGPPDVPDHAAYHPF	1005.99	0.1	60	9.2	5.05		Pyro-glu from Q	5238.24	0	#DIV/0!	0.00797845	5180	3800	6860	0	3360	18200	0	19200	4410	868	0	2480	1260	3710	372	12400	6950	0	0	0	0	0	0	0	0	0	0	0
AGAPPA	483.26	0.04	60	4	5.57			0	5354.55	0	0.00791947	0	0	0	0	0	0	0	0	0	0	0	0	0	0	0	0	0	10800	19200	0	0	0	11800	0	0	17100	0	0
KQKREQKLIPTKTDKKKAEKKKNKKKEI	856.273	0.02	5.25	8.4	10.35			299.235	2195.45	0.136298	0.00788264	0	0	0	0	1850	0	0	0	0	0	0	0	877	0	0	2360	0	4010	0	0	0	0	0	3580	1130	3040	7600	4790
LASVLSGPP	840.484	0.03	60	6.5	5.52			0	12181.8	0	0.00784506	0	0	0	0	0	0	0	0	0	0	0	0	0	0	0	0	0	0	45500	0	0	24700	28600	0	35200	0	0	0
KMADEAGSEADHEGTHSTKRGHAKSRPV	598.691	0.29	60	2.3	7.03	sp|P02671|FIBA_HUMAN		3889.35	0	#DIV/0!	0.00782312	5300	2190	13800	1270	11200	10100	807	9560	4000	822	0	0	682	2640	1260	1550	938	0	0	0	0	0	0	0	0	0	0	0
RVKGSTIVS	946.581	0.02	60	7.6	11			0	483.818	0	0.00782126	0	0	0	0	0	0	0	0	0	0	0	0	0	0	0	0	0	920	267	0	0	0	2280	0	278	914	663	0
ESRSPLEDETDN(+.98)TWMFKDSTE	630.275	0.1	60	5.1	3.95		Deamidation (NQ)	1566.47	0	#DIV/0!	0.00774567	0	2410	0	0	0	0	2390	0	4060	2830	0	4520	3550	3100	3770	0	0	0	0	0	0	0	0	0	0	0	0	0
KVGVSSR	732.437	0.02	5.34	10.7	11			22.5882	1859.82	0.0121454	0.00773551	0	0	0	0	0	0	0	0	0	0	384	0	0	0	0	0	0	0	3900	0	2050	0	4610	1220	8110	0	568	0
LKARKSATV	487.31	0.05	60	8.1	11.17			1075.88	0	#DIV/0!	0.00764471	1980	2910	2770	0	2900	2160	0	0	0	1860	2200	0	0	0	1510	0	0	0	0	0	0	0	0	0	0	0	0	0
GGSTSYGTGSETESPRNPSSAGSWNSGSSGPGSTGN	1121.14	0.09	60	5.9	4.53	sp|P02671|FIBA_HUMAN		0	1783.64	0	0.00763633	0	0	0	0	0	0	0	0	0	0	0	0	0	0	0	0	0	3670	0	0	0	0	4070	0	6410	5470	0	0
GLRPDVLVSLAAPKR	796.491	0.04	4.07	9.8	10.84			79.0588	397.364	0.198958	0.0076023	0	0	694	0	0	0	0	476	174	0	0	0	0	0	0	0	0	582	1180	0	764	0	359	0	0	615	390	481
TRDPLLARAELALLSIVFVAVALSN(+.98)GLVLAALAR	1173.38	0.04	60	8.8	9.17		Deamidation (NQ)	2282.29	0	#DIV/0!	0.00758021	1870	649	3380	6510	0	0	7300	0	6420	0	0	2650	1900	570	2230	0	5320	0	0	0	0	0	0	0	0	0	0	0
YVHKEKRAQ(+.98)RIPIPPPKKTRAQ(+.98)LLDDIFIR	908.044	0.04	5.64	8.6	10.53		Deamidation (NQ)	295	1973.73	0.149463	0.00752591	544	0	566	0	0	0	0	889	0	0	1130	755	0	244	0	887	0	0	1610	0	2800	2770	231	5960	6410	1930	0	0
GVGLAPGVGVAPGVGVAPG	765.927	0.01	60	8	5.52			267.647	3951.82	0.0677276	0.00752113	0	0	0	0	0	0	2700	0	0	0	0	1850	0	0	0	0	0	6810	0	4570	0	15000	1630	3960	0	0	0	11500
CPKTSFG	370.179	0.07	60	11.8	8.22			0	1932.73	0	0.00751949	0	0	0	0	0	0	0	0	0	0	0	0	0	0	0	0	0	1180	7090	0	7410	1600	1200	0	2780	0	0	0
CKNNGMCRDGWNRYVCDCSGTGY	651.259	0.23	60	4.5	7.87			7414.12	0	#DIV/0!	0.00748277	0	0	0	9730	14800	3720	0	0	4710	5930	4150	7750	11100	8300	3050	28800	24000	0	0	0	0	0	0	0	0	0	0	0
HLLVVF	727.441	0.26	10.26	7.7	6.74	sp|Q9BY79|MFRP_HUMAN		3907.65	517.745	7.54743	0.00748037	0	0	9600	3440	8110	15100	2140	3050	1080	2570	3380	3530	2260	2880	1540	3450	4300	51.4	704	2910	0	532	186	0	937	173	102	99.8
LAALKKALAAAG	549.362	0.03	60	6.2	10			2180	0	#DIV/0!	0.00740916	2620	7600	0	1120	0	2890	0	6800	4600	2470	4360	0	1500	0	3100	0	0	0	0	0	0	0	0	0	0	0	0	0
QSNVAAPGDATPPA	648.313	0.21	2.86	7.3	3.8			502.294	1242.09	0.404394	0.00729572	979	0	1520	0	1760	0	0	0	0	0	0	0	0	1130	1210	1140	800	1030	1420	653	894	1530	1710	2770	1630	742	364	920
KKKFGVES	922.551	0.03	5.59	8.5	9.7			43.6647	1827.27	0.0238961	0.00726755	531	0	47.3	0	0	0	0	0	0	0	0	0	164	0	0	0	0	5460	864	0	2050	113	117	2130	394	323	7830	819
DSQNDCSDN(+.98)SDEEN	786.745	0.23	60	6.5	3.25		Deamidation (NQ)	7770.59	0	#DIV/0!	0.00726081	17300	18400	0	3390	0	0	10800	0	0	0	9820	27100	11000	0	21400	7710	5180	0	0	0	0	0	0	0	0	0	0	0
GLEEELQFSLGSK	718.866	0.02	60	4.2	4.25			0	3053.73	0	0.00723126	0	0	0	0	0	0	0	0	0	0	0	0	0	0	0	0	0	0	0	5740	12300	7490	0	0	7220	0	841	0
LGPPGKRGLSGVPG	646.378	0.05	6.04	6.5	11			246.235	14440	0.0170523	0.00719355	0	0	0	0	0	0	0	0	0	0	0	0	526	2490	0	0	1170	0	17600	3140	0	61700	26300	0	0	12300	0	37800
S(+42.01)DKPDMAEIEKFDKSKLKKTE	502.663	0.45	19.95	3.9	6.03	sp|P62328|TYB4_HUMAN	Acetylation (Protein N-term)	169404	5900.91	28.7081	0.0071653	0	5870	525000	1300	330000	444000	0	42900	71900	27400	24200	285000	121000	296000	27300	220000	458000	4200	0	0	0	10400	5800	2310	16100	15500	10600	0
PPKKV	568.385	0.02	60	7.7	10.02			0	225.182	0	0.00708954	0	0	0	0	0	0	0	0	0	0	0	0	0	0	0	0	0	581	0	0	534	543	0	0	819	0	0	0
GRPGPCADVN	493.232	0.09	5.81	7	5.83			21	170.091	0.123463	0.0070162	0	0	0	0	357	0	0	0	0	0	0	0	0	0	0	0	0	0	0	204	378	399	436	0	304	0	150	0
YGLQKI	721.43	0.1	6.21	9.4	8.59			2037.94	15252.7	0.133612	0.00700657	0	3400	5170	0	925	18500	0	0	0	2620	0	0	1050	0	0	0	2980	6820	10100	7640	9040	7340	57600	13000	3570	4290	43400	4980
KRPFLEPKKHV	689.926	0.01	60	7	10.29			0	1922.73	0	0.00696986	0	0	0	0	0	0	0	0	0	0	0	0	0	0	0	0	0	2750	0	2690	0	9190	1540	3330	1650	0	0	0
LQPLPKSAT	954.56	0.06	60	8.3	8.75			325.088	1171.82	0.277422	0.00694266	1900	269	728	223	763	0	0	0	0	76.5	548	529	0	0	0	0	490	383	323	0	2570	1580	1700	2820	2000	324	1190	0
CMANGLW	397.677	0.03	60	9.3	5.52			0	1874.55	0	0.00689945	0	0	0	0	0	0	0	0	0	0	0	0	0	0	0	0	0	4720	0	0	0	0	2900	2210	0	0	8200	2590
GSTGN(+.98)RNPGSSGTGGTATWKPGSSGP	792.701	0.01	60	8.1	11	sp|P02671|FIBA_HUMAN	Deamidation (NQ)	0	1179.09	0	0.00682186	0	0	0	0	0	0	0	0	0	0	0	0	0	0	0	0	0	0	4790	0	0	3350	0	2540	0	0	1170	1120
EGFSFNP	797.354	0.04	60	4.7	4			0	6163.64	0	0.00681533	0	0	0	0	0	0	0	0	0	0	0	0	0	0	0	0	0	0	20700	0	17800	0	16500	12800	0	0	0	0
M(+15.99)GRKLRVM	1006.59	0.12	3.57	8.3	12.01		Oxidation (M)	343.412	1900.55	0.180691	0.00679873	550	0	722	167	917	242	0	0	248	666	783	582	0	0	0	657	304	6000	1280	0	3290	2460	582	5540	667	791	296	0
LYVCGSGA	385.179	0.06	60	4.3	5.52			0	1042.91	0	0.00667712	0	0	0	0	0	0	0	0	0	0	0	0	0	0	0	0	0	0	1550	0	0	3270	3200	0	0	0	3210	242
Q(-17.03)RACGQRGPGPPKPQEGNTVPGEWPWQ(+.98)AS	1033.82	0.04	60	9.6	8.22		Pyro-glu from Q; Deamidation (NQ)	0	894.545	0	0.0066734	0	0	0	0	0	0	0	0	0	0	0	0	0	0	0	0	0	0	2880	2270	0	0	0	0	0	0	1930	2760
S(+42.01)DKPDMAEIEKFDKSKLKKTET	522.872	0.27	11.15	1.5	6.03	sp|P62328|TYB4_HUMAN	Acetylation (Protein N-term)	260745	4208.18	61.9614	0.00664998	14000	3220	704000	3160	649000	594000	3280	70400	113000	60900	35900	421000	118000	337000	25800	479000	801000	3650	0	0	0	13000	0	0	12400	9490	7750	0
FLPLVAMVLLV	1214.74	0.04	60	9.2	5.52			1294.94	0	#DIV/0!	0.0066445	5930	614	2300	1970	1210	2580	1670	985	536	1240	789	0	0	0	580	1610	0	0	0	0	0	0	0	0	0	0	0	0
SLNQMNTQT	518.746	0.05	60	7.9	5.24			576.471	12504.5	0.0461009	0.00664076	0	0	0	0	0	0	0	0	0	0	0	0	0	0	0	9800	0	8430	38500	38300	0	36300	0	0	6990	0	9030	0
HLARAPK	792.478	0.02	5.07	5.7	11			253.235	4941.82	0.0512433	0.00662534	0	595	0	0	0	0	2340	0	0	0	0	0	0	0	1370	0	0	0	9280	17000	5850	0	0	6430	0	0	15800	0
KREEAPSLRPAPPPISGGGYR	559.555	0.04	60	4.3	9.98	sp|P02675|FIBB_HUMAN		0	680	0	0.00659166	0	0	0	0	0	0	0	0	0	0	0	0	0	0	0	0	0	1760	0	0	1520	0	2280	0	1920	0	0	0
EETKENEGFTVTAEG	820.865	0.12	60	3.7	3.98	sp|P01024|CO3_HUMAN		12601.8	0	#DIV/0!	0.00647728	13700	0	41400	7130	44400	34800	3590	14000	5970	0	0	10300	12200	6470	2290	10200	7780	0	0	0	0	0	0	0	0	0	0	0
GGCQ(+.98)LGIS	368.165	0.05	60	4.2	5.52		Deamidation (NQ)	0	221.182	0	0.00645786	0	0	0	0	0	0	0	0	0	0	0	0	0	0	0	0	0	0	0	0	580	0	609	735	0	0	0	509
FTSSTSYNRGDSTFESKSYKMA	624.284	0.21	60	4.9	8.43	sp|P02671|FIBA_HUMAN		6546.47	0	#DIV/0!	0.00641634	18400	9030	0	23100	4160	0	0	0	0	6650	2480	9780	4900	16900	4590	0	11300	0	0	0	0	0	0	0	0	0	0	0
LETPVGPLAL	505.3	0.07	60	3.6	4			0	5309.09	0	0.00637398	0	0	0	0	0	0	0	0	0	0	0	0	0	0	0	0	0	15000	0	0	12900	17700	0	0	0	12700	0	100
HGTLPRKK	936.579	0.17	2.32	7.3	11.17			296.765	725.545	0.409023	0.0063616	751	311	555	0	0	455	113	629	701	149	0	181	423	0	453	324	0	618	392	0	1030	922	845	531	1830	113	997	703
S(+42.01)DKPDMAEIEKFDKSKLKKTETQE	717.612	0.26	60	3.5	5.09	sp|P62328|TYB4_HUMAN	Acetylation (Protein N-term)	76451.2	0	#DIV/0!	0.00635221	11800	1600	19100	3270	192000	180000	0	0	68500	38700	20900	157000	45200	117000	22600	147000	275000	0	0	0	0	0	0	0	0	0	0	0
S(+42.01)DKPDMAEIEKFDKSKLKKTETQ	548.483	0.17	60	4.1	6.03	sp|P62328|TYB4_HUMAN	Acetylation (Protein N-term)	44704.7	0	#DIV/0!	0.00629018	0	0	114000	0	105000	103000	0	15600	23500	13300	7680	73400	17700	64600	0	72200	150000	0	0	0	0	0	0	0	0	0	0	0
AGDYVSEEVWYRVIQ(+.98)IVINRDDVQ	956.479	0.24	60	6.2	4.11		Deamidation (NQ)	10990	0	#DIV/0!	0.00628239	0	0	26900	0	21300	18200	0	4340	6840	3790	0	26800	4200	13100	2060	20500	38800	0	0	0	0	0	0	0	0	0	0	0
RKEKINFLRNKHKIHV	1030.63	0.05	5.7	7.4	11.17			678.235	2676.36	0.253417	0.00627952	0	0	0	484	0	1310	1840	0	3890	496	0	0	0	0	2380	1130	0	6300	1860	0	2340	1600	0	5650	6280	2390	3020	0
S(+42.01)DKPDMAEIEKFDKSKLK	431.026	0.1	60	1.9	5.97	sp|P62328|TYB4_HUMAN	Acetylation (Protein N-term)	44.8824	13994.5	0.00320713	0.00626371	0	0	0	0	0	763	0	0	0	0	0	0	0	0	0	0	0	26300	0	0	0	16100	10500	0	59100	37400	4540	0
PLLFFPL	846.509	0.01	60	7.9	5.96			30.2941	399.364	0.075856	0.00621076	0	0	0	0	0	0	0	0	0	0	397	0	0	0	0	118	0	374	0	0	1450	0	135	1170	668	0	219	377
KQAALVKAPLIPTLNTIVQ	1009.62	0.15	6.97	5.8	10			5048.82	433.636	11.643	0.00619713	0	6960	14100	2970	6620	15300	12200	1270	2820	1640	0	8670	2490	0	0	3230	7560	0	1250	0	0	0	2240	0	0	1280	0	0
KQVHLV	723.446	0.01	5.3	9.1	8.76			47.5882	564.727	0.0842676	0.00618654	0	809	0	0	0	0	0	0	0	0	0	0	0	0	0	0	0	0	521	950	0	0	562	0	1500	0	1970	709
VN(+.98)DNEEGFFSA	615.25	0.49	60	2.7	3.57	sp|P02675|FIBB_HUMAN	Deamidation (NQ)	11134.7	0	#DIV/0!	0.0061587	48600	6270	0	20800	0	0	21800	0	4750	16200	6200	0	14600	15400	16900	10200	7570	0	0	0	0	0	0	0	0	0	0	0
LGFAIVYGTIILKLYRVLQLFLSRTAQ(+.98)R	1085.33	0.12	6.61	8.2	11		Deamidation (NQ)	1949.47	203	9.6033	0.00614496	3330	1650	5820	1660	1750	539	3020	6660	535	2470	0	1540	1360	0	1210	1490	107	0	593	0	0	0	0	0	0	1640	0	0
VLTTLRPT	900.558	0.17	2.33	7.9	9.72			316.188	1045.38	0.302462	0.00613559	1430	505	0	274	223	88.2	0	1030	112	363	626	0	141	163	0	0	420	505	722	0	69.2	1730	1340	893	3120	880	1600	640
SEKVKKAKAKSRIKMKKARKILAEKRAA	1066.02	0.16	60	7.2	11.29			10670	0	#DIV/0!	0.00601293	30000	13200	0	4170	0	0	13800	26100	32500	11000	17700	0	7820	0	25100	0	0	0	0	0	0	0	0	0	0	0	0	0
CFKCGVP	377.182	0.05	60	4.7	8.06			0	1700	0	0.00599328	0	0	0	0	0	0	0	0	0	0	0	0	0	0	0	0	0	4910	4780	0	0	0	0	4880	0	0	0	4130
KKVVSSK	388.253	0.05	60	5.1	10.3			2130.71	0	#DIV/0!	0.00588135	0	0	0	1830	362	3970	2140	8230	4870	2260	0	0	3620	1900	0	4720	2320	0	0	0	0	0	0	0	0	0	0	0
SSSYFSAQGYLSSREQEGTEST	801.01	0.13	60	6.9	4.25			8125.29	0	#DIV/0!	0.00584808	21700	0	0	5440	7570	23700	0	13000	15300	5040	5260	0	0	7390	1410	27100	5220	0	0	0	0	0	0	0	0	0	0	0
Q(-17.03)PRDSPF	415.187	0.08	60	7.8	5.84		Pyro-glu from Q	0	3097.18	0	0.00584087	0	0	0	0	0	0	0	0	0	0	0	0	0	0	0	0	0	0	3290	0	11300	8180	9070	0	0	0	1240	989
ASHSHAFATV	514.261	0.09	60	4.6	6.96			0	1024.73	0	0.00577864	0	0	0	0	0	0	0	0	0	0	0	0	0	0	0	0	0	2090	1650	842	0	0	0	0	4220	0	2470	0
Q(-17.03)QCPN(+.98)MCSGHGSCD	725.74	0.32	60	4.6	5.08		Pyro-glu from Q; Deamidation (NQ)	48301.5	0	#DIV/0!	0.0057782	10700	30800	8480	74900	8370	305	69900	5170	13700	117000	63400	30200	202000	91800	0	36600	57800	0	0	0	0	0	0	0	0	0	0	0
PGSLANVVKSQ(+.98)KQVKSLPKKIN(+.98)ALKKPTVN(+.98)LTT	884.036	0.03	4.04	9.7	10.78		Deamidation (NQ)	167.882	794.909	0.211197	0.00575634	0	734	0	0	0	0	0	0	1520	0	0	0	0	0	600	0	0	2000	765	0	366	0	1830	1270	1090	575	107	741
LLTLVLSLLPPQ	653.929	0.15	60	4.7	5.52			3112.94	0	#DIV/0!	0.00567744	5860	11900	0	0	0	4260	2700	5080	6010	0	0	0	2880	2730	4220	0	7280	0	0	0	0	0	0	0	0	0	0	0
VIKAGFLVTARG	1231.74	0.08	60	7.5	11			1052.18	0	#DIV/0!	0.00553097	208	1150	2800	166	0	447	0	1160	1200	0	693	3520	432	817	524	3440	1330	0	0	0	0	0	0	0	0	0	0	0
NLSSPSAEGPPGPPS	697.339	0.02	60	3.3	4			776.471	4966.36	0.156346	0.00547362	0	0	13200	0	0	0	0	0	0	0	0	0	0	0	0	0	0	5750	7800	12400	4850	0	0	0	10200	5760	3840	4030
ADSGEGDFLAEGGGVRGPR	616.294	0.19	60	3	4.32	sp|P02671|FIBA_HUMAN		0	173536	0	0.00542246	0	0	0	0	0	0	0	0	0	0	0	0	0	0	0	0	0	293000	31200	12400	10100	121000	140000	30700	807000	344000	44400	75100
Q(-17.03)GVNDNEEGFFSARGHRPLDKK	621.806	0.05	60	1.6	6.76	sp|P02675|FIBB_HUMAN	Pyro-glu from Q	0	418964	0	0.0053671	0	0	0	0	0	0	0	0	0	0	0	0	0	0	0	0	0	681000	43800	26100	23200	176000	774000	47200	1860000	813000	70900	93400
PAGTGT	503.243	0.07	60	9.1	5.96			0	199.945	0	0.00536521	0	0	0	0	0	0	0	0	0	0	0	0	0	0	0	0	0	0	453	455	0	0	0	633	614	0	44.4	0
CSTDGRMQSN(+.98)CSLGGVGMMCSLSEQ(+.98)GK	692.784	0.11	60	5.8	6.05		Deamidation (NQ)	1549.41	0	#DIV/0!	0.00534768	0	1120	2990	0	0	2160	0	2900	1940	1320	0	0	2410	2460	0	3030	6010	0	0	0	0	0	0	0	0	0	0	0
SETESRGSESGIFTNTKESSSHHPGIAEFPSRG	701.927	0.15	60	7.6	5.44	sp|P02671|FIBA_HUMAN		82437.6	0	#DIV/0!	0.00534226	54000	37300	180000	18700	112000	266000	4520	114000	65500	26500	17300	30700	10300	284000	6620	149000	25000	0	0	0	0	0	0	0	0	0	0	0
RAGSGKAK	774.447	0.02	60	4.6	11.17			0	339.5	0	0.00531755	0	0	0	0	0	0	0	0	0	0	0	0	0	0	0	0	0	0	1230	0	197	0	387	1210	491	0	96.5	123
KLGLYRK	439.286	0.13	60	4.2	10.29			2353.88	0	#DIV/0!	0.00529967	2070	6050	865	0	697	665	5170	6490	611	480	5520	535	497	6590	3390	0	386	0	0	0	0	0	0	0	0	0	0	0
SGGESSETSSDLFEGSN(+.98)EGSSSSG	571.217	0.04	60	7.1	3.45		Deamidation (NQ)	0	1759.09	0	0.0051576	0	0	0	0	0	0	0	0	0	0	0	0	0	0	0	0	0	0	1300	0	0	2640	3540	5920	5950	0	0	0
SDMRQEKPSSPSPMPSSTPSPSLNLG	905.428	0.05	60	11.5	5.79			2957.06	0	#DIV/0!	0.00513996	0	0	6640	0	0	6580	0	3720	4580	0	0	8730	3640	3630	0	4770	7980	0	0	0	0	0	0	0	0	0	0	0
YVLLAGI	748.448	0.01	5.14	10.3	5.52			10.1176	422.636	0.0239394	0.00513513	0	0	0	0	0	0	0	0	0	172	0	0	0	0	0	0	0	1350	0	0	0	0	169	1050	499	0	1360	221
GQRGSGSGQSPSSGQHGTGFGRSSSSGPY	918.749	0.06	60	6.1	10.84			203.235	7430	0.0273533	0.00513162	0	0	0	0	0	0	0	0	0	865	0	0	2590	0	0	0	0	26200	2540	2780	0	2340	16300	0	0	22900	0	8670
LLLPKPP	389.262	0.2	60	5.5	8.75			3970.59	0	#DIV/0!	0.00512962	0	7880	3860	2860	2210	2800	5160	2360	0	3010	9010	0	5350	1880	0	17100	4020	0	0	0	0	0	0	0	0	0	0	0
KPFKAKYKLINHIRVH	664.737	0.01	60	5.5	10.58			70.5882	5313.64	0.0132844	0.00501539	0	0	0	0	0	0	0	1200	0	0	0	0	0	0	0	0	0	20100	10400	13700	0	0	9930	0	0	0	4320	0
DSGEGDFLAEGGGVRGPR	888.425	0.05	60	7.1	4.32	sp|P02671|FIBA_HUMAN		622.353	24895.5	0.0249987	0.00501536	0	0	0	0	0	0	0	0	0	0	2860	0	0	3740	0	0	3980	82400	0	0	0	8180	53200	0	77200	44600	5110	3160
LTSEEAERSDGDPVQPAVLQVHQTS	898.435	0.09	60	5.9	4.17			1608.71	0	#DIV/0!	0.00501388	0	0	3610	0	0	2580	0	2240	2300	908	0	4250	1050	2740	0	2270	5400	0	0	0	0	0	0	0	0	0	0	0
EGNLETF	405.183	0.05	60	8.1	3.8			0	1694.73	0	0.00498801	0	0	0	0	0	0	0	0	0	0	0	0	0	0	0	0	0	0	6830	3980	0	4140	752	0	0	0	1290	1650
KAKPKPPK	447.299	0.09	60	5.3	10.48			1950.47	0	#DIV/0!	0.0049721	0	3930	0	0	0	1270	4490	4170	2890	2190	3180	1390	0	728	1750	0	7170	0	0	0	0	0	0	0	0	0	0	0
RLMLTL	746.469	0.02	60	9.5	9.75			0	701	0	0.00493968	0	0	0	0	0	0	0	0	0	0	0	0	0	0	0	0	0	0	0	0	791	0	0	1980	1250	0	970	2720
GGSTSYGTGSETESPRNPSSAGSWNSGSSGPGSTGNRN	1211.19	0.08	60	6.7	6.14	sp|P02671|FIBA_HUMAN		160.941	13670.9	0.0117725	0.00490516	0	0	0	2440	296	0	0	0	0	0	0	0	0	0	0	0	0	30800	0	0	0	2300	27600	0	44600	41100	1440	2540
VNDNEEGFFSAR	692.81	0.03	60	3.5	4.14	sp|P02675|FIBB_HUMAN		1274.12	13975.5	0.0911682	0.00490022	0	0	19700	0	0	0	1960	0	0	0	0	0	0	0	0	0	0	18700	4600	0	6030	8390	24500	4080	56400	20200	3960	6870
RWQCDGQNDCGDNSDEEN(+.98)CAPRECTESEF	1113.38	0.17	60	7.1	3.8		Deamidation (NQ)	4334.71	0	#DIV/0!	0.00488184	5870	6060	0	6360	0	0	2650	11700	7600	11900	1290	0	0	11200	9060	0	0	0	0	0	0	0	0	0	0	0	0	0
SSGKKK	634.378	0.06	60	7.3	10.3			0	389.091	0	0.00487713	0	0	0	0	0	0	0	0	0	0	0	0	0	0	0	0	0	165	741	0	0	0	375	1270	1420	0	309	0
PPAGKPAM(+15.99)APKRKGGLKLNAICAKLSRQ(+.98)VVVEKR	908.041	0.01	60	10	11.17		Oxidation (M); Deamidation (NQ)	133.471	1116.55	0.119539	0.00485607	1400	0	112	0	0	0	0	0	0	0	170	553	0	34	0	0	0	0	942	0	0	2360	2670	3400	1330	1580	0	0
N(+.98)GFKSHALQLN(+.98)NRQIR	475.259	0.04	60	4.4	12.01		Deamidation (NQ)	0	15141.8	0	0.00482482	0	0	0	0	0	0	0	0	0	0	0	0	0	0	0	0	0	4180	74100	7090	11600	10100	0	10500	7700	10500	24500	6290
VFGTT	524.263	0.06	60	9.9	5.49			0	7807.27	0	0.00481079	0	0	0	0	0	0	0	0	0	0	0	0	0	0	0	0	0	0	0	5250	17500	13800	0	8860	33700	0	0	6770
PAKKLALSAK	513.836	0.09	60	9.1	10.31			1198.24	0	#DIV/0!	0.00477049	2780	0	3110	0	3220	0	0	0	0	1400	2930	1660	0	2060	1850	0	1360	0	0	0	0	0	0	0	0	0	0	0
Q(-17.03)GVN(+.98)DNEEGFFSARGHRPLDKK	497.842	0.09	60	4.7	6.76	sp|P02675|FIBB_HUMAN	Pyro-glu from Q; Deamidation (NQ)	0	73549.1	0	0.00475647	0	0	0	0	0	0	0	0	0	0	0	0	0	0	0	0	0	154000	32000	0	0	35600	71100	7410	294000	201000	7930	6000
VSGLKK	631.406	0.06	60	11.6	10			1477.06	0	#DIV/0!	0.00475552	0	0	3260	2250	3040	3030	2280	0	0	0	0	1930	0	4840	0	1830	2650	0	0	0	0	0	0	0	0	0	0	0
ALSKPLMTPKA	578.858	0.05	60	4.2	10			134.118	9502.73	0.0141136	0.00474891	0	0	2280	0	0	0	0	0	0	0	0	0	0	0	0	0	0	4690	24200	40500	0	0	0	12500	9990	0	7510	5140
E(-18.01)N(+.98)ISPEAPAG	484.221	0.05	60	5.5	3.8		Pyro-glu from E; Deamidation (NQ)	0	1936.36	0	0.00472758	0	0	0	0	0	0	0	0	0	0	0	0	0	0	0	0	0	0	0	4610	5710	0	1730	0	0	6840	0	2410
GRGSCPFG	390.68	0.07	60	5.9	8.25			519.294	31127.3	0.0166829	0.00470491	0	0	0	0	0	0	818	0	0	0	5170	0	2840	0	0	0	0	0	0	0	86400	0	74500	0	107000	23000	0	51500
LSKKRKFPK	566.375	0.09	60	4	11.33			916.471	0	#DIV/0!	0.00468297	2450	0	2190	0	2530	1570	0	0	0	1170	0	1960	0	0	1190	1420	1100	0	0	0	0	0	0	0	0	0	0	0
QM(+15.99)MAPHNQM(+15.99)MGPQG	795.305	0.21	7.98	4.7	6.74	sp|Q14686|NCOA6_HUMAN	Oxidation (M)	9271.18	104.545	88.6808	0.00466211	17200	4230	0	8790	16200	0	0	0	0	7120	0	31300	4770	17800	25300	14600	10300	0	0	0	0	1150	0	0	0	0	0	0
TIGLGLG	630.381	0.01	60	6.4	5.19			209.412	6348.27	0.0329872	0.00463912	0	0	0	0	3560	0	0	0	0	0	0	0	0	0	0	0	0	3610	9430	743	19400	23500	6990	388	0	0	0	5770
LMYVYEDSAAESGIGGGGGGGG	501.717	0.07	60	5	3.57			0	1351.27	0	0.00463857	0	0	0	0	0	0	0	0	0	0	0	0	0	0	0	0	0	0	0	0	5110	3180	0	2750	2920	0	0	904
SRPGGRASVDTKEAEGAPQVEAGKRLEEL	760.145	0.09	60	2.3	5.1			3233.53	0	#DIV/0!	0.00461339	0	4670	6170	0	4760	4210	0	0	1770	4180	2580	12400	0	3600	2490	0	8140	0	0	0	0	0	0	0	0	0	0	0
GIAGPPGARGPPGAVGSPGV	835.957	0.12	3.55	5.8	9.75			3225.88	17084.5	0.188819	0.00455854	0	0	9690	0	0	0	7920	0	0	13500	2010	7840	6530	4670	2680	0	0	0	47200	36100	14900	0	2250	41100	27200	9080	10100	0
QLLLPLSD	898.52	0.01	60	9.9	3.8			0	207.182	0	0.00453064	0	0	0	0	0	0	0	0	0	0	0	0	0	0	0	0	0	129	0	0	152	761	300	0	0	688	249	0
QNGAGEDN(+.98)QQENKPS	808.829	0.17	60	5.2	4.14		Deamidation (NQ)	3333.12	0	#DIV/0!	0.00452759	8480	3910	0	1160	0	0	3800	0	0	4070	633	4530	5260	11700	1330	8380	3410	0	0	0	0	0	0	0	0	0	0	0
RGYKKK	779.487	0.03	60	7.7	10.46			60.8824	424	0.14359	0.0044947	0	0	0	0	0	0	0	0	0	0	0	365	128	0	0	127	415	441	0	0	1410	755	839	0	0	216	679	324
SMSQ(+.98)TSGGEAGSP	598.736	0.04	60	5	4		Deamidation (NQ)	0	973.545	0	0.00446848	0	0	0	0	0	0	0	0	0	0	0	0	0	0	0	0	0	0	3750	0	1600	0	2400	909	2050	0	0	0
DSM(+15.99)LHSAINSQN(+.98)PMMSE	636.927	0.33	12.07	4.6	4.35	sp|Q09472|EP300_HUMAN	Oxidation (M); Deamidation (NQ)	8014.53	644.818	12.4291	0.0044536	34300	977	11600	8740	0	4870	7890	7950	0	8890	6490	11500	5390	10200	10200	4880	2370	0	0	0	2340	1070	1060	913	1710	0	0	0
Q(-17.03)FTSSTSYNRGDSTFESKSY	1137.99	0.12	60	3.5	6.07	sp|P02671|FIBA_HUMAN	Pyro-glu from Q	25265.9	0	#DIV/0!	0.00444953	43100	1480	26500	5620	95700	24000	3480	34900	52300	8300	1870	4130	14100	19200	4040	69800	21000	0	0	0	0	0	0	0	0	0	0	0
ASTSRGCHQVQ(+.98)VN	694.331	0.02	60	10.8	8.3		Deamidation (NQ)	121.176	5481.82	0.0221052	0.00443961	0	0	0	0	2060	0	0	0	0	0	0	0	0	0	0	0	0	0	3210	3040	2680	3030	7860	3880	26200	5120	3460	1820
GAPGPLTLKEVEELE	791.418	0.04	60	5.1	4.09	sp|Q15942|ZYX_HUMAN		1938.88	0	#DIV/0!	0.004388	0	0	3310	0	0	4820	0	4380	2710	1020	3990	0	951	2700	3150	0	5930	0	0	0	0	0	0	0	0	0	0	0
SKAALAV	659.41	0.01	60	7	8.47			0	2916.36	0	0.00435237	0	0	0	0	0	0	0	0	0	0	0	0	0	0	0	0	0	0	0	7720	10900	0	0	5810	0	0	2500	5150
SSSYSKQFTSSTSYNRGDSTFESKSYKM(+15.99)ADEAGSEADHEGTHST	961.012	0.09	60	6.3	5.01	sp|P02671|FIBA_HUMAN	Oxidation (M)	8642.94	0	#DIV/0!	0.00434056	6150	5920	15100	0	16800	17600	6540	13500	10200	0	4150	0	7090	8780	0	35100	0	0	0	0	0	0	0	0	0	0	0	0
SSYSKQFTSSTSYNRGDSTFES	822.693	0.38	60	6.7	5.79	sp|P02671|FIBA_HUMAN		42615.3	0	#DIV/0!	0.00434044	62800	11900	11100	46600	35600	14600	31200	6060	25300	28600	13800	44300	64300	71500	13400	198000	45400	0	0	0	0	0	0	0	0	0	0	0
TTGSTAGSE	405.682	0.03	60	9.8	4			0	830.455	0	0.00430761	0	0	0	0	0	0	0	0	0	0	0	0	0	0	0	0	0	0	0	0	1300	2350	525	0	0	0	2340	2620
GGGGSVCGYSGGGSGCGGGSSGGSG	932.839	0.28	60	7.2	5.51			492.235	0	#DIV/0!	0.00421963	1140	0	0	1250	0	0	856	0	0	696	649	1440	795	739	803	0	0	0	0	0	0	0	0	0	0	0	0	0
SGYPHVAGF	467.718	0.09	60	5.3	6.46			307.294	14727.3	0.0208656	0.0041715	0	0	0	0	434	4790	0	0	0	0	0	0	0	0	0	0	0	0	0	39200	0	0	23300	23200	53900	22400	0	0
REEAPSLRPAPPPISGGGYR	527.53	0.08	60	4.5	8.74	sp|P02675|FIBB_HUMAN		0	7351.55	0	0.00416797	0	0	0	0	0	0	0	0	0	0	0	0	0	0	0	0	0	26500	1860	0	0	808	23100	919	16000	3280	3010	5390
GAGTWAPAPPG	491.24	0.05	60	2.9	5.52			0	518.455	0	0.00415988	0	0	0	0	0	0	0	0	0	0	0	0	0	0	0	0	0	735	915	0	0	1300	733	2020	0	0	0	0
Q(-17.03)VKMKPKITRPPINVKII	696.095	0.03	5.43	6.1	11.33		Pyro-glu from Q	37.3529	2087.15	0.0178967	0.00413477	0	0	0	0	0	0	0	0	0	348	0	0	287	0	0	0	0	1640	1890	1910	897	0	5690	71.6	8550	0	0	2310
LKSGKRHP	922.562	0.18	3	7.4	11.17			448.529	1357.91	0.330309	0.00411613	1750	0	1180	750	0	940	261	616	0	330	248	0	1090	133	0	0	327	1760	2690	0	285	960	1810	609	2590	1100	2700	433
PCASTC	581.202	0.08	60	4.2	5.87			0	357	0	0.00407362	0	0	0	0	0	0	0	0	0	0	0	0	0	0	0	0	0	0	137	0	401	602	0	1440	907	0	0	440
INGYVPESI	496.244	0.08	60	10.3	4			210.882	6161.82	0.034224	0.00406941	0	0	0	0	785	2800	0	0	0	0	0	0	0	0	0	0	0	0	12800	17000	2360	0	0	17900	15700	0	2020	0
PPGPK	495.298	0.06	2.95	6.4	9.18	sp|P25067|CO8A2_HUMAN		276.471	1492.91	0.185189	0.00405386	0	0	4700	0	0	0	0	0	0	0	0	0	0	0	0	0	0	1500	1410	1370	1240	1150	2130	2210	3020	1120	677	595
GFFPSSLA	413.211	0.02	60	4.1	5.52			0	475.545	0	0.00404151	0	0	0	0	0	0	0	0	0	0	0	0	0	0	0	0	0	0	0	1090	0	0	1530	1500	0	0	697	414
TPSEEEQAQKQ(+.98)SGMEQGRLGSAPAASP	924.733	0.03	5.5	7.4	4.49		Deamidation (NQ)	33.7647	4573.27	0.00738305	0.00388322	0	0	0	0	0	0	0	0	0	574	0	0	0	0	0	0	0	14800	0	666	0	5750	0	0	8930	15100	0	5060
Q(-17.03)GVNDNEEGFFSARGHRPLDK	786.04	0.17	60	2.5	5.48	sp|P02675|FIBB_HUMAN	Pyro-glu from Q	0	80947.3	0	0.00386231	0	0	0	0	0	0	0	0	0	0	0	0	0	0	0	0	0	80300	14800	9520	16100	28200	217000	18200	332000	138000	20100	16200
EDKTERELLESYIDGR	651.656	0.21	60	3	4.36			16335.3	0	#DIV/0!	0.00385614	14900	8630	33200	3780	28300	14200	0	62300	41800	5160	24800	0	13900	7800	6230	12700	0	0	0	0	0	0	0	0	0	0	0	0
LYIILI	374.255	0.14	60	5.2	5.52			2328.82	0	#DIV/0!	0.00385398	2340	4430	0	0	2230	6050	8210	3600	0	2320	4640	0	1240	0	2270	0	2260	0	0	0	0	0	0	0	0	0	0	0
QNSAN(+.98)PSPSG	480.205	0.12	60	2.2	5.52		Deamidation (NQ)	28.4118	1053.36	0.0269724	0.00384453	0	0	0	0	0	0	0	0	0	0	483	0	0	0	0	0	0	247	881	838	1980	3180	0	3780	0	301	380	0
IGIGLPEPNK	519.315	0.04	60	8	6			0	12106.4	0	0.00381438	0	0	0	0	0	0	0	0	0	0	0	0	0	0	0	0	0	0	0	0	41900	35000	28000	0	15100	0	1370	11800
KSGSLRR	803.48	0.02	60	9.1	12.01			89.5882	481.009	0.186251	0.0038028	0	625	0	0	0	0	898	0	0	0	0	0	0	0	0	0	0	52.9	469	0	159	330	730	645	842	813	1200	50.2
G(+42.01)GGGGGGGGGGGGGGGGGGQ(+.98)GQ(+.98)T	520.864	0.52	60	3	5.52		Acetylation (Protein N-term); Deamidation (NQ)	23441.8	0	#DIV/0!	0.00378305	68400	25500	5880	64200	0	0	68400	3330	3900	14700	18900	0	16600	20900	51300	17100	19400	0	0	0	0	0	0	0	0	0	0	0
S(+42.01)DKPDMAEIEKFDKS	594.612	0.22	60	3.9	4.44	sp|P62328|TYB4_HUMAN	Acetylation (Protein N-term)	19202.4	0	#DIV/0!	0.00378149	0	0	58900	0	53500	46800	0	15900	22000	7130	8010	22800	5260	17200	5840	18200	44900	0	0	0	0	0	0	0	0	0	0	0
HVRGR	624.367	0.01	60	12.8	12			0	2500.36	0	0.00378144	0	0	0	0	0	0	0	0	0	0	0	0	0	0	0	0	0	0	0	354	1490	0	0	7680	5600	0	8030	4350
T(+42.01)GSGRPEPQSPRPQSWAAAN(+.98)Q(+.98)TWALGP	964.425	0.12	60	7.1	9.26		Acetylation (Protein N-term); Deamidation (NQ)	264.588	9270	0.0285424	0.00373759	0	0	0	0	0	0	1740	0	0	918	0	0	1840	0	0	0	0	29300	4390	3040	0	0	13100	0	21500	28300	0	2340
VFPVVIQAVVD	1185.71	0.11	6.81	6.7	3.8	sp|O60291|MGRN1_HUMAN		1451.71	273.364	5.31053	0.00370088	3510	1250	372	1380	822	2530	2930	2650	1160	503	0	2860	314	1730	478	890	1300	2410	0	0	0	597	0	0	0	0	0	0
NPPCTPGSEGLGQIGP	762.358	0.01	60	12.3	4			0	4817.27	0	0.00360347	0	0	0	0	0	0	0	0	0	0	0	0	0	0	0	0	0	0	10800	9580	2240	0	0	1730	19700	0	5940	3000
QNSSGVM(+15.99)GGPQKMLMPSQ(+.98)FPNQ(+.98)GQQ	674.29	0.18	60	5.3	8.75		Oxidation (M); Deamidation (NQ)	6124.71	0	#DIV/0!	0.00351093	20400	15800	12200	7120	0	2930	1590	7430	15400	1930	0	0	2520	3050	4240	1730	7780	0	0	0	0	0	0	0	0	0	0	0
Q(-17.03)NVRRVVQIFRIMRILRILKLARHST	1067.31	0.04	5.57	8.5	12.7		Pyro-glu from Q	2917.65	161.818	18.0304	0.00343645	3760	0	0	5340	7490	0	2970	5190	4300	0	0	0	7130	0	3580	6340	3500	0	0	0	0	1780	0	0	0	0	0	0
EEHGIDLAGSDRGASALQLE	690	0.12	60	4.8	4.17			3366.47	0	#DIV/0!	0.00337754	3860	3020	0	0	0	0	0	4770	0	4830	5740	9370	5550	5570	3820	0	10700	0	0	0	0	0	0	0	0	0	0	0
SSSYSKQFTSSTSYNRGDSTFES	851.703	0.24	9.61	5.7	5.79	sp|P02671|FIBA_HUMAN		234778	3529.09	66.5265	0.00337701	438000	114000	34200	276000	133000	101000	175000	5630	112000	151000	92600	251000	334000	422000	89800	1010000	252000	7180	0	0	0	0	4320	0	17900	6760	2660	0
RVLLV	599.431	0.45	4.22	4.6	9.75			6641.18	2423.64	2.74017	0.00337647	4950	13100	4380	3200	3730	5370	6650	17700	10300	4310	10100	3850	3790	4810	4790	4780	7090	1140	3270	0	1460	5360	2000	5040	3000	5390	0	0
GAPFCPECYFERFSPRCGF	738.318	0.03	60	7.8	6.12			1335.29	4532.73	0.29459	0.0033541	0	0	6720	0	5260	5160	0	0	0	0	0	0	0	0	0	5560	0	0	3530	6980	4030	5230	5000	5370	8880	5500	5340	0
PKVSPKLAPPKAG	645.402	0.12	60	3.8	10.31			1543.53	0	#DIV/0!	0.00333922	2580	0	0	2590	0	0	1880	0	2950	2770	3920	0	2350	3770	0	3430	0	0	0	0	0	0	0	0	0	0	0	0
LLGAVALVHGVGLLATDL	866.528	0.02	3.71	7.7	5.08			55.9412	492.273	0.113639	0.00331037	0	0	0	951	0	0	0	0	0	0	0	0	0	0	0	0	0	498	0	0	648	0	723	1200	111	251	604	1380
GGPAQTPLLPAKLSASNALDP	1009.56	0.07	3.28	5	5.84			4705.88	13715.5	0.343108	0.00330197	0	8270	0	14700	0	0	14500	0	0	0	14900	0	10400	10900	6330	0	0	19800	7690	19800	6330	11700	15000	7050	15600	31800	0	16100
EQVTNVGGAVVTGVT	715.875	0.11	60	5.3	4			3246.47	0	#DIV/0!	0.00328073	0	0	7490	0	0	0	0	8270	6100	2720	2000	3630	1610	4680	2250	7040	9400	0	0	0	0	0	0	0	0	0	0	0
PVLPILTWPV	1134.69	0.11	3.01	6.5	5.96			1990	440	4.52273	0.00327547	336	934	2340	108	892	4110	0	1230	3510	2290	1030	3200	1310	2760	4910	3680	1190	1240	850	0	0	1730	0	0	0	1020	0	0
PSRRLGGVSGILQVTSLLILLLLLIKAAQ(+.98)L	789.987	0.01	5.23	11.9	12.01		Deamidation (NQ)	13.0588	2361.27	0.00553042	0.00322612	0	0	0	0	222	0	0	0	0	0	0	0	0	0	0	0	0	2980	0	0	0	0	5410	774	1390	1230	4930	9260
IPLDLLLAVPVP	630.395	0.07	60	4	3.8			2336.47	0	#DIV/0!	0.00320815	5670	0	5230	0	0	0	0	0	3290	3160	5280	0	3920	0	4490	5160	3520	0	0	0	0	0	0	0	0	0	0	0
E(-18.01)CCCQDGEAWSQ(+.98)QCA	548.513	0.26	60	4.4	3.57		Pyro-glu from E; Deamidation (NQ)	5801.18	0	#DIV/0!	0.00320114	17600	4710	0	12200	0	0	10200	0	1400	0	2160	11400	5840	0	11600	12300	9210	0	0	0	0	0	0	0	0	0	0	0
AAPGQEPPEHMAELQ	802.872	0.04	60	2.4	4.24			71.7647	8058.18	0.00890582	0.00315975	0	1220	0	0	0	0	0	0	0	0	0	0	0	0	0	0	0	11700	0	0	0	7240	13800	5960	35000	9440	0	5500
FLAEGGGVR	453.245	0.12	60	4.7	6	sp|P02671|FIBA_HUMAN		21692.1	0	#DIV/0!	0.00311383	17600	27200	0	59800	0	0	44100	1140	786	31000	23800	62300	13100	13400	56400	6240	11900	0	0	0	0	0	0	0	0	0	0	0
N(+.98)QTILKKGKRENIVNIRKQREKAAILIQ(+.98)AV	869.539	0.03	5.46	7	11.12		Deamidation (NQ)	10.1765	377.645	0.0269472	0.0030048	0	0	0	0	173	0	0	0	0	0	0	0	0	0	0	0	0	0	826	0	732	0	442	0	753	0	81.1	1320
AIAAAITFLILFTIFGNALVILAV	1238.25	0.11	60	11	5.57			1686.06	0	#DIV/0!	0.00292569	0	4760	390	2690	4150	0	4780	2580	1580	1770	47	616	1020	1390	0	2890	0	0	0	0	0	0	0	0	0	0	0	0
KGLSQ(+.98)VAVTVQ(+.98)ALLE	779.45	0.03	5.41	8.9	6		Deamidation (NQ)	165.882	1537.36	0.107901	0.00290485	0	0	0	1620	0	0	0	0	0	0	1200	0	0	0	0	0	0	0	1290	2960	1080	0	421	1060	5240	1940	0	2920
E(-18.01)RVLIPV	807.495	0.02	60	8.6	6.1		Pyro-glu from E	11.5294	502.445	0.0229466	0.00288858	0	0	0	0	0	0	0	0	0	0	0	0	0	196	0	0	0	382	0	164	370	2200	767	261	807	356	138	81.9
TKAQ(+.98)VLGAVKALGFA	492.304	0.09	3.78	5.1	10		Deamidation (NQ)	1923.53	13272.7	0.144923	0.00288475	0	0	10600	0	0	0	0	0	0	5000	0	0	0	0	0	17100	0	20100	0	32000	22600	0	0	0	22200	23800	0	25300
KFITPVRRSSRIER	873.032	0.06	4.45	5.6	12			2287.18	13335.5	0.171511	0.00284637	0	0	0	0	0	1750	0	0	802	4500	4900	5870	11400	0	0	9660	0	0	11200	1870	0	15300	29800	2160	27600	14500	37700	6560
TTTSTGSGS	399.683	0.08	60	5.8	5.19			0	6913.91	0	0.00284027	0	0	0	0	0	0	0	0	0	0	0	0	0	0	0	0	0	933	0	0	0	0	26500	13900	8320	13400	1000	12000
KNEN(+.98)ESCADRDTPQ	536.553	0.04	60	6.8	4.32		Deamidation (NQ)	0	995	0	0.00282738	0	0	0	0	0	0	0	0	0	0	0	0	0	0	0	0	0	0	2450	0	0	1090	0	3910	0	915	1120	1460
KFNPGA	633.329	0.04	60	7.4	8.75			36.2941	279.727	0.129748	0.00280886	617	0	0	0	0	0	0	0	0	0	0	0	0	0	0	0	0	344	0	287	0	307	601	526	0	0	541	471
EYLENALKLIQ(+.98)GN(+.98)NPR	469.256	0.05	60	4.9	6.24		Deamidation (NQ)	0	921.727	0	0.00265408	0	0	0	0	0	0	0	0	0	0	0	0	0	0	0	0	0	3630	0	0	1600	1330	0	0	1840	479	1260	0
LQ(+.98)RPKIVQSL	1182.72	0.13	4.45	8.8	11		Deamidation (NQ)	1060.82	139.455	7.60695	0.00263676	3480	548	149	291	535	1460	172	701	1020	547	1280	1590	1930	2130	1190	566	445	0	1180	0	0	0	0	0	0	354	0	0
HTLGLPAGKAALAKAP	758.464	0.01	60	8.8	10			77.4706	702.636	0.110257	0.00261967	0	0	0	0	0	0	0	0	0	0	0	0	414	0	0	0	903	261	691	0	1330	1650	0	0	0	1870	1340	587
N(+.98)GFKSHALQLNN	448.562	0.09	60	1.3	8.76		Deamidation (NQ)	0	3801.82	0	0.00261683	0	0	0	0	0	0	0	0	0	0	0	0	0	0	0	0	0	8170	0	0	11000	0	0	0	11500	0	6880	4270
GLAAAPGLEDLQAM	678.857	0.04	3.52	7.6	3.67			1370.59	9418.18	0.145526	0.00260708	0	0	0	0	0	0	0	13000	0	0	0	10300	0	0	0	0	0	0	0	4600	21700	14600	21700	0	12500	0	16300	12200
GDSEN(+.98)AN(+.98)LAGTFCGST	773.311	0.26	60	5.4	3.67	sp|O60494|CUBN_HUMAN	Deamidation (NQ)	3164.71	0	#DIV/0!	0.00260112	6440	0	6850	0	0	0	0	1100	6650	2160	3090	3990	7560	1970	0	8440	5550	0	0	0	0	0	0	0	0	0	0	0
GHRRRILA	489.803	0.05	60	6	12.3			0	675.364	0	0.0025495	0	0	0	0	0	0	0	0	0	0	0	0	0	0	0	0	0	0	1010	378	2580	701	0	1420	0	0	1340	0
GLSIQGM(+15.99)PGMPGEKGEKGDTGLPGP	809.371	0.03	60	5.1	4.68		Oxidation (M)	43.3529	2005.45	0.0216175	0.0025449	0	0	0	0	0	0	737	0	0	0	0	0	0	0	0	0	0	0	0	4440	0	2610	6170	4350	0	0	4490	0
SSPTAAGTPNKETAGLKVGVS	658.015	0.24	60	4.7	8.31			4281.18	0	#DIV/0!	0.00252906	0	2080	9820	0	0	6500	1590	4700	3900	5510	5140	15400	0	3910	5840	8390	0	0	0	0	0	0	0	0	0	0	0	0
KGSSPCDSLL	503.75	0.34	60	4.7	5.83			2938.82	0	#DIV/0!	0.00251109	9360	1800	2800	973	2460	8690	1030	1430	0	1080	1080	3430	3260	437	2640	7880	1610	0	0	0	0	0	0	0	0	0	0	0
M(+15.99)ELAEIEAI	517.755	0.04	60	12.4	3.67		Oxidation (M)	19.8824	8045.45	0.00247125	0.00249515	0	0	0	0	0	0	0	0	0	0	0	0	0	338	0	0	0	0	0	12100	10800	0	0	22200	24200	19200	0	0
RRVIVQ(+.98)PGKT	1154.71	0.05	60	7	12.01		Deamidation (NQ)	189.053	0	#DIV/0!	0.0024684	169	334	421	0	53.9	0	197	0	192	104	485	0	397	122	179	0	560	0	0	0	0	0	0	0	0	0	0	0
VLLHRGATP	482.285	0.06	60	5.3	9.73			0	338.545	0	0.00246403	0	0	0	0	0	0	0	0	0	0	0	0	0	0	0	0	0	411	1070	0	1130	289	0	0	0	507	317	0
NTTQAECCCTQ(+.98)GASWGDACDLCPSEDSAEF	1048.39	0.39	60	4.9	3.29		Deamidation (NQ)	43001.2	0	#DIV/0!	0.00244697	121000	23900	18700	65900	0	0	0	121000	91500	17500	42500	58600	88700	0	5420	56700	19600	0	0	0	0	0	0	0	0	0	0	0
CRCDAGYTGQ(+.98)H	404.49	0.09	60	2.3	6.73		Deamidation (NQ)	0	2340.91	0	0.00239208	0	0	0	0	0	0	0	0	0	0	0	0	0	0	0	0	0	0	0	4870	2850	0	0	8320	5890	0	1100	2720
ESGSGQGYSQHGSASG	499.2	0.05	60	12.3	5.24			0	329	0	0.00238279	0	0	0	0	0	0	0	0	0	0	0	0	0	0	0	0	0	0	0	0	0	0	541	799	1030	0	822	427
V(+42.01)LM(+15.99)LGRVLVVPVTPIPTFQLRP	835.178	0.1	2.93	7.6	12		Acetylation (Protein N-term); Oxidation (M)	1204.82	5347.45	0.225308	0.00236153	2830	624	0	1860	182	0	0	0	0	270	6920	6060	0	302	0	244	1190	8130	955	2960	1510	15000	9220	5630	3010	737	4080	7590
KTIPWFV	890.522	0.01	60	10.9	8.75			0	364.218	0	0.00236132	0	0	0	0	0	0	0	0	0	0	0	0	0	0	0	0	0	140	342	0	462	113	539	149	1590	87.1	61.3	523
S(+42.01)ETAPAAPAAPAPAEKTPVKKKA	569.068	0.06	60	3.8	9.52		Acetylation (Protein N-term)	0	539.091	0	0.00235804	0	0	0	0	0	0	0	0	0	0	0	0	0	0	0	0	0	0	0	1440	1330	1610	0	0	0	0	724	826
EEDEEVTEEAEMEPEDKGH	744.627	0.04	60	3.6	3.8			4721.18	0	#DIV/0!	0.0023286	0	0	13100	0	11100	6840	0	8170	1310	2810	3080	9610	3080	3980	0	4980	12200	0	0	0	0	0	0	0	0	0	0	0
SSKITHRIHWESASLL	467.006	0.27	60	3.3	8.51	sp|P01024|CO3_HUMAN		6858.82	0	#DIV/0!	0.00232338	0	10200	20800	0	11900	11100	0	21500	0	4610	6700	6530	4750	4090	0	7860	6560	0	0	0	0	0	0	0	0	0	0	0
Q(-17.03)GVNDNEEGFFSARGHRPLD	743.342	0.09	5.99	4.5	4.75	sp|P02675|FIBB_HUMAN	Pyro-glu from Q	3076.94	28373.6	0.108444	0.00229722	34200	0	0	3200	0	0	6880	0	0	818	0	2010	1120	0	4080	0	0	20700	8000	8890	11700	15700	90600	8320	75900	46400	15300	10600
GVLHVPIT	835.506	0.02	60	11	6.74			78.2353	1353.36	0.057808	0.00222934	0	0	0	0	0	0	1330	0	0	0	0	0	0	0	0	0	0	464	1640	545	1620	422	1790	5370	2160	202	483	191
Q(-17.03)GVNDN(+.98)EEGFFSA	699.279	0.04	60	6.1	3.57	sp|P02675|FIBB_HUMAN	Pyro-glu from Q; Deamidation (NQ)	31431.6	0	#DIV/0!	0.00222675	83400	104	35900	1290	71000	45800	1110	0	29100	46700	0	533	4400	48400	87000	30100	49500	0	0	0	0	0	0	0	0	0	0	0
KCKVAN	662.375	0.08	60	2	9.31			0	7654.55	0	0.00221252	0	0	0	0	0	0	0	0	0	0	0	0	0	0	0	0	0	13300	13600	19400	24900	13000	0	0	0	0	0	0
KVAVHSGGR	910.528	0.01	60	9.7	11	sp|O95714|HERC2_HUMAN		0	202.7	0	0.0021873	0	0	0	0	0	0	0	0	0	0	0	0	0	0	0	0	0	0	281	0	316	606	0	625	0	362	39.7	0
GDSTFESKSYKMAD	522.565	0.06	60	4.7	4.56	sp|P02671|FIBA_HUMAN		0	1548.18	0	0.00218328	0	0	0	0	0	0	0	0	0	0	0	0	0	0	0	0	0	2170	1260	1850	0	0	0	5460	4380	0	0	1910
GIFPILFV	905.563	0.02	5.54	9.9	5.52			39.5412	801.518	0.0493329	0.00218248	0	0	0	0	0	0	0	0	147	0	304	0	0	11.2	210	0	0	198	403	0	708	687	2370	212	1760	88.7	2390	0
FTFDNVLPGK	569.303	0.05	60	6.8	5.84			1681.76	0	#DIV/0!	0.00215844	0	0	2310	0	3770	2360	0	0	4110	1550	2810	2640	1580	0	0	4380	3080	0	0	0	0	0	0	0	0	0	0	0
KAALHPSPKTLT	632.381	0.01	60	7.6	10			0	5348.73	0	0.00214671	0	0	0	0	0	0	0	0	0	0	0	0	0	0	0	0	0	4440	216	2740	0	4720	3790	0	18800	16200	7930	0
DSGEGDFLAEGGGVR	733.33	0.13	6.67	4.5	3.92	sp|P02671|FIBA_HUMAN		6.15753e+06	244727	25.1608	0.00214291	12200000	4850000	1170000	19300000	910000	903000	13200000	484000	581000	2990000	3260000	13700000	3240000	4700000	11700000	4840000	6650000	171000	288000	177000	231000	727000	213000	129000	292000	135000	198000	131000
PPVAPVLPPAVPLL	690.43	0.06	4.44	8	5.96			779.059	8145.64	0.0956412	0.00212858	0	0	0	0	3970	464	0	320	5280	0	0	0	0	3210	0	0	0	2520	20600	9800	1380	18400	0	2090	20900	0	13700	212
GAVEGKEELPDENKSLEETLH	581.786	0.13	60	3.2	4.3			19271.2	0	#DIV/0!	0.00210743	2780	0	44700	0	50100	44200	1010	1970	16000	7940	4620	35500	11400	24500	5490	36000	41400	0	0	0	0	0	0	0	0	0	0	0
D(+42.01)SGEGDFLAEGGGVR	754.335	0.19	6.91	8.2	3.92	sp|P02671|FIBA_HUMAN	Acetylation (Protein N-term)	46401.2	209.091	221.919	0.00206798	70800	22200	8800	62000	6320	8950	109000	4840	6610	17200	19600	168000	63100	32300	82700	65800	40600	0	0	0	0	2300	0	0	0	0	0	0
STCGPNSI	389.685	0.07	60	2.6	5.24			0	5522.73	0	0.00202782	0	0	0	0	0	0	0	0	0	0	0	0	0	0	0	0	0	6160	2890	3100	2980	2070	24900	6390	2750	3510	0	6000
QLLHLLE	865.519	0.02	60	8.9	5.24			9.23529	229.882	0.0401741	0.00199996	0	157	0	0	0	0	0	0	0	0	0	0	0	0	0	0	0	212	622	0	118	193	818	0	223	255	87.7	0
TPRDTTMT	461.724	0.05	60	9.8	5.5	sp|P98194|AT2C1_HUMAN		0	9109.09	0	0.00198161	0	0	0	0	0	0	0	0	0	0	0	0	0	0	0	0	0	0	21800	9190	0	11900	0	4510	0	0	29200	23600
GSGKTLAFVIPVVQALLSRVVCHIRALVVLPTKE	1205.39	0.05	60	7.6	10.05			3680	0	#DIV/0!	0.00195724	12200	0	5730	3440	6970	0	3160	0	1870	2510	8070	4420	2730	460	8130	0	2870	0	0	0	0	0	0	0	0	0	0	0
S(+42.01)DKPDM(+15.99)AEIEKFDKSKLK	542.53	0.11	60	3.8	5.97	sp|P62328|TYB4_HUMAN	Acetylation (Protein N-term); Oxidation (M)	0	2656.91	0	0.00195241	0	0	0	0	0	0	0	0	0	0	0	0	0	0	0	0	0	5360	0	0	0	2800	5440	586	10100	2820	2120	0
RPATLLWLIQKLSRIAKLEAAYSPRNPLKR	1168.37	0.11	6.64	5.9	11.58			3648.24	176.364	20.6859	0.00194441	8750	6560	11000	4640	6470	2840	1090	1750	1160	2960	0	0	5420	1200	2040	0	6140	0	0	0	0	0	0	0	1940	0	0	0
KSVREKG	803.491	0.03	60	6.5	9.99			58.2588	602.255	0.0967346	0.00193464	0	0	0	0	465	0	464	0	0	61.4	0	0	0	0	0	0	0	141	541	0	179	244	1650	320	1610	477	1370	92.8
SQGDATH	358.148	0.02	60	6.5	5.06			0	2622.73	0	0.00192414	0	0	0	0	0	0	0	0	0	0	0	0	0	0	0	0	0	0	4300	0	7250	5170	0	7590	0	0	0	4540
MATLSSVNG	440.209	0.08	60	4	5.28			0	9266.36	0	0.00191057	0	0	0	0	0	0	0	0	0	0	0	0	0	0	0	0	0	0	0	1530	21700	29300	0	10800	0	20200	0	18400
DSGGQEANNPN(+.98)CCN(+.98)CI	547.519	0.21	60	5.1	3.67		Deamidation (NQ)	8808.24	0	#DIV/0!	0.0019078	15600	12300	0	14200	0	0	16300	0	20700	10000	22300	0	16700	0	15700	0	5940	0	0	0	0	0	0	0	0	0	0	0
AASKVAVP	742.459	0.01	60	10.2	8.8			21.1765	746.727	0.028359	0.00188258	0	0	0	0	0	0	360	0	0	0	0	0	0	0	0	0	0	2740	900	0	1540	132	1180	0	0	150	402	1170
PQGRKTPEL	513.295	0.04	60	10.2	9.18			0	10392.7	0	0.00187674	0	0	0	0	0	0	0	0	0	0	0	0	0	0	0	0	0	2000	0	0	8070	5500	44200	14900	14900	6750	4000	14000
RPPQAPKK	461.302	0.12	60	7.8	11.17			2367.35	0	#DIV/0!	0.00186105	5320	247	3660	3120	0	978	4730	6320	5600	2060	0	1400	0	4070	2740	0	0	0	0	0	0	0	0	0	0	0	0	0
Q(-17.03)GVNDNEEGFFSARGH	873.876	0.07	5.91	2.7	4.65	sp|P02675|FIBB_HUMAN	Pyro-glu from Q	813.529	93318.2	0.0087178	0.00185861	7880	0	0	0	0	0	1240	0	0	0	0	0	2000	0	2710	0	0	153000	25500	10000	0	42900	152000	14100	352000	210000	31300	35700
LVGGLTAGAALLV	1154.7	0.18	2.88	7.7	5.52			1957.35	471.909	4.14773	0.00184752	173	2150	990	5340	1760	2140	732	1430	2340	1650	2430	650	2610	570	1580	4380	2350	685	607	0	939	0	1260	0	0	1700	0	0
E(-18.01)AGEAGAQHQ	490.224	0.02	60	4.3	4.51		Pyro-glu from E	0	645.818	0	0.0018267	0	0	0	0	0	0	0	0	0	0	0	0	0	0	0	0	0	0	1600	1550	1150	1840	0	0	0	0	0	964
KSLPKLVH	921.574	0.13	4.21	8.1	10			8577.02	31727.3	0.270336	0.00182548	265	0	23200	0	58000	0	0	1360	0	68.4	0	0	116	20700	0	20800	21300	57700	24100	41700	19700	50400	57000	13400	34400	38700	11900	0
SRFGRRRPFILVLAIGALLGLSLLLNGRD	799.231	0.02	5.29	11.1	12.18			89.4118	2175.36	0.041102	0.00178512	0	0	0	0	0	0	0	0	1520	0	0	0	0	0	0	0	0	0	0	0	7170	879	3160	0	2150	5090	4250	1230
QSIIPGIL	840.514	0.1	2.98	9.2	5.52			149.565	683.082	0.218956	0.00177927	198	0	0	0	0	44.6	0	700	0	0	714	0	405	0	0	481	0	588	473	81.9	506	823	1990	265	1380	291	517	599
T(+42.01)EKAPEPHVEEDDDDELDSKLN	856.379	0.1	6.64	9.2	3.92	sp|P52566|GDIR2_HUMAN	Acetylation (Protein N-term)	7100	361.818	19.6231	0.00177349	2950	1600	21100	1270	14600	13300	0	7630	7430	3650	3210	7240	3320	5890	2850	5360	19300	0	3980	0	0	0	0	0	0	0	0	0
RGPVSGTEPEPVYSMEAADYREAS	866.727	0.04	60	8.7	4.25			2560.59	0	#DIV/0!	0.00176682	0	0	6020	0	0	0	0	5410	3360	2510	4620	6210	4440	4660	2450	3850	0	0	0	0	0	0	0	0	0	0	0	0
RSTRPPAT	443.259	0.05	60	13.3	12			0	3248.18	0	0.00176283	0	0	0	0	0	0	0	0	0	0	0	0	0	0	0	0	0	8750	0	5890	8840	5010	0	0	0	0	7240	0
TSSTSYNRGDSTFESKSYKMAD	616.275	0.02	60	5	5.79	sp|P02671|FIBA_HUMAN		0	642.182	0	0.00175977	0	0	0	0	0	0	0	0	0	0	0	0	0	0	0	0	0	1690	1620	1300	1580	0	0	0	0	0	0	874
SSDVMLNGF	485.226	0.07	60	4.3	3.8			0	5460.91	0	0.00174039	0	0	0	0	0	0	0	0	0	0	0	0	0	0	0	0	0	0	10600	0	7970	13200	15300	0	13000	0	0	0
QIMLEVSSSHDESKTC	598.621	0.06	60	3	4.65			0	1366.27	0	0.00173136	0	0	0	0	0	0	0	0	0	0	0	0	0	0	0	0	0	1410	1280	0	0	2270	849	1780	5560	0	1880	0
SYKMADEAGSEADHEGTHSTKRGHA	535.24	0.27	10.6	4.4	5.76	sp|P02671|FIBA_HUMAN		8825.88	577.182	15.2913	0.00169365	24200	6450	11200	6030	17500	16200	2950	4060	6600	2180	2360	3050	5550	7600	3240	26600	4270	0	0	0	0	0	1750	0	4230	0	0	369
KKKMKSKKK	567.38	0.1	60	8.5	10.78			2811.18	0	#DIV/0!	0.00169187	3560	0	1980	0	4120	1320	0	7360	0	2850	0	4310	6740	4670	4080	0	6800	0	0	0	0	0	0	0	0	0	0	0
VKMVKDLVASLKPGTQVIVLSTRLLKPLNIPEL	904.059	0.02	5.32	6.4	10			64.8235	967.636	0.0669916	0.00168594	0	0	0	0	0	778	0	0	0	0	0	0	0	0	0	324	0	0	364	0	1910	1030	3200	1250	1010	0	1880	0
AIPAILIGAIGAS	583.86	0.12	60	5.6	5.57			2895.88	0	#DIV/0!	0.0016744	7400	5470	6870	6160	2660	3160	0	0	0	2230	7210	0	2380	1170	0	2290	2230	0	0	0	0	0	0	0	0	0	0	0
GPSGEQPMEGSH	404.825	0.1	60	1.3	4.51			0	2391.82	0	0.00163145	0	0	0	0	0	0	0	0	0	0	0	0	0	0	0	0	0	0	3070	8270	5220	2930	0	0	0	0	1620	5200
GVVAGVVAVALLIALAVLVR	635.09	0.03	60	8	9.75			0	560.504	0	0.00161586	0	0	0	0	0	0	0	0	0	0	0	0	0	0	0	0	0	3.54	0	0	1510	769	1540	1460	0	222	661	0
DGLTMN(+.98)YCRN(+.98)PDADTGPWCFTMDPSIRWEYCN(+.98)LTRCSDTEGT	968.391	0.24	60	8.6	4.09		Deamidation (NQ)	13520	0	#DIV/0!	0.00160802	8740	7880	26100	0	5320	34100	11400	20900	25900	1420	9910	4470	0	19500	0	42100	12100	0	0	0	0	0	0	0	0	0	0	0
AEAPP	484.23	0.12	60	4.5	4			0	1495.27	0	0.00160796	0	0	0	0	0	0	0	0	0	0	0	0	0	0	0	0	0	0	0	3410	2710	2200	4520	3410	198	0	0	0
Q(+.98)SGCTSSCTPSCCQ(+.98)Q(+.98)SSCQPACCTS	830.585	0.43	10.19	4.3	5.48		Deamidation (NQ)	28646.5	5401.82	5.30312	0.00160012	30900	7190	62200	3170	13900	28500	7730	52700	32400	28500	25600	73100	0	43700	17100	16400	43900	17100	0	0	0	8320	5610	1350	20700	3590	2750	0
SFNSFHP	418.188	0.06	60	5.9	6.46			0	596.545	0	0.00159288	0	0	0	0	0	0	0	0	0	0	0	0	0	0	0	0	0	1360	0	0	0	0	1480	1480	1390	0	852	0
YYTGN(+.98)SGAEA	517.19	0.08	60	10.7	4		Deamidation (NQ)	0	877.545	0	0.00159112	0	0	0	0	0	0	0	0	0	0	0	0	0	0	0	0	0	652	761	3310	1080	1620	1820	0	0	0	410	0
PPTPPPLLLLLFPLLLFSRLCGAL	867.867	0.01	60	5.5	8.68			0	1716.91	0	0.00158807	0	0	0	0	0	0	0	0	0	0	0	0	0	0	0	0	0	5610	0	0	706	0	2420	0	3020	2780	0	4350
VEGEIAEEAAEKAT	723.85	0.11	60	7.4	3.98			13762.4	0	#DIV/0!	0.00158405	5000	3820	23800	0	40100	27700	0	14800	14200	0	6340	18900	4430	14800	4870	15800	39400	0	0	0	0	0	0	0	0	0	0	0
RAVPPNNSNAAEDDLPTVELQGVVPR	920.14	0.18	60	7.6	4.32			54805.9	0	#DIV/0!	0.00155128	213000	91400	59500	54900	0	71700	48800	99600	87500	13700	18100	24500	29000	37900	59200	0	22900	0	0	0	0	0	0	0	0	0	0	0
KVLLVRSFR	559.366	0.11	60	8	12.01			3981.71	0	#DIV/0!	0.00150751	2880	179	4090	1060	0	0	0	10300	8120	6250	0	9530	6840	5910	6500	0	6030	0	0	0	0	0	0	0	0	0	0	0
RGSCAEGM(+15.99)EGN(+.98)GTCSCQEGFGGTACET	665.486	0.15	60	7.3	4.09		Oxidation (M); Deamidation (NQ)	3344.53	0	#DIV/0!	0.00149275	0	1940	0	7360	0	3890	4610	0	2540	2820	547	4060	3310	9030	970	8530	7250	0	0	0	0	0	0	0	0	0	0	0
HPGMPGGM(+15.99)GT	957.409	0.12	60	9.6	6.74		Oxidation (M)	0	685.455	0	0.00148782	0	0	0	0	0	0	0	0	0	0	0	0	0	0	0	0	0	1210	0	0	1790	1280	1540	1720	0	0	0	0
Q(+.98)ELLGPSPQRDPQAV	818.421	0.02	60	1.8	4.37		Deamidation (NQ)	0	5420	0	0.00148044	0	0	0	0	0	0	0	0	0	0	0	0	0	0	0	0	0	11500	0	11500	4590	0	2800	0	19400	0	7040	2790
KVKAA	516.368	0.24	10.4	6.9	10			7120	733.545	9.70628	0.0014553	0	0	0	2030	9810	18400	6720	12500	10900	4500	8690	9160	0	8150	1580	15500	13100	681	928	555	728	872	817	766	1280	884	558	0
E(-18.01)NILSLERLRQAVTVKEALST	784.775	0.04	60	8	6.33		Pyro-glu from E	2936.47	10681.8	0.274904	0.00144188	0	16100	0	0	8590	0	11800	0	0	2860	0	0	0	0	4520	6050	0	0	17300	12700	10100	8560	11800	0	20700	9900	17300	9140
APVVILP	708.47	0.43	60	4.5	5.57			4961.76	0	#DIV/0!	0.00144149	0	0	7550	0	11900	13900	0	4830	3560	3140	1840	5160	4680	7190	0	11200	9400	0	0	0	0	0	0	0	0	0	0	0
ALTDMPQMR	531.766	0.03	60	11.5	5.88	sp|P02671|FIBA_HUMAN		64.1176	4169.64	0.0153773	0.00143788	0	0	0	0	0	0	0	0	0	0	0	0	0	0	0	1090	0	2370	10900	12100	0	5860	0	9920	0	666	4050	0
PPKHPGVLK	486.817	0.2	60	4.6	10.02			1483.24	0	#DIV/0!	0.00143035	0	777	2190	1110	2950	2800	1390	1260	0	1360	1410	258	1230	1620	0	5570	1290	0	0	0	0	0	0	0	0	0	0	0
QSKDDILILTVRLAVIVAVILT	798.511	0.22	60	5.5	5.96			66304.7	0	#DIV/0!	0.00142554	153000	57700	116000	41300	92100	157000	4800	93400	127000	27900	3980	41700	0	5950	22600	178000	4750	0	0	0	0	0	0	0	0	0	0	0
EEKLDQKEDGSKYETIHLTEEPTKLM(+15.99)HN(+.98)ASDSEVDQ(+.98)DDVVEWKDGASP	1098.9	0.21	60	4.4	4.22		Oxidation (M); Deamidation (NQ)	0	11545.5	0	0.00142503	0	0	0	0	0	0	0	0	0	0	0	0	0	0	0	0	0	31100	2790	1950	0	4500	7660	4090	28300	36800	3130	6680
Q(-17.03)VANPNSAIFGGARPREEVVQKEQE	912.792	0.19	60	8.4	4.95		Pyro-glu from Q	2584.71	0	#DIV/0!	0.00141912	0	0	5930	0	0	3260	0	4900	4240	2840	1220	6380	2040	3030	0	4000	6100	0	0	0	0	0	0	0	0	0	0	0
QLKAKGTT	846.509	0.05	5.89	7.7	10			235.359	2960.18	0.0795082	0.00140043	0	0	0	1900	241	0	0	0	0	72.1	948	213	0	0	0	627	0	2260	6050	0	6650	7310	7100	1390	952	0	106	744
SGEGDFLAEGGGVRGPR	554.272	0.1	60	5.3	4.68	sp|P02671|FIBA_HUMAN		0	7232.73	0	0.00137314	0	0	0	0	0	0	0	0	0	0	0	0	0	0	0	0	0	11400	2030	0	0	5090	13400	0	22100	21100	2220	2220
S(+42.01)DKPDMAEIEKFDKSKLKKTETQEKNPLPSKETIEQEKQAGES	1241.13	0.36	60	8.1	5.02	sp|P62328|TYB4_HUMAN	Acetylation (Protein N-term)	21836.5	0	#DIV/0!	0.00136406	35200	7820	48600	1500	15000	26700	2960	40700	36600	20800	0	72900	5040	0	12400	21900	23100	0	0	0	0	0	0	0	0	0	0	0
HTVVL	568.33	0.04	60	5.9	6.74			0	6281.82	0	0.0013632	0	0	0	0	0	0	0	0	0	0	0	0	0	0	0	0	0	0	15400	15100	0	0	0	11700	0	0	12200	14700
AVSAADSANGSVGAATAPAGLP	618.972	0.01	60	3.8	3.8			20.9412	1166	0.0179598	0.00133728	0	0	0	0	0	0	0	0	0	356	0	0	0	0	0	0	0	1980	0	1500	1930	0	0	2600	3860	0	0	956
CCSDWQRHFDVALGRMVYVNKMTGLSTFIAPTEDI	801.582	0.09	60	4.6	5.43			14935.3	0	#DIV/0!	0.00129297	41800	17900	10400	21500	0	0	11900	26100	10500	13800	13300	26200	17700	0	42800	0	0	0	0	0	0	0	0	0	0	0	0	0
LQTLATEAPGLIPGFTPGL	632.681	0.15	60	2	4			0	19720.9	0	0.00127614	0	0	0	0	0	0	0	0	0	0	0	0	0	0	0	0	0	0	21000	30600	0	0	23300	60900	59300	4930	0	16900
LGRRDLLPTVRIVAGVAAATTTLLM(+15.99)VITGVAL	820.244	0.03	4.39	8.3	11.7		Oxidation (M)	74.2353	813.636	0.0912389	0.00127273	0	0	0	0	0	1020	0	0	0	0	0	0	0	0	0	242	0	0	2260	0	772	0	1150	0	1930	678	1020	1140
KKKAAK	673.466	0.27	60	4.7	10.48			3348.82	0	#DIV/0!	0.00124446	2210	9770	3170	0	2450	4790	0	8390	6430	0	6770	2980	2990	0	3650	3330	0	0	0	0	0	0	0	0	0	0	0	0
TMLDNFPT	469.716	0.03	60	5.3	3.8			0	2664.18	0	0.0012442	0	0	0	0	0	0	0	0	0	0	0	0	0	0	0	0	0	2790	5230	9470	0	492	1240	814	0	3680	5590	0
LTGQVPTPVVKQ(+.98)TKLKQ	622.712	0.02	60	6	10.3		Deamidation (NQ)	1009.41	16027.3	0.0629809	0.00123728	0	0	0	4370	0	0	0	0	0	0	1890	0	0	0	10900	0	0	0	0	38700	0	12000	0	39900	29100	27400	0	29200
QASSSAASN(+.98)N(+.98)HQVGSGN(+.98)DPWSAWSASKS	706.04	0.29	11.46	5.4	6.74		Deamidation (NQ)	14420.6	179.091	80.5211	0.00121455	40700	11700	3910	19700	19000	8930	0	1850	0	3590	3500	10500	20100	33300	7470	31800	29100	1970	0	0	0	0	0	0	0	0	0	0
LFGKP	561.328	0.06	60	5.6	8.75			0	11148.2	0	0.00120937	0	0	0	0	0	0	0	0	0	0	0	0	0	0	0	0	0	0	0	16300	6690	21800	20600	40300	0	0	4940	12000
R(+42.01)GTPLLLLLLLLLLWPVPGAG	756.466	0.02	5.16	10	9.75		Acetylation (Protein N-term)	62.6476	1683.36	0.0372158	0.00118445	0	0	0	0	0	0	0	0	0	0	0	0	0	0	0	1060	5.01	2650	0	2740	4140	0	207	1740	0	5320	819	901
SSPTAAGTPNKETAGLKVGVSS	687.024	0.13	6.11	7.4	8.31			4282.18	340.909	12.5611	0.0011785	0	0	7580	817	6800	4720	1470	3950	2430	3350	4280	13400	2360	3830	3680	4920	9210	0	0	0	0	0	0	0	0	0	3750	0
THRIHWESASLLR	402.221	0.26	60	3.5	9.32	sp|P01024|CO3_HUMAN		3812.35	0	#DIV/0!	0.00114133	0	3180	3030	0	12000	0	5730	3300	0	4650	9430	4510	3460	0	3900	4510	7110	0	0	0	0	0	0	0	0	0	0	0
Q(-17.03)EAGGFFEDA	1053.41	0.05	60	12.8	3.57		Pyro-glu from Q	1277.29	0	#DIV/0!	0.00107601	1490	0	0	527	539	0	1270	0	3100	1040	934	974	1410	2700	3180	3280	1270	0	0	0	0	0	0	0	0	0	0	0
KVKAG	502.339	0.02	60	4.6	10			5.88235	197.309	0.0298129	0.00105788	0	0	0	0	0	0	0	0	100	0	0	0	0	0	0	0	0	413	151	0	89.1	705	212	299	225	0	63.3	13
ADSGEGDFLAEGGGVR	768.849	0.23	7.96	7.2	3.92	sp|P02671|FIBA_HUMAN		529300	86827.3	6.09601	0.00103936	1190000	166000	132000	936000	422000	260000	770000	53100	78000	230000	175000	857000	287000	575000	717000	1120000	1030000	66400	84500	79600	106000	142000	80800	51900	153000	88400	61500	41000
TLLPPALRALR	610.895	0.09	60	5.2	12	sp|A6NKX4|S22AV_HUMAN		1295.29	0	#DIV/0!	0.00102589	2550	3430	0	1450	2230	0	0	1010	0	1060	1460	2630	1790	0	1770	2640	0	0	0	0	0	0	0	0	0	0	0	0
PRLGTPQ(+.98)RSGAA	606.337	0.11	60	5.3	12		Deamidation (NQ)	3140	0	#DIV/0!	0.00102356	3820	7460	0	4250	2970	6100	4340	1560	4850	0	0	6220	0	0	4280	0	7530	0	0	0	0	0	0	0	0	0	0	0
HSLLLPAEVPVQRLLLSAFSAQGLVPGGGV	1009.27	0.06	60	7.5	6.75			2320	0	#DIV/0!	0.00100783	5100	1470	0	0	0	0	3740	3230	5040	1350	1130	3490	5270	1030	4860	3730	0	0	0	0	0	0	0	0	0	0	0	0
SSGGGSGGGYGN(+.98)Q(+.98)DQS	708.751	0.15	60	5.8	3.8		Deamidation (NQ)	2142.94	0	#DIV/0!	0.00100645	5240	0	3190	1210	0	0	0	4970	3310	2620	1760	2470	2850	0	1060	5620	2130	0	0	0	0	0	0	0	0	0	0	0
FAGLI	520.331	0.31	8.3	2.7	5.52			4941.18	28001.8	0.176459	0.000996245	0	20900	0	0	0	48900	0	0	0	0	0	0	0	0	0	0	14200	22900	54500	36100	37700	35600	34600	60600	0	9020	0	17000
VTGLASLLLLAGAQYLPGWTVLFLSVLGLLA	793.233	0.01	60	10.3	5.49	sp|A6NKX4|S22AV_HUMAN		0	672.2	0	0.000975294	0	0	0	0	0	0	0	0	0	0	0	0	0	0	0	0	0	360	61.2	0	0	2030	758	1540	1690	0	741	214
FLAIAKS	749.452	0.12	3.95	6	8.75			3262.88	13199.1	0.247205	0.000944898	0	0	0	499	21000	0	0	15300	0	0	0	5730	0	5080	5730	2130	0	18400	15800	13400	7320	4140	32400	9810	12000	2920	13600	15400
TQSLPP	642.345	0.14	60	6.1	5.19			0	2277.27	0	0.000911408	0	0	0	0	0	0	0	0	0	0	0	0	0	0	0	0	0	0	2580	0	8500	4000	2530	1500	2710	0	3230	0
HVPIQ(+.98)SKVVN(+.98)IPVRIPVSRPVLTLRSPGAQAAVG	890.272	0.04	2.63	9	12.3		Deamidation (NQ)	729.294	3303.09	0.220791	0.000910678	0	4900	508	2000	0	0	3250	0	0	0	0	0	0	0	0	0	1740	3590	4680	0	7930	934	4450	5310	2410	1950	2190	2890
FLVKRTKRTGGLYRVR	650.734	0.17	5.27	4.4	12.01			33841.8	85827.3	0.394301	0.000906269	13200	0	71000	42700	104000	84900	0	65800	75100	0	0	5010	0	0	0	43900	69700	115000	81000	108000	101000	54000	65200	62400	20000	90500	136000	111000
RQCISGN(+.98)CDDMDSPQ	557.196	0.21	60	9.8	3.93	sp|Q8NET8|TRPV3_HUMAN	Deamidation (NQ)	129076	0	#DIV/0!	0.000874927	241000	37100	12800	281000	0	0	251000	282000	81700	113000	114000	103000	104000	357000	141000	75700	0	0	0	0	0	0	0	0	0	0	0	0
KVGPP	497.299	0.01	60	5.1	8.75	sp|P25067|CO8A2_HUMAN		16	140.764	0.113666	0.000862452	0	0	0	0	272	0	0	0	0	0	0	0	0	0	0	0	0	311	209	0	117	174	201	76.9	287	0	161	11.5
A(+42.01)AREELYSKVTPR	521.285	0.05	60	6.9	8.63		Acetylation (Protein N-term)	2162.35	0	#DIV/0!	0.000857284	0	2800	2340	0	2740	2750	0	980	2780	2400	0	7200	3580	0	2320	3080	3790	0	0	0	0	0	0	0	0	0	0	0
NATVARRLVARALGLQHKKKERPAVRG	999.264	0.41	13.86	5.3	12.18	sp|Q9Y3T6|R3HC1_HUMAN		29025.1	173.636	167.16	0.000854104	36700	3380	54900	9890	62800	78900	14800	31600	29200	10500	5030	38600	26900	3820	13100	72500	806	0	0	0	0	650	0	0	0	0	0	1260
Q(-17.03)SLQEETVRKGP	677.851	0.02	60	5	6.14		Pyro-glu from Q	131.765	2891.27	0.0455733	0.000844664	0	0	0	0	0	0	0	0	0	0	0	0	0	0	0	2240	0	1720	1710	3660	3640	1850	0	11000	4030	634	1440	2120
Q(-17.03)GVNDNEEG	472.682	0.21	60	8.3	3.57	sp|P02675|FIBB_HUMAN	Pyro-glu from Q	7912.94	0	#DIV/0!	0.000811975	11800	2590	18700	5190	15900	27300	0	5000	6950	3410	3650	4680	3510	6660	5780	5770	7630	0	0	0	0	0	0	0	0	0	0	0
Q(-17.03)YKLNQQKRHRETRSRKPGQRRK	741.187	0.01	5.35	13.7	12.01		Pyro-glu from Q	16.8235	2038.18	0.00825418	0.000804739	0	0	0	0	0	0	0	0	0	0	0	0	0	286	0	0	0	0	0	3800	6350	2600	2730	1000	1050	0	0	4890
RHGIRRKLIK	638.91	0.2	60	7.2	12.31			2389.41	0	#DIV/0!	0.000793046	2240	8260	2290	0	1750	4140	1330	0	4160	0	2970	1750	2690	0	2270	4050	2720	0	0	0	0	0	0	0	0	0	0	0
GGGAYG	481.206	0.04	60	4.7	5.52			0	680.364	0	0.000788728	0	0	0	0	0	0	0	0	0	0	0	0	0	0	0	0	0	0	2030	534	920	1550	1280	1170	0	0	0	0
V(+42.01)AVLGGR	713.431	0.07	5.93	9.8	9.72		Acetylation (Protein N-term)	552.741	8228.67	0.0671726	0.000786004	613	1020	0	0	3450	2830	0	0	0	0	0	0	0	33.6	0	0	1450	19700	6080	8880	27300	2950	2710	10400	1510	5550	5350	85.4
GPDN(+.98)HTCQIQ(+.98)SYCAKH	601.918	0.01	60	1.4	6.9		Deamidation (NQ)	0	1935.45	0	0.00078389	0	0	0	0	0	0	0	0	0	0	0	0	0	0	0	0	0	0	0	3980	2520	0	3040	4440	5700	0	0	1610
CLVLLHEL	470.283	0.1	60	6.2	5.24			0	8367.27	0	0.000781046	0	0	0	0	0	0	0	0	0	0	0	0	0	0	0	0	0	15800	24900	20700	13000	10900	0	4440	0	2300	0	0
PGSQ(+.98)GAPGLQ(+.98)GM(+15.99)PGERGAAGLPGP	726.351	0.02	5.22	7.3	6.43		Deamidation (NQ); Oxidation (M)	54.0588	1220.91	0.0442775	0.000773365	0	0	919	0	0	0	0	0	0	0	0	0	0	0	0	0	0	0	2150	2030	2300	0	0	3400	0	0	1890	1660
TLIRKVFN	495.808	0.09	60	5.5	11			1760.59	0	#DIV/0!	0.00076962	2710	0	2380	0	3570	4090	0	2230	0	2090	4420	2550	0	1630	1800	2460	0	0	0	0	0	0	0	0	0	0	0	0
VRALIKKY	495.823	0.09	60	7.8	10.29			1622.35	0	#DIV/0!	0.000760654	3430	3040	2840	1370	2470	0	0	0	0	2100	3530	3500	0	1180	1800	0	2320	0	0	0	0	0	0	0	0	0	0	0
TLRKVSKK	480.324	0.19	60	5.9	11.26			1930	0	#DIV/0!	0.000748755	0	0	5450	0	3480	3850	1950	2710	3180	0	2350	2520	2620	2370	2330	0	0	0	0	0	0	0	0	0	0	0	0	0
PPASPALPLQ(+.98)AVKLPHPPGAPLA	747.424	0.01	3.96	5.4	9.18		Deamidation (NQ)	1011.76	9327.27	0.108474	0.000728256	0	0	0	0	0	0	14900	0	0	2300	0	0	0	0	0	0	0	22900	0	13900	8080	3720	3130	3670	15000	0	17200	15000
GIPGQ(+.98)PGLPGPPGPPGP	746.874	0.09	60	6.1	5.52		Deamidation (NQ)	825.294	3764.55	0.219228	0.000723322	0	0	2200	0	0	4940	0	0	0	0	0	0	0	0	0	0	6890	3930	5190	3570	5610	3090	3610	3140	4800	1500	6970	0
KDGPLGETVLECYN(+.98)CGCRNVFLLG	867.732	0.08	60	2.7	4.68		Deamidation (NQ)	0	2369.09	0	0.000721875	0	0	0	0	0	0	0	0	0	0	0	0	0	0	0	0	0	0	3510	7300	3970	0	4910	0	0	0	2110	4260
DITGGSEER	482.22	0.07	60	11.6	4.14			0	6949.09	0	0.000718701	0	0	0	0	0	0	0	0	0	0	0	0	0	0	0	0	0	2440	15700	5090	2350	19600	3880	19700	0	0	4470	3210
KKVKK	630.455	0.08	60	3.8	10.48	sp|Q96P44|COLA1_HUMAN		13.1176	177.845	0.0737587	0.000709457	0	0	0	0	0	0	0	0	0	0	223	0	0	0	0	0	0	0	329	336	249	206	518	99.2	0	93.5	76.3	49.3
ILPKK	598.427	0.01	60	6.8	10			8.41176	587.364	0.0143212	0.000688332	0	143	0	0	0	0	0	0	0	0	0	0	0	0	0	0	0	953	0	1200	0	908	0	1260	1640	0	500	0
Q(-17.03)NGAGEDNQQENKPS	799.826	0.14	60	6	4.14		Pyro-glu from Q	13464.1	0	#DIV/0!	0.000686804	32400	4000	0	16200	0	0	15400	6920	0	10700	6570	23400	17800	23000	15900	37900	18700	0	0	0	0	0	0	0	0	0	0	0
LPGIIKGV	796.522	0.35	60	5.7	8.75			2422.35	0	#DIV/0!	0.000678976	0	0	1260	0	4960	6930	1690	2900	1700	1810	2290	2740	2790	2030	0	5800	4280	0	0	0	0	0	0	0	0	0	0	0
KIFVLI	732.502	0.15	60	5.9	8.75			2093.24	0	#DIV/0!	0.000673376	3150	0	0	3010	3480	3000	736	4680	1940	2650	5530	504	664	577	524	4460	680	0	0	0	0	0	0	0	0	0	0	0
E(-18.01)GKSQ(+.98)PAGEGSRVV	692.358	0.12	4.53	7.5	6.24		Pyro-glu from E; Deamidation (NQ)	3167.06	15871.8	0.19954	0.000648184	0	0	2710	0	0	19100	0	6380	6580	0	2570	0	10400	0	0	0	6100	0	16300	16100	18800	0	23200	4190	26000	40200	18800	11000
SLDRNLPSDSQDLGQHGLEED	775.69	0.14	60	4.8	3.96			29302.4	0	#DIV/0!	0.000628145	0	1930	50200	8510	24900	84400	7390	55400	34600	16700	10600	23100	18200	37200	5910	64000	55100	0	0	0	0	0	0	0	0	0	0	0
PPPPLLRLPLPPP	702.431	0.02	5.44	5.1	10.18			108.824	1721.82	0.0632027	0.000623231	0	0	0	0	0	0	0	0	0	0	0	0	1850	0	0	0	0	1090	0	0	0	1120	1430	1270	4900	3990	2490	2650
E(-18.01)PPKTPV	375.214	0.09	60	5.7	6.1		Pyro-glu from E	0	5316.36	0	0.000622938	0	0	0	0	0	0	0	0	0	0	0	0	0	0	0	0	0	6280	7470	14300	6230	0	0	13500	0	0	10700	0
SSSYSKQFTSSTSYNRGDSTFESKSY	733.576	0.29	60	6.3	8.1	sp|P02671|FIBA_HUMAN		533588	0	#DIV/0!	0.000614916	1920000	247000	118000	926000	240000	124000	741000	106000	329000	520000	184000	629000	519000	493000	327000	1000000	648000	0	0	0	0	0	0	0	0	0	0	0
TIVPR	585.378	0.28	10.01	5	9.41			2657.65	183.545	14.4795	0.000604992	2880	0	3100	1180	2310	3090	6350	2620	8150	2370	0	2940	0	1970	3320	2450	2450	190	0	0	0	0	0	0	0	786	780	263
QAGGQCVDEDSSHY	499.197	0.11	60	2.3	4.02			0	2879.09	0	0.000585193	0	0	0	0	0	0	0	0	0	0	0	0	0	0	0	0	0	0	7350	0	0	2030	4240	4140	8910	0	2510	2490
GLQ(+.98)GLPGSTGDR	1158.54	0.1	60	3.2	5.84		Deamidation (NQ)	0	1492.55	0	0.000572224	0	0	0	0	0	0	0	0	0	0	0	0	0	0	0	0	0	0	0	3370	2450	0	3100	3680	0	0	948	2870
TSLVKFV	793.509	0.21	8.6	6.5	8.41			2957.06	28.8182	102.611	0.000561149	0	1180	4850	0	5490	9120	0	3130	2220	2050	2220	3900	2810	3880	0	5130	4290	0	0	0	0	0	0	317	0	0	0	0
HSKVN	584.33	0.18	60	3.6	8.76			462.824	0	#DIV/0!	0.000555379	0	847	0	886	0	0	843	1060	500	354	655	491	712	740	0	780	0	0	0	0	0	0	0	0	0	0	0	0
LLDILLLLPLLIVCSLESFVKLFIPKRR	817	0.22	60	6.1	9.31			69858.8	0	#DIV/0!	0.000542332	125000	30300	0	91400	0	0	197000	102000	181000	30500	60500	32200	58700	32700	71500	93200	81600	0	0	0	0	0	0	0	0	0	0	0
GMPGLKGQ(+.98)PGLPGPSGQ(+.98)PGLYGPPGLHGFPGAPGQ(+.98)EGPLGLPGI	823.622	0.03	60	12.9	6.75		Deamidation (NQ)	0	3992.73	0	0.000527216	0	0	0	0	0	0	0	0	0	0	0	0	0	0	0	0	0	0	0	8050	6540	0	8010	9930	8630	0	2760	0
KTVVLLADKK	557.862	0.15	60	4.2	9.7			1975.88	0	#DIV/0!	0.000523622	4350	1390	2780	0	3270	3630	0	0	0	2870	3330	4140	0	0	2890	2790	2150	0	0	0	0	0	0	0	0	0	0	0
TATSEYQTFFNPR	521.247	0.3	60	3.9	5.66			18855.3	0	#DIV/0!	0.000519881	21700	8640	6580	55900	0	0	23100	14700	10000	19300	9900	47400	5620	33600	30800	12300	21000	0	0	0	0	0	0	0	0	0	0	0
LVGGVPVT	741.45	0.01	60	7.6	5.52			69.6471	6156.64	0.0113125	0.000517835	778	0	0	0	0	0	0	0	0	0	0	406	0	0	0	0	0	7420	0	11500	4190	5900	448	4470	15800	0	17800	195
SSYSKQFTSSTSYNRGDSTFESKSY	948.755	0.28	60	4.6	8.1	sp|P02671|FIBA_HUMAN		21078.2	0	#DIV/0!	0.000507533	46400	0	7120	33200	18400	5840	12500	5930	19400	21200	3540	25300	29500	15600	10300	67300	36800	0	0	0	0	0	0	0	0	0	0	0
VFIQ(+.98)NGYPCQNN	466.533	0.09	60	3.9	5.49		Deamidation (NQ)	0	2217.27	0	0.000505949	0	0	0	0	0	0	0	0	0	0	0	0	0	0	0	0	0	0	2150	4070	5750	0	0	4070	5310	0	3040	0
KKIAIRNVS	514.831	0.14	60	9.1	11.17			1814.53	0	#DIV/0!	0.000503107	0	2250	2290	1960	0	0	0	2050	2840	867	2150	1430	3880	3290	0	4860	2980	0	0	0	0	0	0	0	0	0	0	0
HSTSVSMSRLSLPSKNGSKKKGLKPKELFKKAERKGKESSALG	929.136	0.01	60	7.8	10.58			219.412	2170.45	0.10109	0.000497427	3730	0	0	0	0	0	0	0	0	0	0	0	0	0	0	0	0	1930	1180	0	675	1590	3970	3760	3390	2310	5070	0
KLFAKGN	777.48	0.2	60	5	10			3563.53	0	#DIV/0!	0.000484768	4540	0	9920	0	7540	0	3380	0	5860	4290	4840	4520	4510	1780	3460	5940	0	0	0	0	0	0	0	0	0	0	0	0
E(-18.01)KLKQCKSEFPIRTLKTLLHTLCKLKG	785.226	0.1	5.39	7.2	9.79		Pyro-glu from E	602.059	2209	0.272548	0.000484678	0	2210	0	396	0	2250	1300	1320	0	0	543	0	0	0	460	386	1370	2080	1370	0	1900	3260	3950	1000	3270	4080	2660	729
VQPQPQPKPQVQLHVQSQT	723.057	0.21	60	5.8	8.73	sp|Q15942|ZYX_HUMAN		2758.24	0	#DIV/0!	0.000483877	0	0	4740	0	2800	3140	0	3090	2680	2800	2040	8270	1720	3790	2560	2580	6680	0	0	0	0	0	0	0	0	0	0	0
Q(-17.03)GMM(+15.99)AAMLSHAYGPGG	789.328	0.05	60	6.3	6.74		Pyro-glu from Q; Oxidation (M)	525.765	6202.36	0.0847684	0.00047373	0	0	0	0	6860	1450	0	0	0	0	0	0	0	0	628	0	0	796	0	6900	14700	8250	0	15500	10400	2570	4580	4530
EEDALSLGAEACN(+.98)FM(+15.99)	808.827	0.15	60	6	3.5		Deamidation (NQ); Oxidation (M)	8760.59	0	#DIV/0!	0.000461319	8930	3670	0	9290	0	0	12800	0	0	12000	19900	15600	8400	11300	8940	20600	17500	0	0	0	0	0	0	0	0	0	0	0
SSSYSKQFTSSTSYNRGDSTFESKS	692.812	0.18	6.66	6.3	8.16	sp|P02671|FIBA_HUMAN		215605	5367.27	40.1704	0.000455434	555000	118000	23600	225000	318000	92400	201000	8890	38800	122000	39400	310000	224000	366000	95200	518000	410000	25300	0	0	0	4430	1530	0	13500	7230	5740	1310
LVEGEIAEEAAEKAT	780.391	0.16	60	6.2	3.98			19588.2	0	#DIV/0!	0.000451414	0	3690	23600	0	27700	33600	0	17900	27300	14600	18300	37800	15800	15900	4910	31800	60100	0	0	0	0	0	0	0	0	0	0	0
VVKAFSA	721.435	0.01	60	7.8	8.72	sp|O95714|HERC2_HUMAN		0	5197.27	0	0.000431681	0	0	0	0	0	0	0	0	0	0	0	0	0	0	0	0	0	14100	4370	15700	4750	2060	0	0	0	4470	7590	4130
GELKGGDGGGSAGGGAGGGSGGGAGSPPQ	553.989	0.08	60	4.8	4.37			268.235	3691.82	0.0726567	0.000431445	0	0	0	0	0	0	0	0	0	0	0	0	0	0	0	1870	2690	0	4140	3480	6750	0	6230	0	7890	3200	8920	0
HHRLLQRSLVLFSVGVVLALVLNLL	703.186	0.03	5.64	7.1	12			317.647	2720.91	0.116743	0.000428449	0	1700	0	0	0	390	0	0	1190	0	0	2120	0	0	0	0	0	3730	0	0	2650	2820	1350	6810	0	2700	3760	6110
LPPLQK	695.446	0.15	60	5.9	8.75			1384.71	0	#DIV/0!	0.000401904	0	0	2020	0	1790	2310	0	1670	0	0	2670	1770	2110	2380	1730	1810	3280	0	0	0	0	0	0	0	0	0	0	0
FVCGDCGQ(+.98)	415.14	0.07	60	4.9	3.8		Deamidation (NQ)	0	581.364	0	0.000398303	0	0	0	0	0	0	0	0	0	0	0	0	0	0	0	0	0	0	931	837	1170	697	0	1230	1530	0	0	0
GFFGEHCQNAFCH	499.531	0.07	60	3.2	5.98			0	748	0	0.000377275	0	0	0	0	0	0	0	0	0	0	0	0	0	0	0	0	0	0	1350	0	1620	1200	0	1920	1320	0	0	818
HVPLAAL	720.446	0.01	60	7.9	6.74			16.4706	1300.27	0.012667	0.000375472	0	0	0	0	0	0	280	0	0	0	0	0	0	0	0	0	0	2090	0	741	979	1510	3850	3400	0	887	413	433
SGEGDFLAEGGGV	597.766	0.49	60	2.8	3.57	sp|P02671|FIBA_HUMAN		242471	0	#DIV/0!	0.000374886	784000	78200	111000	259000	90200	136000	230000	64000	80200	318000	137000	536000	198000	423000	364000	241000	72400	0	0	0	0	0	0	0	0	0	0	0
LKKFQVT	863.535	0.01	60	5.2	10			0	245.327	0	0.000365717	0	0	0	0	0	0	0	0	0	0	0	0	0	0	0	0	0	447	0	0	338	712	499	393	0	236	0	73.6
KTKPGV	629.404	0.29	60	4.3	10			3770.59	0	#DIV/0!	0.000361544	3680	9430	2920	2050	11200	0	1500	3100	2630	1940	3400	2560	2020	2400	8310	4940	2020	0	0	0	0	0	0	0	0	0	0	0
YEGSYALTSEEAERSDGDPVQPAVLQVHQTS	1121.86	0.12	60	8	4.08			14097.1	0	#DIV/0!	0.000361286	21400	14600	14200	0	0	11300	0	23500	45800	19500	16800	24000	7170	9120	12000	4660	15600	0	0	0	0	0	0	0	0	0	0	0
HGLPT	524.284	0.11	60	1	6.74			0	15045.5	0	0.000359446	0	0	0	0	0	0	0	0	0	0	0	0	0	0	0	0	0	28700	9370	6060	21500	4670	0	47500	24700	0	0	23000
LKKALLLQ(+.98)GSN	593.377	0.15	7.27	5.3	10		Deamidation (NQ)	5412.94	261.727	20.6816	0.000357832	13100	8590	0	0	10100	12100	5650	3250	2760	5340	4770	2190	5390	2540	7170	0	9070	0	0	0	0	0	0	0	0	1540	992	347
CGLRVAV	359.213	0.09	60	3	8.25			0	2386.36	0	0.000355015	0	0	0	0	0	0	0	0	0	0	0	0	0	0	0	0	0	3660	0	5930	3090	0	0	5560	4330	0	3680	0
GPRGT	487.266	0.22	7.84	4.5	9.75			16.6471	1539.87	0.0108107	0.000350236	0	0	0	0	0	0	0	0	0	0	283	0	0	0	0	0	0	88.6	2470	2860	3600	0	2180	3700	0	2040	0	0
AAPGQEPPEHMAELQR	587.617	0.13	60	2.6	4.75			0	12604.5	0	0.000319965	0	0	0	0	0	0	0	0	0	0	0	0	0	0	0	0	0	31000	3200	3100	4660	10800	12200	7810	43000	7250	7310	8320
MVLKIIAFKPK	644.409	0.12	60	4.2	10.3			1887.41	0	#DIV/0!	0.000307698	1730	2970	1590	2260	0	4640	0	0	906	1250	2570	1710	0	3820	1280	3460	3900	0	0	0	0	0	0	0	0	0	0	0
ALTSEEAERSDGDPVQPAVLQVHQTS	922.113	0.12	6.59	5.6	4.17			27227.6	320	85.0864	0.000307592	10300	3670	45700	1300	47600	55300	2700	17800	38600	14100	10100	51700	14400	34900	11100	34200	69400	0	0	0	0	0	0	0	0	3520	0	0
PGEGSKASSFN(+.98)ESGSQCF	607.248	0.04	60	8.3	4.53		Deamidation (NQ)	0	1636.36	0	0.000296057	0	0	0	0	0	0	0	0	0	0	0	0	0	0	0	0	0	0	0	2090	3250	0	4060	2840	0	0	2700	3060
QPLGGHKGTGYQ(+.98)AGGLGSPYLR	739.046	0.01	60	2.2	9.7		Deamidation (NQ)	0	1260	0	0.000291889	0	0	0	0	0	0	0	0	0	0	0	0	0	0	0	0	0	0	0	2000	1630	1720	1620	4130	0	0	1640	1120
YGCEECG	380.617	0.12	60	3.5	3.79			0	3063.64	0	0.000291088	0	0	0	0	0	0	0	0	0	0	0	0	0	0	0	0	0	2440	3020	0	6320	6970	0	7970	0	0	1910	5070
DFLAEGGGV	864.408	0.27	60	5.5	3.67	sp|P02671|FIBA_HUMAN		153447	0	#DIV/0!	0.000281822	455000	97900	42400	181000	54000	89600	147000	16200	21600	153000	57900	161000	112000	382000	183000	237000	218000	0	0	0	0	0	0	0	0	0	0	0
GFKSHALQLNNRQIR	446.253	0.14	60	1.5	12.01			0	4397.27	0	0.00027992	0	0	0	0	0	0	0	0	0	0	0	0	0	0	0	0	0	9220	0	2550	11600	0	0	8850	7200	0	6360	2590
DSTFESKSYKM	441.536	0.11	60	3.8	6.07	sp|P02671|FIBA_HUMAN		0	991.182	0	0.000278715	0	0	0	0	0	0	0	0	0	0	0	0	0	0	0	0	0	1740	0	813	0	0	2270	2070	2410	0	430	1170
HVQPQPQPKPQVQLHVQSQT	576.81	0.25	11.01	2.9	8.76	sp|Q15942|ZYX_HUMAN		21807.6	106.364	205.029	0.000273017	13600	13200	22900	3790	26000	23700	2810	29200	20800	38800	17900	76600	7420	26900	16700	20900	9510	0	0	0	0	0	0	0	0	0	1170	0
PLLFDHLAQLFF	730.893	0.02	60	6.6	5.08			422.941	10098.2	0.0418829	0.000272941	0	0	0	0	0	3090	4100	0	0	0	0	0	0	0	0	0	0	0	5410	24800	14300	14200	2760	25300	0	0	15600	8710
AVPPNNSNAAEDDLPTVELQGVVPR	868.106	0.15	60	4.2	3.92			35372.4	0	#DIV/0!	0.000264022	116000	31000	36700	27100	19000	67700	16400	72900	36900	8230	12000	16700	16600	17100	31100	47600	28300	0	0	0	0	0	0	0	0	0	0	0
PGPTGQHD	404.677	0.1	60	5	5.08			0	6122.73	0	0.000259266	0	0	0	0	0	0	0	0	0	0	0	0	0	0	0	0	0	0	4720	18400	7270	11400	10500	9730	0	0	0	5330
Q(-17.03)GVNDNEEGFFSA	698.781	0.09	6.04	6	3.57	sp|P02675|FIBB_HUMAN	Pyro-glu from Q	397286	2517.73	157.796	0.000256537	1100000	369000	37200	802000	2600	5370	593000	222000	66700	487000	332000	794000	473000	499000	476000	236000	259000	1310	671	5720	1820	2720	2230	1930	3370	514	2790	4620
FGALLGLSLYGA	591.33	0.22	60	4.7	5.52			2189.65	0	#DIV/0!	0.0002522	4220	4450	2930	0	2610	3520	0	2640	0	2250	4570	3600	0	884	0	2300	3250	0	0	0	0	0	0	0	0	0	0	0
VLEEDEEVTEEAEMEPEDKGH	815.346	0.1	60	5.4	3.8			7483.53	0	#DIV/0!	0.000238859	0	3850	3340	0	16200	12800	0	15100	13300	4400	9130	7950	6440	6780	3830	6000	18100	0	0	0	0	0	0	0	0	0	0	0
QILHPKK	863.536	0.06	4.51	7.5	10			100.741	682.091	0.147695	0.000234177	0	0	175	0	11.6	719	45.7	0	0	0	215	75.3	332	0	0	0	139	1310	0	0	705	837	1300	1460	754	500	441	196
DSGEGDFLAEGGGV	655.279	0.18	60	4.8	3.43	sp|P02671|FIBA_HUMAN		540647	0	#DIV/0!	0.000229545	1740000	837000	239000	1020000	155000	220000	892000	274000	236000	371000	446000	550000	379000	501000	884000	298000	149000	0	0	0	0	0	0	0	0	0	0	0
GNPCSHSCHN(+.98)AM(+15.99)GT	716.736	0.24	60	7.6	6.9		Deamidation (NQ); Oxidation (M)	877.706	0	#DIV/0!	0.00022748	815	662	0	1680	0	0	1490	952	0	1720	0	672	1830	1520	1170	1100	1310	0	0	0	0	0	0	0	0	0	0	0
T(+42.01)DYSTYSQ(+.98)AAAQQGYSAYTAQ(+.98)PTQG	901.379	0.15	6.98	8.4	3.8	sp|Q01844|EWS_HUMAN	Acetylation (Protein N-term); Deamidation (NQ)	4725.29	66.7273	70.815	0.00022534	9420	10400	0	3820	7260	0	4270	4600	9060	3530	4580	7880	3710	0	2710	0	9090	0	0	0	0	0	0	0	0	0	0	734
KRKKN(+.98)APP	470.289	0.12	60	6.5	11.26		Deamidation (NQ)	2580	0	#DIV/0!	0.000221777	2610	0	2820	2740	3900	7590	0	0	0	1790	2730	3680	2250	3190	1810	4250	4500	0	0	0	0	0	0	0	0	0	0	0
Q(-17.03)FTSSTSYNRGDSTFESKSYKMADEAGSEADHEGTHSTKRGHA	936.41	0.14	60	9.9	5.81	sp|P02671|FIBA_HUMAN	Pyro-glu from Q	15484.1	0	#DIV/0!	0.000220476	1010	9300	38200	11000	30800	36400	3000	18000	28900	7650	6130	7370	5570	22000	6600	19700	11600	0	0	0	0	0	0	0	0	0	0	0
KSKKKL	731.508	0.3	10.94	4.6	10.48			3316.47	132.727	24.9871	0.000214861	1480	7160	4870	961	889	2540	2340	10300	3620	1820	4250	4050	1300	3060	3400	1640	2700	0	0	0	0	0	0	0	0	1460	0	0
SVATPRN(+.98)AAENGA	629.82	0.07	60	4.1	5.72		Deamidation (NQ)	1710.59	18643.6	0.0917519	0.000211866	0	0	0	0	3190	16400	0	0	3560	0	0	0	0	0	0	0	5930	39300	28600	16500	48500	0	21000	21100	0	4740	15800	9540
S(+42.01)GGGGGSSAGAAGGGDDLGAN(+.98)DELIPF	588.008	0.01	60	7.2	3.37		Acetylation (Protein N-term); Deamidation (NQ)	0	1426.45	0	0.000206192	0	0	0	0	0	0	0	0	0	0	0	0	0	0	0	0	0	1940	2770	872	1610	0	1350	0	4730	495	574	1350
LGEDAEVAADFDM(+15.99)E	764.309	0.26	60	6.9	3.29		Oxidation (M)	3647.06	0	#DIV/0!	0.000198449	3420	0	4870	4660	0	0	0	3690	8740	5870	4000	5350	5070	7840	0	4080	4410	0	0	0	0	0	0	0	0	0	0	0
ALGGLSGPAQRLHM(+15.99)GHG	837.914	0.01	60	2.6	9.81		Oxidation (M)	0	2294.55	0	0.000193054	0	0	0	0	0	0	0	0	0	0	0	0	0	0	0	0	0	0	2110	0	4540	1770	0	4210	6240	0	2360	4010
SYALTSEEAERSDGDPVQPAVLQVHQTS	1005.48	0.08	60	6.4	4.17			7245.88	0	#DIV/0!	0.00019302	4620	2120	19300	0	10000	9460	0	4030	10400	4140	3170	15600	4690	7560	4520	8870	14700	0	0	0	0	0	0	0	0	0	0	0
DCFGDKLSDESIFS	521.564	0.08	60	4.1	3.84			0	1540.91	0	0.000192679	0	0	0	0	0	0	0	0	0	0	0	0	0	0	0	0	0	0	4730	1890	0	0	2100	2650	0	2020	1440	2120
Q(-17.03)GVNDNEEGFFSAR	776.836	0.08	4.33	4.8	4.14	sp|P02675|FIBB_HUMAN	Pyro-glu from Q	4112.94	33954.5	0.121131	0.000187974	11400	2300	0	9320	0	0	18300	0	0	3570	8470	6460	0	0	10100	0	0	72300	13300	12200	13900	19900	52300	11300	88800	52900	16500	20100
KKKKF	678.459	0.55	60	4	10.48			29967.6	0	#DIV/0!	0.000186797	0	0	52700	9330	59500	79000	16700	30700	27100	17600	18300	28800	26100	32600	5120	58200	47700	0	0	0	0	0	0	0	0	0	0	0
N(+.98)GFKSHALQLNNRQ	543.281	0.02	60	2.6	11		Deamidation (NQ)	0	933.909	0	0.000184566	0	0	0	0	0	0	0	0	0	0	0	0	0	0	0	0	0	1440	546	0	2260	0	1330	0	2070	0	1860	767
NGADAVHFRV	543.28	0.07	60	7.6	6.74			1888.24	29700	0.0635769	0.000170833	0	0	0	0	27300	0	0	0	0	0	0	0	0	0	0	4800	0	25900	15800	37400	14400	0	28100	27000	8300	75300	76700	17800
N(+.98)PGPAGQK	385.192	0.14	4.92	4.9	8.75		Deamidation (NQ)	514.118	2679.09	0.1919	0.000168938	0	0	0	0	0	3460	0	0	0	0	0	0	0	0	0	2330	2950	2360	2030	5140	2140	3190	3890	4340	2610	0	2540	1230
GFAGLLAILLV	543.851	0.11	60	8.7	5.52			4077.06	0	#DIV/0!	0.000152994	5020	3090	5720	3450	7270	11000	0	0	3040	3930	0	5030	7330	3460	4830	0	6140	0	0	0	0	0	0	0	0	0	0	0
QPICGNGM(+15.99)VEQGEECDCGYSDQ(+.98)C	827.921	0.57	37.28	4.3	3.39	sp|O14672|ADA10_HUMAN	Oxidation (M); Deamidation (NQ)	246888	23592.7	10.4646	0.000139871	362000	165000	0	0	244000	363000	88100	523000	433000	0	274000	247000	147000	399000	214000	310000	428000	46100	0	0	0	0	24300	26600	107000	48900	6620	0
GLVGLGAS	673.397	0.02	5.19	5.3	5.52			185.882	10377.3	0.0179124	0.000137013	0	0	0	0	0	0	0	0	0	3160	0	0	0	0	0	0	0	7590	19900	8690	8720	0	0	18000	22500	25100	0	3650
A(+42.01)GSVADSDAVVKLDDGHLN	962.961	0.14	60	7.5	4.13		Acetylation (Protein N-term)	13727.6	0	#DIV/0!	0.000135058	4760	7850	18800	1860	22400	0	0	24400	29300	13500	20500	27200	13400	14700	10200	0	24500	0	0	0	0	0	0	0	0	0	0	0
KKKKQRTSSK	609.89	0.15	60	8.6	11.39			2068.82	0	#DIV/0!	0.000120828	2090	0	1040	0	3260	4540	1930	2810	2910	1690	0	4340	3250	3610	1460	0	2240	0	0	0	0	0	0	0	0	0	0	0
LERSQ(+.98)SGGKPEPVVTVR	614.002	0.03	60	5.9	8.75		Deamidation (NQ)	0	1285.73	0	0.00011259	0	0	0	0	0	0	0	0	0	0	0	0	0	0	0	0	0	2130	859	0	3870	1910	1540	2010	0	664	0	1160
CHNAS	531.185	0.36	60	3.1	6.73			3360	0	#DIV/0!	0.000112347	0	2600	3900	2430	1860	3690	3650	9100	6760	1920	4150	0	2960	6360	0	4040	3700	0	0	0	0	0	0	0	0	0	0	0
FTSSTSYNRGDSTFESKSY	721.985	0.21	60	6.4	6.07	sp|P02671|FIBA_HUMAN		3626.35	0	#DIV/0!	0.000111717	8900	3280	2600	5730	5240	4960	1870	2740	1390	1700	0	3380	0	6740	838	7500	4780	0	0	0	0	0	0	0	0	0	0	0
Q(-17.03)LKLVGNFKLKEALAAKDFVNLRSLSVP	771.223	0.01	60	7.2	10		Pyro-glu from Q	59.9412	1778.18	0.0337093	0.000108019	0	0	713	0	0	0	0	0	0	0	0	0	0	0	0	306	0	3350	960	0	1640	0	4040	2150	0	1560	4260	1600
GGMRDGHYTTFACN(+.98)KDSGQ(+.98)WHY	845.02	0.36	2.97	6.6	6.91		Deamidation (NQ)	27083.5	55572.7	0.487353	0.000107355	0	45600	9600	33300	50100	18600	27800	29400	5760	34700	36900	45200	28200	5560	47800	41900	0	55300	56700	67900	71600	63400	57400	56400	62900	47500	18600	53600
NIAFFSTMC	517.221	0.04	60	6.8	5.52			0	577.273	0	0.000106101	0	0	0	0	0	0	0	0	0	0	0	0	0	0	0	0	0	678	1110	0	0	0	1060	1200	1260	690	352	0
PAAGF	462.231	0.17	60	2.8	5.96			212.412	1583.18	0.134168	0.000101376	0	0	0	0	0	1590	0	0	0	0	0	0	0	651	0	0	1370	1020	1620	2520	1880	0	2120	2990	3120	0	945	1200
NNNQQ	617.258	0.12	60	3.5	5.52	sp|Q99698|LYST_HUMAN		396.471	2457.09	0.161358	9.87792e-05	0	0	1790	0	0	3600	0	0	1350	0	0	0	0	0	0	0	0	2710	1660	4220	3140	1390	3590	4520	3290	556	1050	902
MASTSALTTG	470.219	0.06	60	6.8	5.28			1023.53	12887.3	0.0794217	9.77461e-05	0	0	0	0	17400	0	0	0	0	0	0	0	0	0	0	0	0	4200	13900	5890	11300	22200	31700	13100	2250	2620	12500	22100
YVPLLPLALWALLLLGGL	645.735	0.05	5.8	4.7	5.52			131.176	2894.45	0.0453199	9.47879e-05	0	0	0	0	0	0	0	0	0	0	2230	0	0	0	0	0	0	2620	1770	5800	441	5970	3510	368	2650	6910	0	1800
RSHGMTGAQT	523.254	0.12	60	3.2	9.76			676.471	25803.8	0.0262159	9.29981e-05	0	0	0	0	0	11500	0	0	0	0	0	0	0	0	0	0	0	442	57200	31200	27900	20500	70400	23700	0	28300	0	24200
LQ(+.98)DPDSQ(+.98)GLSPAAAA	721.837	0.01	60	3.3	3.56		Deamidation (NQ)	0	2110	0	8.7308e-05	0	0	0	0	0	0	0	0	0	0	0	0	0	0	0	0	0	1390	0	3020	4070	2860	5000	3940	0	0	0	2930
T(+42.01)EKAPEPHVEEDDDDELDSKLNY	910.732	0.41	60	6.2	3.92	sp|P52566|GDIR2_HUMAN	Acetylation (Protein N-term)	16219.4	0	#DIV/0!	8.68932e-05	7670	7390	27500	2940	10200	14500	2630	33000	0	12800	19400	34300	15000	27000	11600	13500	36300	0	0	0	0	0	0	0	0	0	0	0
ALTDLSSPGMTSGN(+.98)GNSASSIAGTAPQNGENKPPQ	840.142	0.01	60	6.5	4.37		Deamidation (NQ)	0	2209.09	0	8.58604e-05	0	0	0	0	0	0	0	0	0	0	0	0	0	0	0	0	0	2330	3300	3930	2870	0	0	5790	0	0	3730	2350
SEETKENEGFTVTAEG	864.381	0.08	60	10.6	3.98	sp|P01024|CO3_HUMAN		16931.2	0	#DIV/0!	8.43798e-05	40400	2500	36500	16600	17400	23600	4200	17700	13800	4180	4500	11800	24600	16800	6150	36500	10600	0	0	0	0	0	0	0	0	0	0	0
EAQGGA	532.231	0.16	60	4.9	4			0	2498.18	0	8.2909e-05	0	0	0	0	0	0	0	0	0	0	0	0	0	0	0	0	0	0	2780	5100	3770	0	6960	0	2630	1490	3320	1430
VGLIPAGA	697.429	0.47	29.23	4.8	5.49			15030	9.09091	1653.3	7.95558e-05	0	4450	29500	7250	27000	44600	9010	14100	11000	9300	12600	15300	10100	13000	10700	19300	18300	0	0	0	0	0	0	0	0	0	100	0
SSSYSKQFTSSTSYNRGDSTFESKSYKMADEAGSEADHEGTHST	957.811	0.15	60	7.7	5.01	sp|P02671|FIBA_HUMAN		93192.9	0	#DIV/0!	7.9417e-05	156000	81200	146000	61300	121000	195000	33100	98600	149000	3800	45700	43200	40500	118000	5280	228000	58600	0	0	0	0	0	0	0	0	0	0	0
GEGDFLAEGGGV	554.25	0.3	60	2.6	3.57	sp|P02671|FIBA_HUMAN		155388	0	#DIV/0!	7.58367e-05	453000	90700	55500	138000	45300	75900	193000	38300	62800	239000	57400	248000	167000	260000	219000	199000	99700	0	0	0	0	0	0	0	0	0	0	0
KEATLELILK	579.362	0.23	60	5.9	6.14			5460	12.8182	425.957	7.50136e-05	7940	0	9100	0	5680	9820	6340	7300	8140	7320	0	9440	8910	0	5480	0	7350	0	0	0	0	0	0	0	0	0	0	141
RGGLGEGEY	469.219	0.08	60	10	4.53			0	4694.64	0	6.80635e-05	0	0	0	0	0	0	0	0	0	0	0	0	0	0	0	0	0	3620	921	5830	0	9490	0	11500	8290	0	4890	7100
E(-18.01)EFCCEECM(+15.99)SKYT	533.851	0.54	60	5.6	4.09		Pyro-glu from E; Oxidation (M)	248294	0	#DIV/0!	6.68964e-05	582000	300000	301000	308000	0	0	279000	0	433000	259000	431000	300000	350000	0	357000	181000	140000	0	0	0	0	0	0	0	0	0	0	0
TAFGGRRAVPPNNSNAAEDDLPTVELQGVVPR	837.68	0.13	60	5.2	4.78			71876.5	0	#DIV/0!	6.48031e-05	229000	89000	56500	63300	40400	35600	71000	65500	137000	23000	42900	68300	60800	42500	114000	38600	44500	0	0	0	0	0	0	0	0	0	0	0
FIQQSLHLDLYLA	780.921	0.07	3.98	6.4	5.08			3200.59	18321.8	0.174687	6.46892e-05	0	1460	17400	0	14600	0	0	0	9550	0	0	0	0	0	0	0	11400	16200	26100	23300	22000	0	28500	25000	3790	33600	17400	5650
KVGDTVMVDGFTKPKMT	618.66	0.06	60	5.4	8.5			0	3211.82	0	6.07816e-05	0	0	0	0	0	0	0	0	0	0	0	0	0	0	0	0	0	5690	0	4650	9840	0	1720	2330	2990	1700	3670	2740
TAATGD	535.236	0.12	60	3.9	3.8			17.0588	798.364	0.0213672	5.46884e-05	0	0	0	0	0	0	0	0	0	290	0	0	0	0	0	0	0	946	872	627	937	0	0	1540	2180	984	696	0
GDSTFESKSYKMA	484.222	0.19	60	2.7	6.07	sp|P02671|FIBA_HUMAN		64.9412	3687.64	0.0176105	5.39084e-05	0	0	0	633	0	0	0	0	0	0	471	0	0	0	0	0	0	5510	0	2080	1410	1850	7160	4570	10200	874	1700	5210
IVKKGYLLK	531.357	0.25	60	4.4	10			4657.65	0	#DIV/0!	4.95588e-05	4480	7770	0	0	6680	0	3160	8580	3760	3550	6980	6630	6760	0	5090	9480	6260	0	0	0	0	0	0	0	0	0	0	0
GTFSA	482.226	0.12	60	2.4	5.52			0	743.182	0	4.94439e-05	0	0	0	0	0	0	0	0	0	0	0	0	0	0	0	0	0	543	2070	778	945	997	1310	462	1070	0	0	0
PGMESRHRSPSGAGEGASCSDGP	743.648	0.05	60	3.9	5.45			1148.24	9386.36	0.12233	4.89554e-05	0	0	1220	0	18300	0	0	0	0	0	0	0	0	0	0	0	0	4530	11800	10300	11200	6530	10400	18500	13000	4120	7300	5570
GIYTKVS	767.431	0.07	60	3.3	8.59			0	26045.5	0	4.56636e-05	0	0	0	0	0	0	0	0	0	0	0	0	0	0	0	0	0	37000	26800	0	0	42400	46700	48900	55700	0	29000	0
Q(-17.03)FTSSTSYNRGDSTFESKSYKMADEAGSEADHEGTHSTKRGHAKSRPV	1049.88	0.13	60	3.5	7.03	sp|P02671|FIBA_HUMAN	Pyro-glu from Q	7139.41	0	#DIV/0!	4.55668e-05	11600	4400	14400	0	13100	9800	0	12500	12300	7270	4720	7510	3390	10400	4920	5060	0	0	0	0	0	0	0	0	0	0	0	0
SIWLIVFGVVMGVIVVGIVILIFT	647.652	0.03	60	4.9	5.24			0	2413.64	0	4.22905e-05	0	0	0	0	0	0	0	0	0	0	0	0	0	0	0	0	0	0	0	2850	6190	0	1940	1800	1990	4510	4590	2680
Q(-17.03)GVNDNEEGFF	1238.49	0.18	60	5.5	3.57	sp|P02675|FIBB_HUMAN	Pyro-glu from Q	206747	0	#DIV/0!	4.11595e-05	290000	31500	180000	116000	289000	92200	183000	120000	180000	100000	118000	273000	173000	277000	220000	655000	217000	0	0	0	0	0	0	0	0	0	0	0
A(+42.01)EGKAGGAAGLFA	581.288	0.19	60	7.1	6.05		Acetylation (Protein N-term)	2478.24	25074.5	0.0988347	3.90259e-05	0	0	6590	0	2280	8050	0	0	0	0	0	4540	0	0	0	6870	13800	20300	16000	27800	0	43200	12300	58200	51000	22900	14800	9320
NWSSTSEG	434.193	0.02	60	8.6	4			0	855.436	0	3.86195e-05	0	0	0	0	0	0	0	0	0	0	0	0	0	0	0	0	0	1450	1200	961	1160	0	1800	1800	49.1	973	16.7	0
A(+42.01)PAPPPLLPLLLLLALALVAPSRGGGG	647.401	0.04	60	6.4	9.79		Acetylation (Protein N-term)	0	3307.27	0	3.79372e-05	0	0	0	0	0	0	0	0	0	0	0	0	0	0	0	0	0	0	0	4910	2320	2180	7320	2730	4530	0	4590	7800
S(+42.01)DKPDMAEIEKFDKSKL	506.507	0.55	42.02	4.6	4.86	sp|P62328|TYB4_HUMAN	Acetylation (Protein N-term)	298129	5118.18	58.2491	3.75965e-05	106000	42200	615000	63300	481000	424000	68700	277000	405000	187000	255000	448000	206000	300000	218000	249000	723000	5420	0	0	0	4810	11600	0	16300	11100	7070	0
LRGPHLAKLELIRRLRSQ(+.98)	719.781	0.06	5.39	6.3	12		Deamidation (NQ)	200	3024	0.0661376	3.74076e-05	0	0	0	0	0	0	0	0	0	0	0	0	3400	0	0	0	0	1720	5390	3810	894	1050	2030	1320	2480	1730	6150	6690
S(+42.01)ETSRTAFGGRRAVPPNNSNAAEDDLPTVELQGVVPR	988.247	0.32	60	4.2	4.93		Acetylation (Protein N-term)	359500	0	#DIV/0!	3.73442e-05	528000	164000	368000	563000	235000	14100	760000	249000	540000	265000	419000	322000	238000	286000	910000	32400	218000	0	0	0	0	0	0	0	0	0	0	0
AGAPSEDPQ	436.196	0.13	60	5.7	3.67			0	13371.4	0	3.57316e-05	0	0	0	0	0	0	0	0	0	0	0	0	0	0	0	0	0	0	24600	17000	22400	19100	13100	28800	21400	0	0	685
ETTGVEAM	419.189	0.12	60	4.2	3.8			0	8841.82	0	3.50419e-05	0	0	0	0	0	0	0	0	0	0	0	0	0	0	0	0	0	0	11600	9080	13000	0	9620	25600	10700	0	9850	7810
KKLLHGL	404.78	0.17	60	4.8	10			4891.76	0	#DIV/0!	3.45903e-05	7710	5360	4610	4710	9740	12300	7110	4840	0	2330	5350	6700	0	1540	4470	2820	3570	0	0	0	0	0	0	0	0	0	0	0
GSTGNRNPGSSGTGGTATWKPGSSGP	792.372	0.03	60	2.9	11	sp|P02671|FIBA_HUMAN		367.647	10166.4	0.0361631	3.23197e-05	0	0	0	0	4570	0	0	0	0	0	0	0	0	1680	0	0	0	8900	7720	12000	9930	2460	13200	31500	11500	3530	2520	8570
Q(-17.03)GVNDNEEGFFS	663.265	0.23	60	6.6	3.57	sp|P02675|FIBB_HUMAN	Pyro-glu from Q	56651.2	0	#DIV/0!	3.12421e-05	49300	10600	26600	47900	81900	8570	117000	13600	43100	32500	51600	74500	42500	54000	65400	138000	106000	0	0	0	0	0	0	0	0	0	0	0
ASASASSAAS	405.185	0.17	60	5.4	5.57			0	21452.7	0	2.98817e-05	0	0	0	0	0	0	0	0	0	0	0	0	0	0	0	0	0	13300	24800	4100	28700	20500	66200	28600	24300	0	16900	8580
ADDEDDDEDGQDN(+.98)Q(+.98)GT	580.836	0.18	60	4.5	3.07	sp|Q86U86|PB1_HUMAN	Deamidation (NQ)	13438.8	0	#DIV/0!	2.97103e-05	21100	24900	13900	18800	0	0	22000	18800	14300	0	21600	12600	13500	7660	21800	0	17500	0	0	0	0	0	0	0	0	0	0	0
N(+.98)GFKSHALQLNNR	500.595	0.12	60	3.9	11		Deamidation (NQ)	48.4118	26368.2	0.00183599	2.95235e-05	0	0	0	0	0	0	0	0	0	0	823	0	0	0	0	0	0	78300	9640	18000	29900	15100	7110	48200	27800	2300	19700	34000
EETKENEGFTVTAEGK	590.279	0.11	60	6.6	4.33	sp|P01024|CO3_HUMAN		23645.3	0	#DIV/0!	2.91459e-05	59400	2870	17600	11000	48800	23000	15800	16500	15800	19600	13200	39500	31100	14100	14500	15300	43900	0	0	0	0	0	0	0	0	0	0	0
PNTAR	558.287	0.34	60	3.5	10.18			1001.18	3898.18	0.256832	2.88701e-05	1650	0	0	0	2050	0	1240	0	1200	1110	1780	1820	0	0	1080	2350	2740	1720	5230	3080	4460	5600	3170	8480	4760	1850	2210	2320
SGPPGLPGNPGPAGQKGETVVGPQGPPGAPGLPGPPGFGRPGDPGP	826.81	0.22	60	4.8	5.79			1483.35	8126.36	0.182536	2.86078e-05	0	0	0	0	12000	0	0	0	0	0	0	0	0	0	927	7720	4570	4960	7880	8830	5820	5550	8470	16000	12100	6440	8030	5310
EPLGRQLTSGP	577.811	0.22	60	3.2	6.1			0	32581.8	0	2.75392e-05	0	0	0	0	0	0	0	0	0	0	0	0	0	0	0	0	0	22600	19800	61400	63900	0	32100	55500	69600	0	0	33500
GQ(+.98)HGLGSGQ	421.191	0.05	60	8.6	6.74		Deamidation (NQ)	0	7769.09	0	2.61898e-05	0	0	0	0	0	0	0	0	0	0	0	0	0	0	0	0	0	0	7440	7370	20700	3270	14000	3230	13400	0	6590	9460
SEETKENEGFTVTAEGK	619.289	0.11	6.87	4.1	4.32	sp|P01024|CO3_HUMAN		130696	12820.9	10.194	2.48812e-05	364000	5340	125000	177000	180000	131000	91600	110000	71600	93700	62000	144000	172000	122000	90600	171000	111000	9470	9900	10800	8060	11700	19100	12900	29300	11100	9400	9300
NALVMFNG	433.206	0.13	60	6	5.52	sp|Q5T3J3|LRIF1_HUMAN		44.8235	15626.4	0.00286846	2.40117e-05	0	0	0	0	0	0	0	0	0	0	0	0	0	0	762	0	0	17800	17000	27700	14300	9040	0	17800	44500	0	6850	16900
N(+.98)GFKSHALQLNNRQIR	380.209	0.12	60	4.9	12.01		Deamidation (NQ)	141.176	67109.1	0.00210369	2.30564e-05	0	0	0	0	0	0	0	0	0	0	0	0	0	0	0	2400	0	148000	55700	35600	75600	68300	25400	101000	173000	26800	0	28800
AKAVLEEDEEVTEEAEMEPEDKGH	679.303	0.18	60	2.6	3.99			27300.6	0	#DIV/0!	2.12877e-05	14600	13200	51300	4010	34300	37700	3300	23000	34100	11000	25700	42200	20600	30100	17800	30100	71100	0	0	0	0	0	0	0	0	0	0	0
VCGVEPPGPGDTVVQ(+.98)GDLQETTVVTGLGP	706.345	0.12	60	4.3	3.43		Deamidation (NQ)	64.5294	4040	0.0159726	2.11097e-05	0	621	0	0	0	0	0	0	0	0	0	0	0	0	476	0	0	3720	5070	4210	0	2890	0	9530	8050	0	5460	5510
PGGAAGPKG	356.193	0.38	12.28	3.3	9.18			2522.35	19408.2	0.129963	2.09333e-05	0	0	0	0	12400	11200	0	0	0	0	0	0	0	3930	0	5930	9420	6220	12600	36000	22300	20000	44200	28500	13900	7090	14600	8080
SSDSEVHSEA	524.214	0.07	60	7.3	4.13			0	1210	0	2.04193e-05	0	0	0	0	0	0	0	0	0	0	0	0	0	0	0	0	0	0	1360	1000	1360	1460	2820	2570	1820	0	920	0
ECISVHVGQAGVQM(+15.99)GNACWELYCLEHGIQPDGQ	897.632	0.4	60	6.7	4.39	sp|P68366|TBA4A_HUMAN	Oxidation (M)	10083.5	0	#DIV/0!	2.02027e-05	11600	1330	3180	18100	12800	14700	11900	6250	14000	5930	0	10700	7830	8910	3190	22900	18100	0	0	0	0	0	0	0	0	0	0	0
GFKSHALQLNNRQI	542.634	0.1	60	1.8	11			199.412	3664.36	0.0544192	1.90369e-05	0	0	0	0	0	0	0	0	0	0	0	0	0	0	0	3390	0	3810	2400	2100	4700	3030	928	5220	8670	0	6920	2530
LALNVVTVAT	500.814	0.12	60	7.4	5.52			2148.53	0	#DIV/0!	1.89759e-05	1800	2770	0	3050	5560	3230	1430	2060	3440	1680	2070	2050	0	2620	2040	315	2410	0	0	0	0	0	0	0	0	0	0	0
GVRVGALLLLGVL	640.428	0.22	60	7.2	9.75			3064.82	0	#DIV/0!	1.88816e-05	2860	5100	0	0	0	3820	4080	702	4410	2880	4190	3360	2420	3280	3430	4850	6720	0	0	0	0	0	0	0	0	0	0	0
THCGPCASL	444.691	0.14	60	3.1	6.4			0	2938.18	0	1.85678e-05	0	0	0	0	0	0	0	0	0	0	0	0	0	0	0	0	0	4150	5230	4940	4550	0	5980	0	0	1220	4430	1820
LVPAAAALA	796.493	0.21	60	5.1	5.52			4196.41	35800	0.117218	1.68159e-05	0	0	0	839	27600	42900	0	0	0	0	0	0	0	0	0	0	0	54800	26200	42600	33200	0	48600	36400	72200	25800	41600	12400
SIDPTSGIITTAASL	723.884	0.04	5.48	5.9	3.8			4676.47	36600	0.127772	1.64928e-05	0	0	0	0	53300	26200	0	0	0	0	0	0	0	0	0	0	0	30800	35100	49500	25300	39800	44900	37500	0	72900	41400	25400
PAAPRCDA	400.684	0.12	60	4.7	6.22			0	7818.18	0	1.55037e-05	0	0	0	0	0	0	0	0	0	0	0	0	0	0	0	0	0	3540	5190	5510	0	13800	6210	19300	13300	0	6450	12700
DSGGQEAN(+.98)N(+.98)PN(+.98)CCNCI	547.853	0.17	60	6.8	3.67		Deamidation (NQ)	7084.71	0	#DIV/0!	1.30176e-05	9840	6060	7660	5240	0	0	8250	13800	5420	4000	9580	7140	13600	8930	8620	12300	0	0	0	0	0	0	0	0	0	0	0	0
VAAALALD	743.433	0.02	60	3	3.8	sp|Q96HH4|TM169_HUMAN		87.7647	42956.4	0.00204311	1.21629e-05	0	0	0	0	746	0	0	0	0	0	746	0	0	0	0	0	0	43000	76500	40100	35500	58200	72700	5720	107000	0	17700	16100
ELKGRARGKPSLLAAARPMRAILPAPVNVGR	817.251	0.22	60	5.7	12.18	sp|Q12766|HMGX3_HUMAN		117335	0	#DIV/0!	1.10373e-05	106000	118000	104000	118000	0	36300	54300	178000	97100	44300	139000	85100	158000	286000	195000	204000	71600	0	0	0	0	0	0	0	0	0	0	0
Q(-17.03)SLQEETVRKGPAGDRGP	636.656	0.17	60	4	6.18		Pyro-glu from Q	312.353	3569.09	0.0875161	9.80758e-06	0	0	0	0	5310	0	0	0	0	0	0	0	0	0	0	0	0	2140	3320	3950	3840	2180	3680	7900	5930	1940	2180	2200
KKAQQ	602.348	0.27	9.73	5.4	10			16942.9	38.2727	442.69	9.55393e-06	0	15800	6650	16500	9040	4140	22900	25500	34900	12700	23500	22300	19500	29100	0	23900	21600	0	0	0	421	0	0	0	0	0	0	0
AELSTSPAVQSTLPP	499.917	0.1	60	3.6	4			0	1540.91	0	9.02133e-06	0	0	0	0	0	0	0	0	0	0	0	0	0	0	0	0	0	0	1310	1600	1310	1640	1620	3940	3190	0	1130	1210
LHGSL	526.303	0.04	60	5.3	6.74			0	1143.64	0	8.1892e-06	0	0	0	0	0	0	0	0	0	0	0	0	0	0	0	0	0	1660	1080	1330	1330	1440	0	2010	2660	0	1070	0
SLGVIGALVK	478.804	0.16	60	10.1	8.47			1807.06	0	#DIV/0!	7.26692e-06	1480	1940	3300	1570	1620	4150	900	2080	1790	0	1740	1300	1760	0	1320	2840	2930	0	0	0	0	0	0	0	0	0	0	0
SLASQ(+.98)GTLQVQLSRAN(+.98)EDPEHPHANH	710.344	0.11	60	5.1	5.72		Deamidation (NQ)	100	7343.64	0.0136172	7.24285e-06	0	1110	0	0	0	0	0	0	0	0	590	0	0	0	0	0	0	6090	6090	7930	0	4670	8690	18800	13600	0	7600	7310
KKKSGK	675.448	0.62	60	3.5	10.48			53058.8	0	#DIV/0!	6.61911e-06	0	16900	87700	29900	91000	125000	40100	56200	47000	32100	47500	58600	43700	47400	23500	84300	71100	0	0	0	0	0	0	0	0	0	0	0
KQELDKERENPFLTHDIGISESIA	554.686	0.19	60	2.4	4.64			151.471	3502.73	0.0432436	5.98913e-06	0	0	0	0	0	0	0	0	0	0	0	0	695	0	1880	0	0	0	2470	4390	4400	1990	3300	7060	7360	0	3560	4000
KKAAL	530.386	0.53	60	4.6	10			24653.5	0	#DIV/0!	4.68047e-06	15100	2790	39000	8090	36600	56500	16700	27500	24800	13900	17600	23000	32800	23300	6330	39500	35600	0	0	0	0	0	0	0	0	0	0	0
PPPVLAK	361.243	0.21	60	4	9.18			31.4118	7020.91	0.00447403	4.47684e-06	0	0	0	0	0	0	0	0	0	534	0	0	0	0	0	0	0	12500	15000	2400	7560	11400	6190	2880	11600	6290	1410	0
KIFPK	632.417	0.36	60	4.1	10			10898.2	0	#DIV/0!	4.43578e-06	8920	0	13600	10800	14700	21100	6880	13600	12300	3130	16400	17600	9460	0	9650	19600	7530	0	0	0	0	0	0	0	0	0	0	0
AVLEEDEEVTEEAEMEPEDKGH	839.025	0.12	60	5.7	3.8			15304.1	0	#DIV/0!	4.22198e-06	13200	6860	21500	2600	18300	13300	2770	6880	31200	15400	17300	32900	9160	16200	13200	14800	24600	0	0	0	0	0	0	0	0	0	0	0
NGFKSHALQLNNRQIR	474.763	0.3	10.46	1.8	12.01			3016.47	214527	0.014061	3.66547e-06	17100	3960	0	7150	0	0	0	0	0	3410	2930	0	1810	0	4720	10200	0	450000	155000	137000	495000	122000	147000	334000	87800	35000	258000	139000
GGPWG	473.216	0.31	8.83	3.6	5.52			790	6976.36	0.11324	3.32467e-06	0	0	0	0	4840	3160	0	0	0	0	0	0	0	0	0	2290	3140	2580	5480	12300	7930	7890	13700	10300	6890	2670	4810	2190
KGGCGSCGCSQCSCCKPCCCSSGCGSS	621.193	0.73	42.02	3.2	8.12	sp|Q6L8H1|KRA54_HUMAN		252153	11904.5	21.1812	3.32244e-06	299000	122000	439000	74200	180000	311000	59500	405000	323000	229000	199000	545000	99900	280000	175000	237000	309000	0	0	0	0	15700	0	21100	89300	0	3570	1280
PVPAL	496.32	0.04	60	3.7	5.96	sp|O95714|HERC2_HUMAN		0	1875.45	0	3.24076e-06	0	0	0	0	0	0	0	0	0	0	0	0	0	0	0	0	0	0	2150	3090	1830	3290	2250	2670	3520	1830	0	0
FALAI	534.325	0.02	60	4.3	5.52			11.6471	336.909	0.0345703	3.19881e-06	0	0	0	198	0	0	0	0	0	0	0	0	0	0	0	0	0	227	349	654	336	263	616	352	646	0	157	106
TVVQPSVGAAAGP	577.315	0.05	60	5.3	5.19			0	4040	0	2.79156e-06	0	0	0	0	0	0	0	0	0	0	0	0	0	0	0	0	0	1440	6680	7000	7300	2650	0	6680	6030	3770	0	2890
KKKVIM(+15.99)KKRKKLTLTRPTPLVT	875.235	0.24	60	4.6	12.05		Oxidation (M)	22266.5	0	#DIV/0!	2.27387e-06	38700	21700	19300	10000	16700	25900	13200	46600	37200	21300	16000	23100	9130	37300	15800	0	26600	0	0	0	0	0	0	0	0	0	0	0
AAAGSGG	490.222	0.03	60	4.4	5.57			0	1618	0	2.08181e-06	0	0	0	0	0	0	0	0	0	0	0	0	0	0	0	0	0	710	729	3560	1070	1500	2130	3310	2540	245	864	1140
LENGANQ(+.98)NVATEDGFTPLAVALQ(+.98)Q(+.98)GHE	707.324	0.11	60	4.6	4		Deamidation (NQ)	99.4118	6594.55	0.0150748	2.06573e-06	0	1690	0	0	0	0	0	0	0	0	0	0	0	0	0	0	0	8600	13100	6210	11300	6550	6030	11900	0	0	5600	3250
GPPGSAGPPGSPGP	566.276	0.02	60	5.4	5.52	sp|P05997|CO5A2_HUMAN		0	2310	0	2.00747e-06	0	0	0	0	0	0	0	0	0	0	0	0	0	0	0	0	0	1870	2490	3200	0	1420	2790	4720	4820	0	1810	2290
DFFNGAQ(+.98)I	456.714	0.12	60	11.1	3.8		Deamidation (NQ)	0	11257.3	0	1.97504e-06	0	0	0	0	0	0	0	0	0	0	0	0	0	0	0	0	0	14000	13000	14000	13200	17100	21800	5190	0	20900	4640	0
KTLAVR	687.444	0.21	7.95	7.5	11	sp|Q86WI1|PKHL1_HUMAN		1302.24	100.091	13.0105	1.9325e-06	980	2530	1460	779	1310	1580	666	1400	1490	772	1070	800	3100	996	875	1250	1080	408	159	85.2	277	55.1	23.3	0	0	45.1	12.7	35.6
T(+42.01)GEVGSEVHLEINDPNVISQEEADSPSDSGQ(+.98)	1094.81	0.04	60	5.1	3.62		Acetylation (Protein N-term); Deamidation (NQ)	108.235	1647.45	0.0656985	1.84117e-06	0	0	1840	0	0	0	0	0	0	0	0	0	0	0	0	0	0	2470	2200	2430	1200	512	1480	2720	0	1560	2410	1140
PLLVVLLALQ(+.98)LLVVAGLVR	667.444	0.08	60	11.1	10.18		Deamidation (NQ)	0	1561.3	0	1.78553e-06	0	0	0	0	0	0	0	0	0	0	0	0	0	0	0	0	0	1980	2820	2070	1480	2270	1610	2700	0	74.3	2170	0
IRAKYGGI	439.279	0.21	60	4	9.99			1276.47	19754.5	0.0646166	1.5468e-06	0	0	0	0	21700	0	0	0	0	0	0	0	0	0	0	0	0	30000	0	32400	27600	20700	7500	26300	28600	19300	15000	9900
VGGSY	482.225	0.3	60	3	5.49			60.1765	1073.73	0.0560445	1.51754e-06	0	0	189	0	142	0	0	0	0	146	140	0	0	128	0	0	278	1300	1670	1250	900	1380	1070	1250	2350	0	420	221
KKESKKKTLKN	666.42	0.07	60	7.1	10.3			928.412	18.0909	51.3192	1.30313e-06	1270	1520	975	706	804	627	0	1160	1240	380	1290	1040	731	0	1050	1420	1570	0	0	0	0	0	0	0	0	0	199	0
ETLQVMEAAPGTGLP	757.366	0.03	60	6.7	3.8			224.118	6875.45	0.0325968	1.09364e-06	0	0	0	0	0	0	0	0	0	0	0	3810	0	0	0	0	0	2150	2420	9370	11200	5210	9490	15900	4900	2960	6060	5970
KIGKKPVAK	484.833	0.18	60	11.4	10.48			6718.24	0	#DIV/0!	1.03074e-06	9780	10500	0	4930	9860	8450	3730	8560	3930	7970	11700	7390	0	3540	6470	8580	8820	0	0	0	0	0	0	0	0	0	0	0
AQSGTSPSVCM(+15.99)N(+.98)VSGN	519.207	0.15	60	2.9	5.56		Oxidation (M); Deamidation (NQ)	0	2424.27	0	9.22877e-07	0	0	0	0	0	0	0	0	0	0	0	0	0	0	0	0	0	1510	1990	5090	3140	2240	977	4030	4520	0	1490	1680
THRIHWESASLL	483.924	0.65	60	2.2	6.61	sp|P01024|CO3_HUMAN		55318.2	0	#DIV/0!	8.65648e-07	56600	38900	78400	17300	91800	116000	57900	36700	5010	49600	32300	64600	72600	25400	56500	86100	54700	0	0	0	0	0	0	0	0	0	0	0
S(+42.01)ETAPAAPAAPAPAEKTPVK	649.344	0.03	60	4.8	5.86		Acetylation (Protein N-term)	44.8235	1224.55	0.0366042	7.97287e-07	0	0	0	0	0	0	0	0	0	0	0	0	0	762	0	0	0	1140	1240	1900	990	1970	0	2220	0	1610	1380	1020
AFIALK	662.427	0.58	60	3.8	8.8			24701.2	0	#DIV/0!	7.2434e-07	5520	10200	43000	13600	41000	52700	16400	24500	24800	16700	23200	24600	21900	24500	12100	35000	30200	0	0	0	0	0	0	0	0	0	0	0
RLGHLKK	851.551	0.38	60	4.6	11.17			4246.47	0	#DIV/0!	6.99759e-07	2530	3950	5390	3620	5580	8840	5210	4930	2630	0	4800	4730	3910	4140	0	5850	6080	0	0	0	0	0	0	0	0	0	0	0
DPNPCLNGGSCQDGVGS	540.555	0.09	60	3.9	3.56			0	2448.18	0	6.88724e-07	0	0	0	0	0	0	0	0	0	0	0	0	0	0	0	0	0	0	4300	4140	3500	2810	2220	0	4410	1540	1940	2070
E(-18.01)PRAGFAVV	464.268	0.14	60	4.4	6.1		Pyro-glu from E	102.941	4370.91	0.0235514	6.16545e-07	0	0	0	0	0	1750	0	0	0	0	0	0	0	0	0	0	0	2110	3200	6680	3720	4850	8680	8270	2850	0	5050	2670
Q(-17.03)FTSSTSYNRGDSTFESKSYKMA	869.052	0.13	7.05	6.6	8.43	sp|P02671|FIBA_HUMAN	Pyro-glu from Q	16500	165.455	99.7253	5.94776e-07	25200	7890	6980	24300	26000	0	13400	7590	17600	24100	17800	25800	20100	20500	17200	5240	20800	0	0	0	0	1820	0	0	0	0	0	0
QVLKIIATFK	580.88	0.26	60	8.7	10			7456.47	0	#DIV/0!	4.52295e-07	8910	14900	6430	2480	9710	9570	8240	11300	11500	0	3910	4050	9070	5190	7020	5680	8800	0	0	0	0	0	0	0	0	0	0	0
HIDSNGNSSPGCSPQPHIHSIHVKEEPVIA	797.378	0.02	60	2.9	6			0	1764.55	0	3.84645e-07	0	0	0	0	0	0	0	0	0	0	0	0	0	0	0	0	0	0	3480	1670	0	1620	2400	3010	1840	2360	1130	1900
MISACKGE	419.684	0.15	60	6.4	5.75	sp|P21817|RYR1_HUMAN		0	16545.5	0	3.69342e-07	0	0	0	0	0	0	0	0	0	0	0	0	0	0	0	0	0	0	30600	21600	28000	13400	21600	15800	25300	0	11700	14000
GPGVSGGSPAGGAGGGSSGLPPS	589.611	0.02	60	4.3	5.52			0	4680.91	0	3.22436e-07	0	0	0	0	0	0	0	0	0	0	0	0	0	0	0	0	0	3710	4030	7850	6090	0	5410	7060	8930	0	3790	4620
EQNCCEECCCQPGCC	551.153	0.4	60	3.8	3.67	sp|Q9BYP8|KR171_HUMAN		73405.9	0	#DIV/0!	3.15707e-07	152000	97600	53100	91900	0	61000	82700	118000	98700	45700	106000	58900	78800	49300	65500	45800	42900	0	0	0	0	0	0	0	0	0	0	0
GLPGQ(+.98)EGLPGKDGDT	721.335	0.11	60	6.1	4.03		Deamidation (NQ)	39.5882	14024.5	0.00282278	3.12956e-07	0	0	0	0	0	0	0	0	0	0	673	0	0	0	0	0	0	11800	16200	35500	10400	7220	15100	12000	20400	3850	6900	14900
VTKKKKIGK	515.358	0.31	60	5.5	10.6			4559.41	0	#DIV/0!	2.7428e-07	6170	7040	4810	2090	0	6300	3040	6930	3930	3340	6180	6420	3370	3650	1250	7290	5700	0	0	0	0	0	0	0	0	0	0	0
LFKRR	719.474	0.56	60	3.8	12.01			34867.6	0	#DIV/0!	2.65664e-07	4750	17800	49400	20300	56400	73900	27200	38500	32000	23800	32600	39700	28000	32100	20400	50700	45200	0	0	0	0	0	0	0	0	0	0	0
RVIVV	585.415	0.45	60	3.9	9.75			7983.53	0	#DIV/0!	2.27086e-07	7620	15200	5510	3860	4710	7730	7630	17700	10900	5250	10800	4950	6510	5660	5370	7310	9010	0	0	0	0	0	0	0	0	0	0	0
KVEQAVETEPEPELR	585.302	0.08	6.06	5.3	4.33			105.882	3412.73	0.0310257	1.56197e-07	0	0	0	0	0	1800	0	0	0	0	0	0	0	0	0	0	0	3920	2520	3470	2520	2840	7940	2800	5540	1460	1690	2840
PGELTAESPQ(+.98)STDDAHQ(+.98)GSQ(+.98)GAEALSPLSPCSP	654.295	0.24	10.05	5.3	3.83		Deamidation (NQ)	921.294	8841.82	0.104197	1.02844e-07	1040	0	1440	595	1230	0	1500	0	0	361	826	3500	1100	0	1560	0	2510	5710	6970	10100	9030	4800	8420	18300	10500	2320	7510	13600
HPAAA	466.232	0.03	60	3.7	6.74			0	2211.64	0	8.7454e-08	0	0	0	0	0	0	0	0	0	0	0	0	0	0	0	0	0	1720	2120	3130	1980	2530	3740	2880	4300	565	779	584
FLAIVYF	436.756	0.13	60	4.3	5.52			0	4635.45	0	8.70246e-08	0	0	0	0	0	0	0	0	0	0	0	0	0	0	0	0	0	2540	6280	6380	7280	5040	7400	0	7940	1940	3230	2960
HGVGGV	525.266	0.13	60	2.3	6.74			0	3439.85	0	8.65211e-08	0	0	0	0	0	0	0	0	0	0	0	0	0	0	0	0	0	4150	2840	3010	5220	2540	4570	7220	4360	1270	2580	78.3
KGKKK	588.426	0.42	14.76	4.3	10.48			12223.5	731.273	16.7154	7.57236e-08	14000	13000	15200	6260	14100	19500	6280	12200	6920	12000	23800	14100	4470	5670	12400	14300	13600	552	1250	0	743	2080	0	1290	1340	789	0	0
KKKTK	632.452	0.49	35.88	4.3	10.48			11442.9	50.3636	227.206	6.41198e-08	13600	14700	14100	4370	13200	18200	5060	9290	6560	11300	22400	13900	4590	5360	12300	12900	12700	0	0	0	0	0	0	0	0	554	0	0
AVVAAAAGL	742.448	0.12	60	2.9	5.57			0	25672.7	0	6.24495e-08	0	0	0	0	0	0	0	0	0	0	0	0	0	0	0	0	0	25900	17900	20300	22200	55100	25800	36500	32200	0	12000	34500
KKKRGT	717.492	0.48	60	4.3	11.26	sp|A3KMH1|VWA8_HUMAN		20672.9	0	#DIV/0!	5.97621e-08	17900	26400	22800	11200	25500	22300	2300	37800	3940	17100	30700	21700	22500	21000	13800	27700	26800	0	0	0	0	0	0	0	0	0	0	0
KLVKYLLVK	552.377	0.33	60	6.2	10			8327.65	0	#DIV/0!	5.66667e-08	8950	8110	7740	0	9500	12000	7310	8990	12900	6880	10500	2490	6660	6570	6070	12500	14400	0	0	0	0	0	0	0	0	0	0	0
E(-18.01)QGSAGIPGP	447.714	0.2	60	2.9	4	sp|P05997|CO5A2_HUMAN	Pyro-glu from E	0	56534.5	0	4.3558e-08	0	0	0	0	0	0	0	0	0	0	0	0	0	0	0	0	0	3380	84400	45500	70200	37900	76700	80300	97600	78200	19500	28200
ERGDNDISPFSGDQPFKN	1011.96	0.06	5.58	3.9	4.23			6310	26581.8	0.23738	3.83602e-08	0	0	19600	0	18600	16600	0	1140	0	0	0	0	3630	11600	0	19600	16500	27400	28200	27000	25300	29800	26400	29800	20200	26100	23800	28400
KKVPQ	599.394	0.29	60	4.1	10			1469.12	0	#DIV/0!	1.27757e-08	1550	0	1550	1060	1850	2400	1120	2400	1900	930	2070	1770	1160	1380	1430	1470	935	0	0	0	0	0	0	0	0	0	0	0
PGSSGTGGTATWKPGSSGP	844.898	0.02	60	5.5	9.18	sp|P02671|FIBA_HUMAN		0	1636.36	0	1.20554e-08	0	0	0	0	0	0	0	0	0	0	0	0	0	0	0	0	0	1570	1490	2150	1020	1270	1960	3310	2310	0	1650	1270
VKGLK	544.4	0.42	17.05	4.2	10	sp|P22105|TENX_HUMAN		10603.5	507	20.9143	1.1412e-08	12700	9570	13400	4250	12200	16500	6140	10800	7440	9660	19400	12100	5130	5670	10800	13000	11500	899	1020	0	408	513	252	555	1040	890	0	0
Q(+.98)AAGASPH	370.174	0.15	60	4.4	6.74		Deamidation (NQ)	0	9088.18	0	1.09205e-08	0	0	0	0	0	0	0	0	0	0	0	0	0	0	0	0	0	6650	12000	9210	11100	5700	13700	9950	17300	0	8530	5830
ADSGEGDFLAEGGGV	690.798	0.25	60	2.9	3.43	sp|P02671|FIBA_HUMAN		86611.8	0	#DIV/0!	1.07248e-08	128000	34100	70300	59300	121000	134000	65600	116000	129000	68700	42400	66800	79300	91800	94700	133000	38400	0	0	0	0	0	0	0	0	0	0	0
VKLFVT	706.453	0.57	60	4.2	8.72			21371.8	0	#DIV/0!	7.94402e-09	8620	12800	34000	12400	34600	37300	14000	21000	19900	15800	21300	22400	19900	21000	13200	27600	27500	0	0	0	0	0	0	0	0	0	0	0
KKSAKK	689.463	0.55	60	3.8	10.48			65841.2	0	#DIV/0!	5.82152e-09	39000	53500	90300	40800	84300	136000	45100	63400	61000	41100	71500	75200	63100	43700	40500	87500	83300	0	0	0	0	0	0	0	0	0	0	0
NGFKSHALQLNN	448.234	0.12	60	4.3	8.76			42.5294	7956.36	0.00534533	3.77608e-09	0	0	0	723	0	0	0	0	0	0	0	0	0	0	0	0	0	13200	4920	4570	10800	5920	2820	14200	8870	4080	9130	9010
GAGLPGGRR	420.753	0.21	60	5	12			109.412	57554.5	0.00190101	8.7029e-10	0	0	0	0	0	0	0	0	0	0	0	0	0	0	0	1860	0	54000	80900	66900	76700	57300	24700	0	86400	71400	65900	48900
K(+42.01)GIPVRV	810.508	0.28	9.47	6.9	11	sp|O95239|KIF4A_HUMAN	Acetylation (Protein N-term)	14607.6	109409	0.133514	8.421e-10	0	248	24300	0	39300	82600	0	482	0	0	0	0	0	24300	0	35600	41500	155000	71100	84300	97700	108000	123000	86600	157000	113000	132000	75800
KLESPR	729.417	0.04	60	6.2	8.75			31.4706	39263.6	0.00080152	6.51852e-11	0	0	0	0	0	0	0	0	535	0	0	0	0	0	0	0	0	10600	49100	24600	51600	49700	55200	42500	53800	37500	40700	16600
ILKAPGT	699.442	0.19	60	2.9	8.75			0	75827.3	0	6.43631e-11	0	0	0	0	0	0	0	0	0	0	0	0	0	0	0	0	0	93000	76700	73200	91200	94300	63500	53200	111000	84700	93300	0
IGTKIG	588.373	0.05	60	1.9	8.75			0	15654.5	0	5.58241e-11	0	0	0	0	0	0	0	0	0	0	0	0	0	0	0	0	0	23600	15600	14400	20800	16900	15500	15200	21100	0	16100	13000
NDISPFSGDQPFKN	783.363	0.29	11.84	6.4	4.21			9131.18	43563.6	0.209605	3.84188e-11	0	0	18000	0	24300	22600	0	2660	8170	2750	2610	6840	9200	21000	0	17300	19800	49100	39000	40200	44500	39700	40700	41100	42600	37600	45000	59700
LLAPVAPK	808.52	0.38	13.14	4.5	8.75			8914.71	370.727	24.0465	2.95356e-11	8790	9490	7920	9130	4880	11700	7290	10500	11300	4280	9450	8470	13400	8320	4940	11900	9790	306	412	660	391	1070	583	0	0	447	209	0
Q(-17.03)STNAYPDLR	574.272	0.05	60	4.4	5.84		Pyro-glu from Q	681.118	19614.5	0.0347251	1.1217e-11	0	0	0	0	10800	0	0	0	0	779	0	0	0	0	0	0	0	24600	20200	21000	22600	23800	20700	11700	28100	22000	11800	9260
QLGELLA	743.433	0.08	6.14	6.5	4	sp|Q96HA7|TONSL_HUMAN		2600.59	94145.5	0.0276231	1.37301e-13	0	0	0	1490	28800	0	0	2440	3250	0	1710	0	0	6520	0	0	0	95000	89700	89200	95500	68900	89200	129000	147000	85100	96300	50700
LLGKK	558.415	0.3	11.07	4.9	10	sp|P22105|TENX_HUMAN		6764.71	113.182	59.7685	1.06925e-13	6840	7200	5030	5330	8800	7910	5940	8750	7610	3510	7390	5950	5300	6500	5780	8170	8990	356	0	0	0	0	0	0	0	889	0	0
